# Supplementary material for: Highly enantioselective aza-Henry reaction with isatinN-Boc ketimines
Source: Royal Society of Chemistry journal article supplement (doi:10.1039/c4cc04051a), 2014-01-01
Supplement: c4cc04051a3.pdf [file c4cc04051a3.pdf]

# Highly enantioselective aza-Henry reaction with isatin *N*-Boc ketimines

Melireth Holmquist,<sup>a</sup> Gonzalo Blay,<sup>\*a</sup> José R. Pedro<sup>\*a</sup>

<sup>a</sup> *Departament de Química Orgànica, Facultat de Química-Universitat de València, C/ Dr. Moliner 50, E-46100-Burjassot (València), Spain.*

## SUPPORTING INFORMATION

### Table of Contents:

|                                                                                                          |          |
|----------------------------------------------------------------------------------------------------------|----------|
| General Experimental Methods                                                                             | S2       |
| Synthesis of <i>N</i> - <i>tert</i> -butoxycarbonyl ketimines <b>1</b>                                   | S2-S4    |
| General procedure for the enantioselective aza-Henry reaction and characterization of compounds <b>3</b> | S4-S14   |
| Transformation of the nitroamines <b>3</b>                                                               | S14-S17  |
| Literature                                                                                               | S17      |
| <sup>1</sup> H NMR and <sup>13</sup> C NMR spectra                                                       | S18-S76  |
| Chiral analysis chromatograms                                                                            | S77-S106 |

## General Experimental Methods

Commercial reagents were used as purchased. Commercial anhydrous 1,4-dioxane (Aldrich Cat. 29630-9) was used for isatin *N*-Boc ketimines synthesis. THF was freshly distilled from Na-benzophenone. Diisopropyl amine was dried and stored over CaH<sub>2</sub>. All reactions were carried out in glassware oven-dried overnight at 120 °C. Reactions were monitored by TLC analysis using Merck Silica Gel 60 F-254 thin layer plates. Flash column chromatography was performed on Merck silica gel 60, 0.040-0.063 mm. NMR spectra were recorded in the deuterated solvents as stated, using residual non-deuterated solvent as internal standard. Specific optical rotations were measured using sodium light (D line 589 nm). Mass spectra (ESI) were recorded on a mass spectrometer equipped with an electrospray source with a capillary voltage of 3.3 kV. Chiral HPLC analyses were performed in a chromatograph equipped with a UV diode-array detector using chiral stationary phase columns from Daicel. 1-Methyl isatin, 1-benzyl isatin, 1-methoxymethyl isatin and 1-benzyloxycarbonyl isatin were prepared from isatin according to reported procedures.<sup>1</sup>

### Synthesis of *N*-*tert*-butoxycarbonyl ketimines **1**.

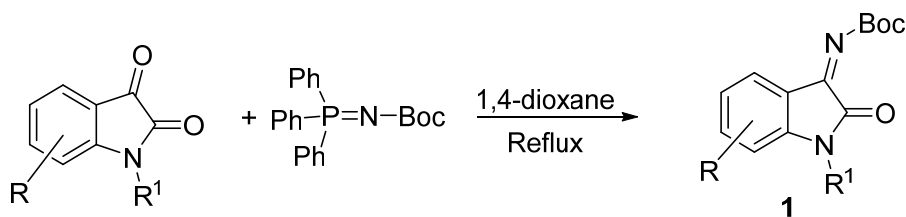

The isatin (1.0-3.0 mmol) and *tert*-butoxycarbonylaminotriphenylphosphine<sup>2</sup> (1.3 mmol/mmol isatin) were placed in a round-bottom flask equipped with a condenser under nitrogen atmosphere. Anhydrous 1,4-dioxane (1 mL/mmol isatin) was injected and the mixture was heated at reflux temperature until the reaction was complete (10-24 h). The solvents were evaporated under reduced pressure and the crude was purified by flash chromatography affording ketimines **1**. Ketimines **1** were recrystallized from hexane-EtOAc or hexane-CH<sub>2</sub>Cl<sub>2</sub> when necessary. NMR data for compounds **1a-j**, **1m** coincided with those reported in the literature.<sup>3</sup>

***tert*-Butyl (6-chloro-2-oxoindolin-3-ylidene)carbamate (1k)**

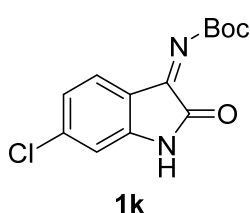

Obtained in 63% yield as a yellow solid, mp °C; <sup>1</sup>H NMR (CDCl<sub>3</sub>, 300 MHz) δ 8.64 (br s, 1H), 7.54 (d, *J* = 8.4 Hz, 1H), 7.04 (dd, *J* = 8.1, 1.8 Hz, 1H), 6.91 (s, 1H), 1.60 (s, 9H); <sup>13</sup>C NMR (CDCl<sub>3</sub>, 75 MHz) δ 160.5 (C), 146.9 (CH), 141.6 (C), 136.9 (C), 125.5 (C), 123.7 (CH), 112.3 (CH), 111.7 (C), 84.0 (C), 28.0 (CH<sub>3</sub>); MS(ESI) *m/z*: 303.0510 (M+Na)<sup>+</sup>, C<sub>13</sub>H<sub>13</sub>ClN<sub>2</sub>NaO<sub>3</sub> required 303.0507.

***tert*-Butyl (7-chloro-2-oxoindolin-3-ylidene)carbamate (1l)**

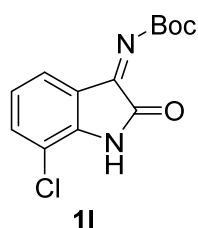

Obtained in 96% yield as a yellow solid, mp °C; <sup>1</sup>H NMR (CDCl<sub>3</sub>, 300 MHz) δ 8.04 (br s, 1H), 7.56 (d, *J* = 7.8 Hz, 1H), 7.44 (dd, *J* = 8.1, 0.9 Hz, 1H), 7.06 (t, *J* = 7.8 Hz, 1H), 1.61 (s, 9H); <sup>13</sup>C NMR (DMSO, 75 MHz) δ 159.5 (C), 158.1 (C), 153.7 (C), 144.7 (CH), 135.4 (CH), 123.9 (CH), 122.5 (C), 121.0 (C), 115.7 (C), 82.6 (C), 27.6 (CH<sub>3</sub>); MS(ESI) *m/z*: 303.0507 (M+Na)<sup>+</sup>, C<sub>13</sub>H<sub>13</sub>ClN<sub>2</sub>NaO<sub>3</sub> required 303.0507.

***tert*-butyl (*Z*)-(5,7-dimethyl-2-oxoindolin-3-ylidene)carbamate (1n)**

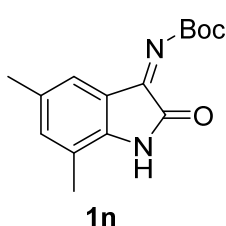

Obtained in 65% yield as a yellow solid, mp °C; <sup>1</sup>H NMR (CDCl<sub>3</sub>, 300 MHz) δ 9.25 (br s, 1H), 7.27 (s, 1H), 7.06 (s, 1H), 2.27 (s, 3H), 2.21 (s, 3H), 1.61 (s, 9H); <sup>13</sup>C NMR (CDCl<sub>3</sub>, 75 MHz) δ 142.2 (CH), 137.6 (C), 137.5 (C), 133.0 (CH), 122.5 (C), 97.7 (C), 83.2 (C), 28.0 (CH<sub>3</sub>), 20.8 (CH<sub>3</sub>), 15.7 (CH<sub>3</sub>); MS(ESI) *m/z*: 297.1212 (M+Na)<sup>+</sup>, C<sub>15</sub>H<sub>18</sub>N<sub>2</sub>NaO<sub>3</sub> required 297.1210.

## General procedure for the enantioselective aza-Henry reaction

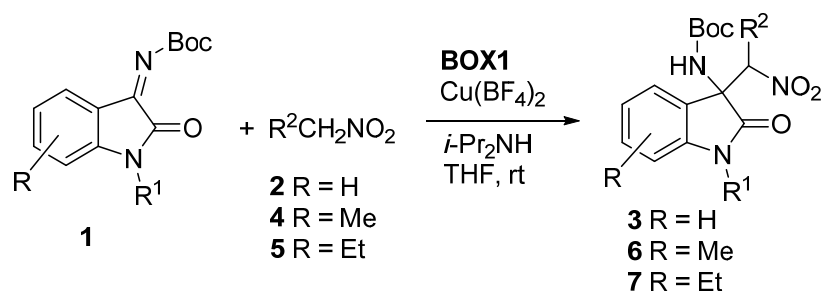

Copper (II) tetrafluoroborate hydrate (5.9 mg, 0.025 mmol) contained in a Schlenk tube was dried under vacuum and the tube was filled with nitrogen. A solution of ligand **BOX1** (8.4 mg, 0.025 mmol) and nitroalkane (9.2 eq) in THF (0.25 mL) was added via syringe. After stirring for 1 h, a solution of ketimine **1** (0.25 mmol) and diisopropylamine (4.5  $\mu$ L, 0.032 mmol) in THF (0.38 mL) was added. The reaction was stirred at room temperature until completion (monitored by TLC). The solvent was removed under reduced pressure, and the residue chromatographed on silica gel eluting with hexane/EtOAc mixtures to give compounds **3** (**6,7**).

### *tert*-Butyl (*S*)-(3-(nitromethyl)-2-oxoindolin-3-yl)carbamate (**3a**)

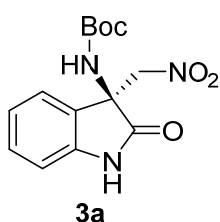

Purified by column chromatography eluting with hexane/EtOAc 60:40, (60 mg, 99% yield). The *ee* (99.6%) was determined by HPLC analysis, Chiralpak AD-H, hexane/*i*-PrOH 80:20, 1 mL/min, major enantiomer (*S*)  $t_r$  = 12.5 min, minor enantiomer (*R*)  $t_r$  = 14.5 min.

White solid; mp 179-181 °C (hexane-EtOAc);  $[\alpha]_D^{20}$  +16.3 ( $c$  0.9, CH<sub>2</sub>Cl<sub>2</sub>, 99.6% *ee*); <sup>1</sup>H NMR (300 MHz, CDCl<sub>3</sub>)  $\delta$  8.04 (s, 1H), 7.31 (m, 2H), 7.07 (td,  $J$  = 7.8, 0.9 Hz, 1H), 6.91 (dd,  $J$  = 8.4, 0.9 Hz, 1H), 6.13 (s, 1H), 4.86 (d,  $J$  = 12.3 Hz, 1H), 4.60 (d,  $J$  = 12.3 Hz, 1H), 1.35 (s, 9H); <sup>13</sup>C NMR (75 MHz, CDCl<sub>3</sub>)  $\delta$  174.3 (C), 153.8 (C), 140.4 (C), 130.4 (CH), 126.2 (C), 124.1 (CH), 123.4 (CH), 110.9 (CH), 81.6 (C), 78.0 (CH<sub>2</sub>), 60.2 (C), 28.1 (CH<sub>3</sub>); MS(ESI)  $m/z$ : 330.1059 (M+Na)<sup>+</sup>, C<sub>14</sub>H<sub>17</sub>N<sub>3</sub>NaO<sub>5</sub> required 330.1060.

***tert*-Butyl (*S*)-(1-methyl-3-(nitromethyl)-2-oxoindolin-3-yl)carbamate (**3b**)**

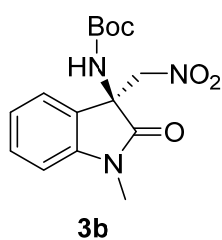

Purified by column chromatography eluting with hexane/EtOAc 70:30 (62.4 mg, 82% yield). The *ee* (99.8%) was determined by HPLC analysis, Chiralcel OD-H, hexane/*i*-PrOH 80:20, 1 mL/min, major enantiomer (*S*)  $t_r = 8.4$  min, minor enantiomer (*R*)  $t_r = 10.8$  min.

Yellow solid; mp 140-142 °C (hexane-EtOAc);  $[\alpha]_D^{20} +17.0$  (*c* 0.9, CH<sub>2</sub>Cl<sub>2</sub>, 99.8% *ee*); <sup>1</sup>H NMR (300 MHz, CDCl<sub>3</sub>) δ 7.42 (m, 1H), 7.36 (dd, *J* = 7.8, 1.2 Hz, 1H), 7.09 (td, *J* = 7.5, 0.9 Hz, 1H), 6.90 (d, *J* = 7.8 Hz, 1H), 5.98 (s, 1H), 4.92 (d, *J* = 12.3 Hz, 1H), 4.59 (d, *J* = 12.3 Hz, 1H), 3.27 (s, 3H), 1.31 (s, 9H); <sup>13</sup>C NMR (75 MHz, CDCl<sub>3</sub>) δ 172.7 (C), 153.7 (C), 143.3 (C), 130.4 (CH), 125.8 (C), 124.3 (CH), 123.4 (CH), 108.9 (CH), 81.2 (C), 77.8 (CH<sub>2</sub>), 59.8 (C), 28.0 (CH<sub>3</sub>), 26.8 (CH<sub>3</sub>); MS(ESI) *m/z*: 344.1217 (M+Na)<sup>+</sup>, C<sub>15</sub>H<sub>19</sub>N<sub>3</sub>NaO<sub>5</sub> required 344.1217.

***tert*-Butyl (*S*)-(1-benzyl-3-(nitromethyl)-2-oxoindolin-3-yl)carbamate (**3c**)**

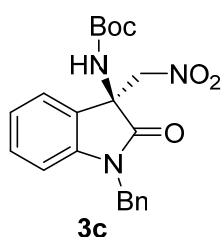

Purified by column chromatography eluting with hexane/EtOAc 80:20 (76.3 mg, 79% yield). The *ee* (99.9%) was determined by HPLC analysis, Chiralcel OD-H, hexane/*i*-PrOH 95:05, 1 mL/min, major enantiomer (*S*)  $t_r = 17.8$  min, minor enantiomer (*R*)  $t_r = 21.0$  min.

Yellow solid; mp 154-156 °C (hexane-EtOAc);  $[\alpha]_D^{20} +30.2$  (*c* 1.0, CH<sub>2</sub>Cl<sub>2</sub>, 99.9% *ee*); <sup>1</sup>H NMR (300 MHz, CDCl<sub>3</sub>) δ 7.44 (d, *J* = 7.2 Hz, 1H), 7.39-7.27 (m, 6H), 7.24 (dd, *J* = 7.8, 1.2 Hz, 1H), 7.05 (td, *J* = 7.5, 0.9 Hz, 1H), 6.77 (d, *J* = 8.1 Hz, 1H), 5.98 (s, 1H), 5.06 (d, *J* = 15.6 Hz, 1H), 4.98 (d, *J* = 12.3 Hz, 1H), 4.87 (d, *J* = 15.9 Hz, 1H), 4.66 (d, *J* = 12.3 Hz, 1H), 1.36 (s, 9H); <sup>13</sup>C NMR (75 MHz, CDCl<sub>3</sub>) δ 172.9 (C), 153.8 (C), 142.5 (C), 135.0 (C), 130.3 (CH), 128.9 (2CH), 127.9 (CH), 127.3 (2CH), 125.8 (C), 124.5 (C), 123.4 (CH), 109.9 (CH), 81.3 (C), 77.8 (CH<sub>2</sub>), 59.9 (C), 44.5 (CH<sub>2</sub>), 28.1 (CH<sub>3</sub>); MS(ESI) *m/z*: 420.1531 (M+Na)<sup>+</sup>, C<sub>21</sub>H<sub>23</sub>N<sub>3</sub>NaO<sub>5</sub> required 420.1530.

**tert-Butyl (S)-(1-(methoxymethyl)-3-(nitromethyl)-2-oxoindolin-3-yl)carbamate (3d)**

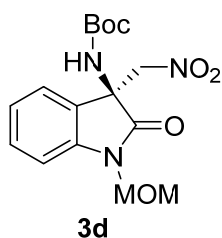

Purified by column chromatography eluting with hexane/EtOAc 70:30 (85.8 mg, 84% yield). The *ee* (99.9%) was determined by HPLC analysis, Chiralcel OD-H, hexane/*i*-PrOH 95:05, 1 mL/min, major enantiomer (*S*)  $t_r = 16.5$  min, minor enantiomer (*R*)  $t_r = 20.0$  min.

Yellow solid; mp 152-154 °C (hexane-EtOAc);  $[\alpha]_D^{20} -1.2$  ( $c$  1.0, CH<sub>2</sub>Cl<sub>2</sub>, 99.9% *ee*); <sup>1</sup>H NMR (300 MHz, CDCl<sub>3</sub>)  $\delta$  7.43-7.35 (m, 2H), 7.20-7.09 (m, 2H), 5.97 (s, 1H), 5.21 (d,  $J = 10.8$  Hz, 1H), 5.14 (d,  $J = 11.1$  Hz, 1H), 4.92 (d,  $J = 12.3$  Hz, 1H), 4.64 (d,  $J = 12.6$  Hz, 1H), 3.42 (s, 3H), 1.34 (s, 9H); <sup>13</sup>C NMR (75 MHz, CDCl<sub>3</sub>)  $\delta$  173.4 (C), 153.7 (C), 141.7 (C), 130.5 (CH), 125.4 (C), 124.3 (CH), 123.9 (CH), 110.4 (CH), 81.4 (C), 77.9 (CH<sub>2</sub>), 72.1 (CH<sub>2</sub>), 60.1 (C), 56.7 (CH<sub>3</sub>), 28.1 (CH<sub>3</sub>); MS(ESI)  $m/z$ : 374.1325 (M+Na)<sup>+</sup>, C<sub>16</sub>H<sub>21</sub>N<sub>3</sub>NaO<sub>6</sub> required 374.1323.

**tert-Butyl (S)-3-((tert-butoxycarbonyl)amino)-3-(nitromethyl)-2-oxoindoline-1-carboxylate (3e)**

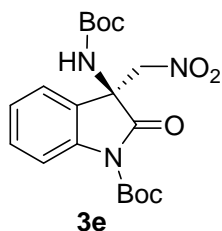

Purified by column chromatography eluting with hexane/EtOAc 60:40 (78.8 mg, 91% yield). The *ee* (99.9%) was determined by HPLC analysis, Chiralpak AD-H, hexane/*i*-PrOH 80:20, 1 mL/min, major enantiomer (*S*)  $t_r = 13.9$  min, minor enantiomer (*R*)  $t_r = 18.8$  min.

White solid; mp 139-141 °C (hexane-EtOAc);  $[\alpha]_D^{20} +3.9$  ( $c$  1.4, CH<sub>2</sub>Cl<sub>2</sub>, 99.9% *ee*); <sup>1</sup>H NMR (300 MHz, CDCl<sub>3</sub>)  $\delta$  7.89 (ddd,  $J = 8.4, 0.9, 0.6$  Hz, 1H), 7.40 (td,  $J = 9.0, 1.5$  Hz, 1H), 7.32 (dd,  $J = 7.5, 0.9$  Hz, 1H), 7.18 (td,  $J = 7.5, 0.9$  Hz, 1H), 6.17 (s, 1H), 4.86 (d,  $J = 12.6$  Hz, 1H), 4.62 (d,  $J = 12.6$  Hz, 1H), 1.64 (s, 9H), 1.27 (s, 9H); <sup>13</sup>C NMR (75 MHz, CDCl<sub>3</sub>)  $\delta$  171.1 (C), 153.4 (C), 148.5 (C), 139.5 (C), 130.6 (CH), 125.1 (C), 124.9 (CH), 123.4 (CH), 115.6 (CH), 85.2 (C), 81.8 (C), 78.1 (CH<sub>2</sub>), 60.1 (C), 28.0 (CH<sub>3</sub>), 27.9 (CH<sub>3</sub>); MS(ESI)  $m/z$ : 430.1587 (M+Na)<sup>+</sup>, C<sub>19</sub>H<sub>25</sub>N<sub>3</sub>NaO<sub>7</sub> required 430.1585.

***tert*-Butyl (*S*)-(5-methyl-3-(nitromethyl)-2-oxoindolin-3-yl)carbamate (3f)**

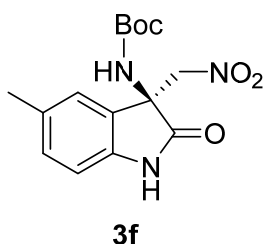

Purified by column chromatography eluting with hexane/EtOAc 70:30 (75.2 mg, 94% yield). The *ee* (96.3%) was determined by HPLC analysis, Chiralpak AD-H, hexane/*i*-PrOH 80:20, 1 mL/min, major enantiomer (*S*)  $t_r = 10.4$  min, minor enantiomer (*R*)  $t_r = 13.8$  min.

Yellow solid; mp 115-117 °C (hexane-EtOAc);  $[\alpha]_D^{20} +31$  (*c* 0.9, CH<sub>2</sub>Cl<sub>2</sub>, 96.3% *ee*); <sup>1</sup>H NMR (300 MHz, CDCl<sub>3</sub>) δ 8.25 (s, 1H), 7.11 (d, *J* = 2.0 Hz, 1H), 7.09 (dd, *J* = 8.1, 2.0 Hz, 1H), 6.78 (d, *J* = 8.1 Hz, 1H), 6.14 (s, 1H), 4.85 (d, *J* = 12.6 Hz, 1H), 4.59 (d, *J* = 12.3 Hz, 1H), 2.30 (s, 3H), 1.35 (s, 9H); <sup>13</sup>C NMR (75 MHz, CDCl<sub>3</sub>) δ 174.3 (C), 153.8 (C), 137.8 (C), 133.1 (CH), 130.8 (CH), 126.3 (C), 124.8 (CH), 110.5 (CH), 81.5 (C), 78.0 (CH<sub>2</sub>), 60.2 (C), 28.1 (CH<sub>3</sub>), 21.1 (CH<sub>3</sub>); MS(ESI) *m/z*: 344.1216 (M+Na)<sup>+</sup>, C<sub>15</sub>H<sub>19</sub>N<sub>3</sub>NaO<sub>5</sub> required 344.1217.

***tert*-Butyl (*S*)-(5-methoxy-3-(nitromethyl)-2-oxoindolin-3-yl)carbamate (3g)**

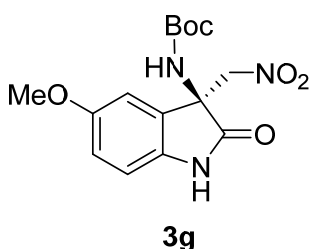

Purified by column chromatography eluting with hexane/EtOAc 70:30 (82.2 mg, 97% yield). The *ee* (97.7%) was determined by HPLC analysis, Chiralpak AD-H, hexane/*i*-PrOH 80:20, 1 mL/min, major enantiomer (*S*)  $t_r = 13.3$  min, minor enantiomer (*R*)  $t_r = 19.6$  min.

Yellow solid; mp 141-143 °C (hexane-EtOAc);  $[\alpha]_D^{20} +31.5$  (*c* 0.9, CH<sub>2</sub>Cl<sub>2</sub>, 97.7.0% *ee*); <sup>1</sup>H NMR (300 MHz, CDCl<sub>3</sub>) δ 8.33 (br s, 1H), 6.93 (s, 1H), 6.84-6.77 (m, 2H), 6.15 (s, 1H), 4.87 (d, *J* = 12.3 Hz, 1H), 4.61 (d, *J* = 12.3 Hz, 1H), 3.76 (s, 3H), 1.36 (s, 9H); <sup>13</sup>C NMR (75 MHz, CDCl<sub>3</sub>) δ 174.2 (C), 156.2 (C), 153.8 (C), 133.9 (CH), 127.5 (C), 115.2 (CH), 111.3 (CH), 111.1 (C), 81.4 (C), 77.9 (CH<sub>2</sub>), 60.5 (C), 55.8 (CH<sub>3</sub>), 28.1 (CH<sub>3</sub>); MS(ESI) *m/z*: 360.1164 (M+Na)<sup>+</sup>, C<sub>15</sub>H<sub>19</sub>N<sub>3</sub>NaO<sub>6</sub> required 360.1166.

***tert*-Butyl (*S*)-(5-bromo-3-(nitromethyl)-2-oxoindolin-3-yl)carbamate (3h)**

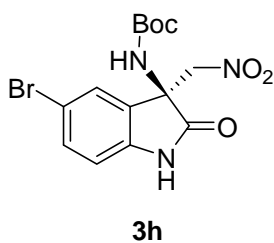

Purified by column chromatography eluting with hexane/EtOAc 70:30 (91.6 mg, 95% yield). The *ee* (81.3%) was determined by HPLC analysis, Chiralpak AD-H, hexane/*i*-PrOH 810:20, 1 mL/min, major enantiomer (*S*)  $t_r = 9.6$  min, minor enantiomer (*R*)  $t_r = 10.9$  min.

Yellow solid; mp 146-150 °C (hexane-EtOAc);  $[\alpha]_D^{20} +42.1$  (*c* 1.0, MeOH, 81.3% *ee*);  $^1\text{H}$  NMR (300 MHz,  $\text{CDCl}_3$ )  $\delta$  7.94 (br s, 1H), 7.47-7.43 (m, 2H), 6.79 (dd, *J* = 8.1, 0.6 Hz, 1H), 6.09 (s, 1H), 4.85 (d, *J* = 12.7 Hz, 1H), 4.59 (d, *J* = 12.7 Hz, 1H), 1.38 (s, 9H);  $^{13}\text{C}$  NMR (75 MHz,  $\text{CD}_3\text{OD}$ )  $\delta$  176.8 (C), 162.1 (C), 155.7 (C), 142.9 (C), 134.0 (CH), 130.9 (C), 128.1 (CH), 115.9 (C), 113.2 (CH), 82.1 (C), 78.4 ( $\text{CH}_2$ ), 61.6 (C), 28.4 ( $\text{CH}_3$ ); MS(ESI) *m/z*: 408.0163 ( $\text{M}+\text{Na}$ )<sup>+</sup>,  $\text{C}_{14}\text{H}_{16}\text{BrN}_3\text{NaO}_5$  required 408.0166.

***tert*-Butyl (*S*)-(5-chloro-3-(nitromethyl)-2-oxoindolin-3-yl)carbamate (3i)**

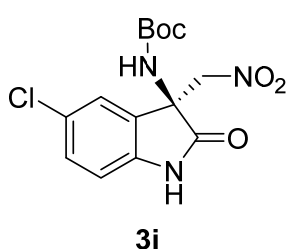

Purified by column chromatography eluting with hexane/EtOAc 70:30 (74.4 mg, 87% yield). The *ee* (97.5%) was determined by HPLC analysis, Chiralpak AD-H, hexane/*i*-PrOH 80:20, 1 mL/min, major enantiomer (*S*)  $t_r$  = 10.0 min, minor enantiomer (*R*)  $t_r$  = 11.1 min.

White solid; mp 194-196 °C (hexane-EtOAc);  $[\alpha]_D^{20} +40.8$  (*c* 1.0,  $\text{CH}_2\text{Cl}_2$ , 97.5% *ee*);  $^1\text{H}$  NMR (300 MHz,  $\text{CDCl}_3$ )  $\delta$  8.25 (s, 1H), 7.32 (d, *J* = 2.1 Hz, 1H), 7.28 (dd, *J* = 8.1, 2.1 Hz, 1H), 6.83 (d, *J* = 8.1 Hz, 1H), 6.14 (s, 1H), 4.85 (d, *J* = 12.8 Hz, 1H), 4.59 (d, *J* = 12.8 Hz, 1H), 1.38 (s, 9H);  $^{13}\text{C}$  NMR (75 MHz,  $\text{CDCl}_3$ )  $\delta$  173.7 (C), 153.8 (C), 138.9 (C), 130.5 (CH), 128.9 (C), 127.8 (C), 124.7 (CH), 111.9 (CH), 82.0 (C), 77.6 ( $\text{CH}_2$ ), 60.1 (C), 28.1 ( $\text{CH}_3$ ); MS(ESI) *m/z*: 364.0669 ( $\text{M}+\text{Na}$ )<sup>+</sup>,  $\text{C}_{14}\text{H}_{16}\text{ClN}_3\text{NaO}_5$  required 364.0671.

***tert*-Butyl (*S*)-(5-nitro-3-(nitromethyl)-2-oxoindolin-3-yl)carbamate (3j)**

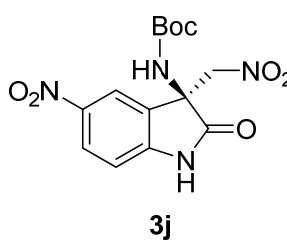

Purified by column chromatography eluting with hexane/EtOAc 70:30 (75.2 mg, 94% yield). The *ee* (6.6%) was determined by HPLC analysis, Chiralpak AD-H, hexane/*i*-PrOH 80:20, 1 mL/min, major enantiomer (*S*)  $t_r$  = 16.7 min, minor enantiomer (*R*)  $t_r$  = 18.1 min.

Yellow solid; mp 167-169 °C (hexane-EtOAc);  $^1\text{H}$  NMR (300 MHz,  $\text{CD}_3\text{OD}$ )  $\delta$  8.30-8.25 (m, 2H), 7.07 (dd, *J* = 8.4, 0.3 Hz, 1H), 5.04 (d, *J* = 13.2 Hz, 1H), 4.98 (d, *J* = 13.2 Hz, 1H), 1.32 (s, 9H);  $^{13}\text{C}$  NMR (75 MHz,  $\text{CDCl}_3$ )  $\delta$  177.3 (C), 150.1 (C), 144.6 (C), 129.7 (C), 128.0 (CH), 120.9 (CH), 111.4 (CH), 78.2 ( $\text{CH}_2$ ), 61.3 (C), 54.8 (C), 28.4 ( $\text{CH}_3$ ); MS(ESI) *m/z*: 375.0909 ( $\text{M}+\text{Na}$ )<sup>+</sup>,  $\text{C}_{14}\text{H}_{16}\text{N}_4\text{NaO}_7$  required 375.0911.



***tert*-Butyl (*S*)-(6-chloro-3-(nitromethyl)-2-oxoindolin-3-yl)carbamate (3k)**

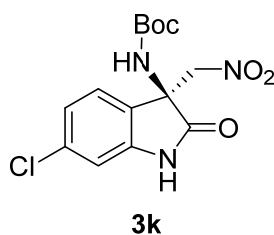

Purified by column chromatography eluting with hexane/EtOAc 70:30 (78.3 mg, 92% yield). The *ee* (96.2%) was determined by HPLC analysis, Chiralpak AD-H, hexane/*i*-PrOH 90:10, 1 mL/min, major enantiomer (*S*)  $t_r$  = 16.6 min, minor enantiomer (*R*)  $t_r$  = 23.6 min.

Yellow oil;  $[\alpha]_D^{20}$  -11.4 (*c* 1.0, CH<sub>2</sub>Cl<sub>2</sub>, 96.2% *ee*); <sup>1</sup>H NMR (300 MHz, CDCl<sub>3</sub>+CD<sub>3</sub>OD)  $\delta$  10.3 (s, 1H), 7.20 (d, *J* = 8.1 Hz, 1H), 6.92-6.85 (m, 2H), 6.24 (br s, 1H), 4.83 (d, *J* = 12.5 Hz, 1H), 4.58 (d, *J* = 12.5 Hz, 1H), 1.26 (s, 9H); <sup>13</sup>C NMR (75 MHz, CDCl<sub>3</sub>+CD<sub>3</sub>OD)  $\delta$  174.3 (C), 159.8 (C), 142.9 (C), 135.6 (C), 125.1 (CH), 122.3 (CH), 111.3 (CH), 80.9 (C), 59.6 (C), 27.9 (CH<sub>3</sub>); MS(ESI) *m/z*: 364.0674 (M+Na)<sup>+</sup>, C<sub>14</sub>H<sub>16</sub>ClN<sub>3</sub>NaO<sub>5</sub> required 364.0671.

***tert*-Butyl (*S*)-(7-chloro-3-(nitromethyl)-2-oxoindolin-3-yl)carbamate (3l)**

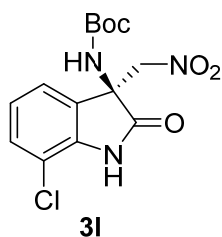

Purified by column chromatography eluting with hexane/EtOAc 70:30 (121.0 mg, 94% yield). The *ee* (98.1%) was determined by HPLC analysis, Chiralpak AD-H, hexane/*i*-PrOH 80:20, 1 mL/min, major enantiomer (*S*)  $t_r$  = 11.1 min, minor enantiomer (*R*)  $t_r$  = 19.1 min.

White solid; mp 172-175 °C (hexane-EtOAc);  $[\alpha]_D^{20}$  -31.9 (*c* 1.0, CH<sub>2</sub>Cl<sub>2</sub>, 98.1% *ee*); <sup>1</sup>H NMR (300 MHz, CDCl<sub>3</sub>)  $\delta$  8.14 (br s, 1H), 7.32 (dd, *J* = 8.4, 1.2 Hz, 1H), 7.23 (d, *J* = 6.9 Hz, 1H), 7.03 (t, *J* = 7.8 Hz, 1H), 6.14 (s, 1H), 4.89 (d, *J* = 12.6 Hz, 1H), 4.60 (d, *J* = 12.6 Hz, 1H), 1.34 (s, 9H); <sup>13</sup>C NMR (75 MHz, CDCl<sub>3</sub>)  $\delta$  173.2 (C), 153.6 (C), 148.5 (C), 138.1 (C), 130.3 (CH), 124.3 (CH), 122.5 (CH), 116.0 (C), 81.8 (C), 77.7 (CH<sub>2</sub>), 61.0 (C), 28.0 (CH<sub>3</sub>); MS(ESI) *m/z*: 364.0673 (M+Na)<sup>+</sup>, C<sub>14</sub>H<sub>16</sub>ClN<sub>3</sub>NaO<sub>5</sub> required 364.0671.

***tert*-Butyl (*S*)-(7-fluoro-3-(nitromethyl)-2-oxoindolin-3-yl)carbamate (3m)**

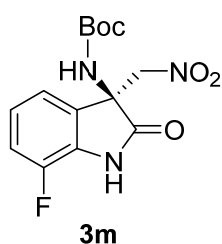

Purified by column chromatography eluting with hexane/EtOAc 70:30 (70.2 mg, 86% yield). The *ee* (93.1%) was determined by HPLC analysis, Chiralpak AD-H, hexane/*i*-PrOH 80:20, 1 mL/min, major enantiomer (*S*)  $t_r$  = 10.7 min, minor enantiomer (*R*)  $t_r$  = 15.9 min.

Yellow solid; mp 166-170 °C (hexane-EtOAc);  $[\alpha]_D^{20} +3.3$  (*c* 1.1, CH<sub>2</sub>Cl<sub>2</sub>, 93.1% *ee*); <sup>1</sup>H NMR (300 MHz, CDCl<sub>3</sub>) δ 8.43 (s, 1H), 7.14-7.00 (m, 3H), 6.20 (s, 1H), 4.91 (d, *J* = 12.6 Hz, 1H), 4.61 (d, *J* = 12.6 Hz, 1H), 1.34 (s, 9H); <sup>13</sup>C NMR (75 MHz, CD<sub>3</sub>OD) δ 176.8 (C), 155.6 (C), 148.7 (d, *J* = 242.3 Hz, C), 131.1 (d, *J* = 26.4 Hz, C), 124.4 (d, *J* = 5.9 Hz, CH), 120.6 (d, *J* = 3.4 Hz, CH), 118.0 (d, *J* = 17.5 Hz, C), 115.1 (d, *J* = 2.6 Hz, C), 82.0 (C), 78.7 (CH<sub>2</sub>), 61.8 (C), 28.3 (CH<sub>3</sub>); <sup>19</sup>F NMR (282 MHz, CD<sub>3</sub>OD) δ -136.2 (s, 1F); MS(ESI) *m/z*: 348.0963 (M+Na)<sup>+</sup>, C<sub>14</sub>H<sub>16</sub>FN<sub>3</sub>NaO<sub>5</sub> required 348.0966.

***tert*-Butyl (S)-(5,7-dimethyl-3-(nitromethyl)-2-oxoindolin-3-yl)carbamate (3n)**

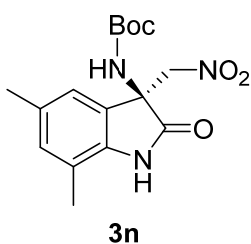

Purified by column chromatography eluting with hexane/EtOAc 70:30 (112.7 mg, 89% yield). The *ee* (98.7%) was determined by HPLC analysis, Chiralpak AD-H, hexane/*i*-PrOH 80:20, 1 mL/min, major enantiomer (*S*) *t<sub>r</sub>* = 9.0 min, minor enantiomer (*R*) *t<sub>r</sub>* = 13.9 min.

White solid; mp 189-193 °C (hexane-EtOAc);  $[\alpha]_D^{20} +17.4$  (*c* 1.0, CH<sub>2</sub>Cl<sub>2</sub>, 98.7% *ee*); <sup>1</sup>H NMR (300 MHz, CDCl<sub>3</sub>) δ 8.76 (br s, 1H), 6.95 (s, 1H), 6.93 (s, 1H), 6.17 (s, 1H), 4.83 (d, *J* = 12.3 Hz, 1H), 4.61 (d, *J* = 12.3 Hz, 1H), 2.27 (s, 3H), 2.19 (s, 3H), 1.33 (s, 9H); <sup>13</sup>C NMR (75 MHz, CDCl<sub>3</sub>) δ 174.8 (C), 153.8 (C), 136.5 (C), 133.0 (CH), 132.3 (CH), 126.1 (C), 122.0 (C), 119.8 (C), 81.4 (C), 78.1 (CH<sub>2</sub>), 60.7 (C), 28.0 (CH<sub>3</sub>), 21.0 (CH<sub>3</sub>), 16.2 (CH<sub>3</sub>); MS(ESI) *m/z*: 358.1375 (M+Na)<sup>+</sup>, C<sub>16</sub>H<sub>21</sub>N<sub>3</sub>NaO<sub>5</sub> required 358.1373.

***tert*-Butyl (S)-3-(1-nitroethyl)-2-oxoindolin-3-yl)carbamate (6a)**

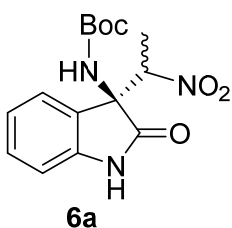

Purified by column chromatography eluting with hexane/EtOAc 70:30 (55.8 mg, 68% yield). Diastereomer ratio 91:09. The *ee* (99.8% major diastereomer, 99.1% minor diastereomer) was determined by HPLC analysis, Chiralpak AD-H, hexane/*i*-PrOH 80:20, 1 mL/min, Major diastereomer: major enantiomer (3*S*) *t<sub>r</sub>* = 9.2 min, minor enantiomer (3*R*) *t<sub>r</sub>* = 15.5 min; Minor diastereomer: major enantiomer (3*S*) *t<sub>r</sub>* = 7.8 min, minor enantiomer (3*R*) *t<sub>r</sub>* = 10.9 min.

White solid; mp 159-162 °C (hexane-CH<sub>2</sub>Cl<sub>2</sub>);  $[\alpha]_D^{20} +39.2$  (*c* 0.9, CH<sub>2</sub>Cl<sub>2</sub>) for the diastereomer mixture. Major diastereomer: <sup>1</sup>H NMR (300 MHz, CDCl<sub>3</sub>) δ 8.53 (s, 1H), 7.23 (td, *J* = 7.8, 1.2 Hz, 1H), 7.10 (dd, *J* = 7.5, 0.9 Hz, 1H), 7.03 (td, *J* = 7.5, 0.9 Hz, 1H), 6.81 (d, *J* = 7.8 Hz, 1H), 6.26 (s, 1H), 4.72 (q, *J* = 6.9 Hz, 1H), 1.76 (d, *J* = 6.9

Hz, 3H), 1.32 (s, 9H);  $^{13}\text{C}$  NMR (75 MHz,  $\text{CDCl}_3$ )  $\delta$  174.0 (C), 154.1 (C), 140.4 (C), 130.2 (CH), 126.7 (C), 123.3 (CH), 123.1 (CH), 110.7 (CH), 85.5 (CH), 81.4 (C), 62.1 (C), 28.0 ( $\text{CH}_3$ ), 13.0 ( $\text{CH}_3$ ); MS(ESI)  $m/z$ : 344.1215 ( $\text{M}+\text{Na}$ ) $^+$ ,  $\text{C}_{15}\text{H}_{19}\text{N}_3\text{NaO}_5$  required 344.1217.

Minor diastereomer:  $^1\text{H}$  NMR (300 MHz,  $\text{CDCl}_3$ , representative peaks taken from the diastereomer mixture)  $\delta$  6.30 (s, 1H), 4.96 (q,  $J = 6.9$  Hz, 1H).

***tert*-Butyl (*S*)-(3-(1-nitropropyl)-2-oxoindolin-3-yl)carbamate (**7a**)**

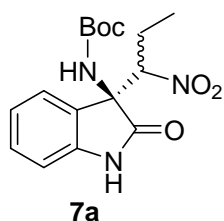

Purified by column chromatography eluting with hexane/EtOAc 70:30 (62.7 mg, 75% yield). Diastereomer ratio 91:9. The *ee* (99.6% major diastereomer, 98.0% minor diastereomer) was determined by HPLC analysis, Chiralpak AD-H, hexane/*i*-PrOH 90:10, 1 mL/min, Major diastereomer: major enantiomer (*3S*)  $t_r = 14.1$  min, minor

enantiomer (*3R*)  $t_r = 21.3$  min; Minor diastereomer: major enantiomer (*3S*)  $t_r = 15.4$  min, minor enantiomer (*3R*)  $t_r = 25.8$  min.

White solid; mp 170-172  $^\circ\text{C}$  (hexane-  $\text{CH}_2\text{Cl}_2$ );  $[\alpha]_D^{20} +18.2$  ( $c$  1.1,  $\text{CH}_2\text{Cl}_2$ ) for the diastereomer mixture. Major diastereomer:  $^1\text{H}$  NMR (300 MHz,  $\text{CDCl}_3$ )  $\delta$  8.25 (s, 1H), 7.23 (td,  $J = 7.5, 1.5$  Hz, 1H), 7.07-6.98 (m, 2H), 6.79 (d,  $J = 7.8$  Hz, 1H), 6.25 (s, 1H), 4.41 (dd,  $J = 12.0, 2.7$  Hz, 1H), 2.57-2.43 (m, 1H), 2.23-2.12 (m, 1H), 1.32 (s, 9H), 0.96 (t,  $J = 7.2$  Hz, 3H);  $^{13}\text{C}$  NMR (75 MHz,  $\text{CDCl}_3$ )  $\delta$  174.0 (C), 154.0 (C), 140.2 (C), 130.1 (CH), 124.8 (C), 123.3 (CH), 122.9 (CH), 110.6 (CH), 92.8 (CH), 81.4 (C), 61.9 (C), 28.1 ( $\text{CH}_3$ ), 20.3 ( $\text{CH}_2$ ), 10.5 ( $\text{CH}_3$ ); MS(ESI)  $m/z$ : 358.1376 ( $\text{M}+\text{Na}$ ) $^+$ ,  $\text{C}_{16}\text{H}_{21}\text{N}_3\text{NaO}_5$  required 358.1373.

Minor diastereomer:  $^1\text{H}$  NMR (300 MHz,  $\text{CDCl}_3$ , representative peaks taken from the diastereomer mixture)  $\delta$  5.98 (s, 1H), 4.76 (dd,  $J = 10.7, 3.4$  Hz, 1H), 1.88-1.68 (m, 2H), 0.90 (t,  $J = 7.2$  Hz, 3H).

***tert*-Butyl (S)-(6-chloro-3-(1-nitroethyl)-2-oxoindolin-3-yl)carbamate (6k)**

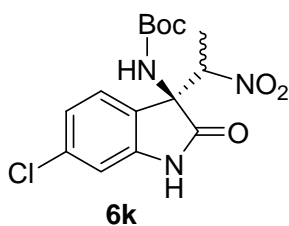

Purified by column chromatography eluting with hexane/EtOAc 70:30 (88.3 mg, 95% yield). Diastereomer ratio 60:40. The *ee* (91.7% major diastereomer, 88.8% minor diastereomer) was determined by HPLC analysis, Chiralpak AD-H, hexane/*i*-PrOH 80:20, 1 mL/min, Major diastereomer: major enantiomer (3*S*)  $t_r = 7.3$  min, minor enantiomer (3*R*)  $t_r = 11.0$  min; Minor diastereomer: major enantiomer (3*S*)  $t_r = 6.5$  min, minor enantiomer (3*R*)  $t_r = 9.1$  min.

The major diastereomer could be obtained in 91:9 dr after crystallization from CH<sub>2</sub>Cl<sub>2</sub>. Yellow solid; mp 182 °C(dec.) (hexane-DCM);  $[\alpha]_D^{20} +17.1$  (*c* 1.0, CH<sub>2</sub>Cl<sub>2</sub>) for the 91:9 dr mixture; Major diastereomer: <sup>1</sup>H NMR (300 MHz, CDCl<sub>3</sub>) δ 8.64 (s, 1H), 6.99 (d, *J* = 1.2 Hz, 2H), 6.73 (s, 1H), 6.31 (s, 1H), 4.65 (q, *J* = 6.9 Hz, 1H), 1.79 (d, *J* = 6.9 Hz, 3H), 1.37 (s, 9H); <sup>13</sup>C NMR (75 MHz, CDCl<sub>3</sub>) δ 173.5 (C), 154.2 (C), 141.6 (C), 136.0 (C), 125.5 (C), 123.9 (CH), 123.3 (CH), 111.5 (CH), 85.4 (CH), 81.8 (C), 61.7 (C), 28.1 (CH<sub>3</sub>), 13.0 (CH<sub>3</sub>); MS(ESI) *m/z*: 378.0829 (M+Na)<sup>+</sup>, C<sub>15</sub>H<sub>18</sub>ClN<sub>3</sub>NaO<sub>5</sub> required 378.0827.

Minor diastereomer: <sup>1</sup>H NMR (300 MHz, CDCl<sub>3</sub>, representative peaks taken from the diastereomer mixture) δ 8.60 (s, 1H), 7.01 (d, *J* = 1.5 Hz, 1H), 6.78 (s, 1H), 6.35 (s, 1H), 4.94 (q, *J* = 6.6 Hz, 1H).

***tert*-Butyl (S)-(6-chloro-3-(1-nitropropyl)-2-oxoindolin-3-yl)carbamate (7k)**

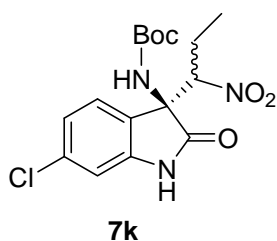

Purified by column chromatography eluting with hexane/EtOAc 70:30 (80.9 mg, 91% yield). Diastereomer ratio 85:15. The *ee* (87.8% major diastereomer, 78.8% minor diastereomer) was determined by HPLC analysis, Chiralpak AD-H, hexane/*i*-PrOH 80:20, 1 mL/min, Major diastereomer: major enantiomer (S)  $t_r = 6.3$  min, minor enantiomer (R)  $t_r = 8.6$  min; Minor diastereomer: major enantiomer (S)  $t_r = 7.3$  min, minor enantiomer (R)  $t_r = 9.6$  min.

White solid; mp 196 °C (dec.)(hexane-CH<sub>2</sub>Cl<sub>2</sub>);  $[\alpha]_D^{20} -6.8$  (*c* 1.2, CH<sub>2</sub>Cl<sub>2</sub>) for the diastereomer mixture; Major diastereomer: <sup>1</sup>H NMR (300 MHz, CDCl<sub>3</sub>) δ 8.41 (s, 1H), 7.20-6.93 (m, 2H), 6.73 (s, 1H), 6.28 (s, 1H), 4.36 (dd, *J* = 12.0, 2.7 Hz, 1H), 2.58-2.43 (m, 1H), 2.27-2.10 (m, 1H), 1.36 (s, 9H), 0.96 (t, *J* = 7.5 Hz, 3H); <sup>13</sup>C NMR (75 MHz, CDCl<sub>3</sub>) δ 173.6 (C), 154.2 (C), 141.5 (C), 136.0 (C), 125.6 (C), 123.7 (CH), 123.3

(CH), 111.4 (CH), 92.7 (CH), 81.8 (C), 61.6 (C), 28.1 (CH<sub>3</sub>), 20.3 (CH<sub>2</sub>), 10.4 (CH<sub>3</sub>); MS(ESI) *m/z*: 392.0982 (M+Na)<sup>+</sup>, C<sub>16</sub>H<sub>20</sub>ClN<sub>3</sub>NaO<sub>5</sub> required 392.0984.

Minor diastereomer: <sup>1</sup>H NMR (300 MHz, CDCl<sub>3</sub>, representative peaks taken from the diastereomer mixture) δ 8.35 (s, 1H), 5.96 (s, 1H), 4.73 (dd, *J* = 11.4, 3.0 Hz, 1H), 0.90 (t, *J* = 7.5 Hz, 3H).

***tert*-Butyl (S)-(7-chloro-3-(1-nitroethyl)-2-oxindolin-3-yl)carbamate (6I)**

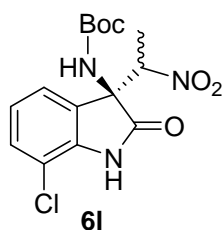

Purified by column chromatography eluting with hexane/EtOAc 70:30 (78.1 mg, 91% yield). Diastereomer ratio 76:24. The *ee* (98.9% mayor diastereomer, 99.9% minor diastereomer) was determined by HPLC analysis, Chiralpak AD-H, hexane/*i*-PrOH 80:20, 1 mL/min, Major diastereomer: major enantiomer (*S*) *t<sub>r</sub>* = 9.31 min, minor enantiomer (*R*) *t<sub>r</sub>* = 29.7 min; Minor diastereomer: major enantiomer (*S*) *t<sub>r</sub>* = 8.6, minor enantiomer (*R*) *t<sub>r</sub>* = 14.2 min.

White solid; mp 170-172 °C (hexane-DCM); [α]<sub>D</sub><sup>20</sup> -22 (*c* 1.1, MeOH) for the diastereomeric mixture. Major diastereomer: <sup>1</sup>H NMR (300 MHz, CDCl<sub>3</sub>) δ 7.97 (s, 1H), 7.27-7.20 (m, 1H), 6.97-6.93 (m, 2H), 6.19 (s, 1H), 4.62 (q, *J* = 6.9 Hz, 1H), 1.73 (d, *J* = 6.9 Hz, 3H), 1.24 (s, 9H); <sup>13</sup>C NMR (75 MHz, CDCl<sub>3</sub>) δ 173.8 (C), 153.9 (C), 137.9 (C), 130.1 (CH), 124.3 (CH), 121.5 (CH), 115.8 (C), 85.3 (CH), 81.7 (C), 63.0 (C), 28.0 (CH<sub>3</sub>), 13.0 (CH<sub>3</sub>); MS(ESI) *m/z*: 378.0826 (M+Na)<sup>+</sup>, C<sub>15</sub>H<sub>18</sub>ClN<sub>3</sub>NaO<sub>5</sub> required 378.0827.

Minor diastereomer: <sup>1</sup>H NMR (300 MHz, CDCl<sub>3</sub>, representative peaks taken from the diastereomer mixture) δ 8.01 (s, 1H), 6.16 (s, 1H), 4.90 (q, *J* = 6.6 Hz, 1H), 1.31 (d, *J* = 6.9 Hz, 3H).

***tert*-Butyl (S)-(7-chloro-3-(1-nitropropyl)-2-oxindolin-3-yl)carbamate (7I)**

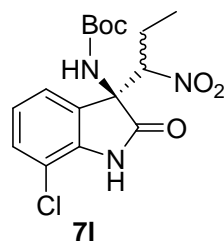

Purified by column chromatography eluting with hexane/EtOAc 70:30 (66.7 mg, 89% yield). Diastereomer ratio 88:12. The *ee* (99.8% mayor diastereomer, 99.8% minor diastereomer) was determined by HPLC analysis, Chiralpak AD-H, hexane/*i*-PrOH 80:20, 1 mL/min, Major diastereomer: major enantiomer (*S*) *t<sub>r</sub>* = 8.7 min, minor enantiomer (*R*) *t<sub>r</sub>* = 15.1 min; Minor diastereomer: major enantiomer (*S*) *t<sub>r</sub>* = 9.4 min, minor enantiomer (*R*) *t<sub>r</sub>* = 16.0 min.

The major diastereomer was obtained pure after crystallization from hexane-CH<sub>2</sub>Cl<sub>2</sub>: White solid; mp 214-216 °C (hexane-DCM);  $[\alpha]_D^{20}$  -12.7 (*c* 0.9, MeOH, 100% *ee*) for the pure major diastereomer; <sup>1</sup>H NMR (300 MHz, CDCl<sub>3</sub>) δ 7.86 (br s, 1H), 7.29 (dd, *J* = 7.8, 1.5 Hz, 1H), 7.00 (t, *J* = 7.5 Hz, 1H), 6.95 (dd, *J* = 7.8, 1.5 Hz, 1H), 6.23 (s, 1H), 4.39 (dd, *J* = 12, 2.7 Hz, 1H), 2.50 (m, 1H), 2.20 (m, 1H), 1.31 (s, 9H), 0.97 (t, *J* = 7.5 Hz, 3H); <sup>13</sup>C NMR (75 MHz, CDCl<sub>3</sub>) δ 173.2 (C), 153.7 (C), 137.6 (C), 130.1 (CH), 124.3 (CH), 121.3 (CH), 120.1 (C), 115.7 (C), 92.5 (CH), 90.3 (C), 62.9 (C), 28.0 (CH<sub>3</sub>), 20.2 (CH<sub>2</sub>), 10.5 (CH<sub>3</sub>); MS(ESI) *m/z*: 392.0984 (M+Na)<sup>+</sup>, C<sub>16</sub>H<sub>20</sub>ClN<sub>3</sub>NaO<sub>5</sub> required 392.0984.

Minor diastereomer: <sup>1</sup>H NMR (300 MHz, CDCl<sub>3</sub>, representative peaks taken from the diastereomer mixture) δ 8.06 (s, 1H), 5.93 (s, 1H), 4.75 (dd, *J* = 11.1, 3.3 Hz, 1H), 0.91 (t, *J* = 7.2 Hz, 3H).

## Transformations of nitroamine 3a

### Deprotection of the Boc moiety.<sup>4</sup> (*S*)-3-amino-3-(nitromethyl)indolin-2-one (**8**)

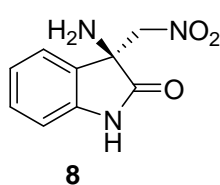

Trifluoroacetic acid (1.1 mL) was added dropwise to a stirred solution of compound **3a** (101.0 mg, 0.33 mmol, 96% *ee*) in CH<sub>2</sub>Cl<sub>2</sub> (5 mL) at 0 °C and stirred during 2 hours at room temperature. The reaction was concentrated, diluted with CH<sub>2</sub>Cl<sub>2</sub> (15 mL), washed with NaHCO<sub>3</sub>, dried over MgSO<sub>4</sub> and concentrated under reduced pressure to give 65.5 mg (96%) of compound **8**: The *ee* (95.6%) was determined by HPLC analysis, Chiralpak AD-H, hexane/*i*-PrOH 80:20, 1 mL/min, major enantiomer (*S*) *t<sub>r</sub>* = 14.9 min, minor enantiomer (*R*) *t<sub>r</sub>* = 12.8 min.  $[\alpha]_D^{20}$  +53.9 (*c* 0.8, MeOH, 95% *ee*); <sup>1</sup>H NMR (300 MHz, CD<sub>3</sub>CN) δ 8.69 (br s, 1H), 7.37 (dq, *J* = 7.5, 0.6 Hz, 1H), 7.29 (td, *J* = 7.5, 1.5 Hz, 1H), 7.05 (td, *J* = 7.8, 0.9 Hz, 1H), 6.94 (ddd, *J* = 7.5, 0.9, 0.6 Hz, 1H), 4.89 (d, *J* = 12.9 Hz, 1H), 4.83 (d, *J* = 12.9 Hz, 1H); <sup>13</sup>C NMR (75 MHz, CD<sub>3</sub>CN) δ 178.9 (C), 142.9 (C), 131.0 (CH), 129.7 (C), 125.0 (CH), 123.4 (CH), 111.3 (CH), 80.5 (CH<sub>2</sub>), 60.4 (C); MS(ESI) *m/z*: 230.0538 (M+Na)<sup>+</sup>, C<sub>9</sub>H<sub>9</sub>N<sub>3</sub>NaO<sub>3</sub> required 230.0536.

## Synthesis of diamines **9** and **10**

### *tert*-Butyl (*S*)-(3-(aminomethyl)-2-oxoindolin-3-yl)carbamate (**9**)

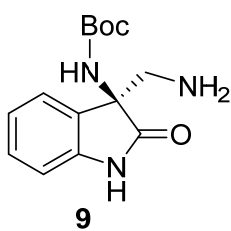

To a solution of compound **3a** (100.0 mg, 0.33 mmol) in methanol (2.4 mL) at 0 °C was added NiCl<sub>2</sub> (44 mg, 0.34 mmol) followed by NaBH<sub>4</sub> (61.7 mg, 1.63 mmol) and the mixture was stirred for 30 min.<sup>5</sup> Then, saturated aqueous NH<sub>4</sub>Cl (10 mL) was added and the mixture extracted with ethyl acetate (4×30 mL), washed with brine (15 mL), dried over MgSO<sub>4</sub> and concentrated under reduced pressure. The crude was filtered through a short pad of silica gel eluting with CH<sub>2</sub>Cl<sub>2</sub>:MeOH:Et<sub>3</sub>N (90:10:1) and concentrated under reduced pressure to give 90.0 mg (99%) of compound **5a**: The *ee* (95.8%) was determined by HPLC analysis, Chiralpak AY-H, hexane/*i*-PrOH 80:20, 1 mL/min, major enantiomer (*S*) *t*<sub>r</sub> = 8.6 min, minor enantiomer (*R*) *t*<sub>r</sub> = 17.1 min. [α]<sub>D</sub><sup>20</sup> +35.8 (*c* 1.0, MeOH, 95.8% *ee*); <sup>1</sup>H NMR (300 MHz, CD<sub>3</sub>OD) δ 7.30-7.23 (m, 2H), 7.06 (t, *J* = 7.5 Hz, 1H), 6.92 (dt, *J* = 7.8, 0.9 Hz, 1H), 3.03 (d, *J* = 13.8 Hz, 1H), 2.85 (d, *J* = 13.5 Hz, 1H), 1.29 (br s, 9H); <sup>13</sup>C NMR (75 MHz, CD<sub>3</sub>OD) δ 180.1 (C), 156.5 (C), 142.8 (C), 129.9 (CH), 127.8 (C), 123.7 (CH), 123.6 (CH), 111.3 (CH), 81.3 (C), 63.7 (C), 48.9 (CH<sub>2</sub>), 28.4 (CH<sub>3</sub>); MS(ESI) *m/z*: 300.1315 (M+Na)<sup>+</sup>, C<sub>14</sub>H<sub>19</sub>N<sub>3</sub>NaO<sub>3</sub> required 300.1319

### (*S*)-3-amino-3-(aminomethyl)indolin-2-one (**10**)

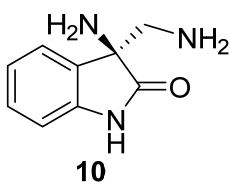

A 1M solution of HCl in diethyl ether (6.2 mL, 6.2 mmol) was added dropwise to a solution of compound **9** (85 mg, 0.31 mmol) in methanol at 0 °C. The reaction was stirred overnight at room temperature and concentrated under reduced pressure. The mixture was dissolved with ethyl acetate (2 mL), basified with 1 M aqueous NaOH (2 mL), extracted with EtOAc (4×30 mL), dried over MgSO<sub>4</sub> and concentrated under reduced pressure to give 35.5 mg (65%) of diamine **10**: [α]<sub>D</sub><sup>20</sup> +53.2 (*c* 0.6, MeOH); <sup>1</sup>H NMR (300 MHz, CD<sub>3</sub>OD) δ 7.39 (dq, *J* = 7.5, 0.6 Hz, 1H), 7.27 (td, *J* = 7.5, 1.5 Hz, 1H), 7.07 (td, *J* = 7.5, 1.2 Hz, 1H), 6.93 (dt, *J* = 7.8, 0.6 Hz, 1H), 2.94 (d, *J* = 13.2 Hz, 1H), 2.89 (d, *J* = 13.2 Hz, 1H); <sup>13</sup>C NMR (75 MHz, CD<sub>3</sub>OD) δ 182.8 (C), 143.1 (C), 132.2 (C), 130.4 (CH), 124.9 (CH), 123.7 (CH), 111.3 (CH), 62.9 (C), 49.9 (CH<sub>2</sub>); MS(ESI) *m/z*: 200.0792 (M+Na)<sup>+</sup>, C<sub>14</sub>H<sub>19</sub>N<sub>3</sub>NaO<sub>3</sub> required 200.0794.

## Synthesis of nitrile **12** and ester **13**

### *tert*-Butyl (*S*)-(3-cyano-2-oxoindolin-3-yl)carbamate (**12**)

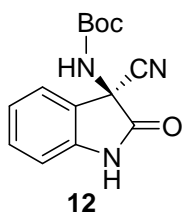

Compound **3a** (70 mg, 0.23 mmol) was added to a solution of  $\text{SnCl}_2 \cdot 2\text{H}_2\text{O}$  (102.9 mg, 0.46 mmol), thiophenol (140  $\mu\text{L}$ , 1.37 mmol) and triethylamine (190  $\mu\text{L}$ , 1.37 mmol) in absolute EtOH (1.2 mL) at room temperature. After 20 min, the reaction mixture was poured into 1M aqueous HCl (5 mL) and  $\text{CH}_2\text{Cl}_2$  (6 mL) at 0 °C. The layers were separated and the aqueous layer was extracted with  $\text{CH}_2\text{Cl}_2$  (3 x 20 mL). The organic layer was washed with aqueous  $\text{NaHCO}_3$  (3 mL), brine (3 mL) and dried over  $\text{MgSO}_4$ . After removal of the solvent, the residue was chromatographed through a short plug of silica gel eluting with hexane/EtOAc 6:4 to remove the excess of thiophenol and then with EtOAc. The EtOAc fraction was concentrated under reduced pressure to give 50.1 mg (75%) of a stereoisomeric mixture of oximes **11**. To the solution of oximes **11** in THF (1.8 mL) at 0 °C under nitrogen atmosphere was added triethylamine (119  $\mu\text{L}$ , 119 mmol) and  $\text{SOCl}_2$  (25  $\mu\text{L}$ , 0.34 mmol). After 45 min, water (4 mL) was added and the mixture extracted with EtOAc (2 x 30 mL), washed with brine (3 mL), dried over  $\text{MgSO}_4$  and concentrated under reduced pressure. Column chromatography eluting with hexane/EtOAc 6:4 gave 39.6 mg (84%) of compound **12**. The *ee* (94.8%) was determined by HPLC analysis, Chiralpak IC, hexane/*i*-PrOH 90:10, 1 mL/min, major enantiomer (*S*)  $t_r = 17.3$  min, minor enantiomer (*R*)  $t_r = 21.0$  min.  $[\alpha]_D^{20} -21.6$  (*c* 1.3, MeOH, 94.8% *ee*),  $[\alpha]_D^{20} -53.0$  (*c* 0.6,  $\text{CHCl}_3$ , 94.8% *ee*), Lit.<sup>6</sup>  $[\alpha]_D^{20} +55$  (*c* 1.0,  $\text{CHCl}_3$ , 91% *ee*, for the *R*-enantiomer);  $^1\text{H}$  NMR (300 MHz,  $\text{CD}_3\text{OD}$ )  $\delta$  7.50 (d,  $J = 7.2$  Hz, 1H), 7.37 (td,  $J = 7.8, 1.2$  Hz, 1H), 7.13 (td,  $J = 8.7, 0.9$  Hz, 1H), 6.97 (ddd,  $J = 7.8, 1.2, 0.9$  Hz, 1H), 1.33 (s, 9H);  $^{13}\text{C}$  NMR (75 MHz,  $\text{CD}_3\text{OD}$ )  $\delta$  171.8 (C), 155.7 (C), 143.1 (C), 132.3 (CH), 127.5 (C), 125.4 (C), 124.6 (CH), 116.2 (C), 112.1 (CH), 82.5 (C), 28.4 ( $\text{CH}_3$ ); MS(ESI)  $m/z$ : 296.1009 ( $\text{M}+\text{Na}$ )<sup>+</sup>,  $\text{C}_{14}\text{H}_{15}\text{N}_3\text{NaO}_3$  required 296.1006.

### Methyl (*R*)-3-amino-2-oxoindoline-3-carboxylate (**13**)

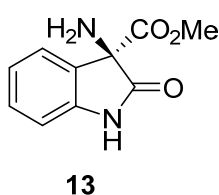

Dry HCl was bubbled through a solution of compound **12** (36 mg, 0.13 mmol) in anhydrous methanol (3.0 mL) at 0 °C for 3 + 2 min.<sup>7</sup> The mixture was stirred for 24 h at room temperature. Saturated aqueous  $\text{NaHCO}_3$  (5 mL) was added. MeOH was removed under reduced pressure and the aqueous layer was extracted with  $\text{CH}_2\text{Cl}_2$  (2x30 mL) and dried



with MgSO<sub>4</sub>. Removal of the solvents under reduced pressure gave 17.0 mg (61%) of ester **13**: The *ee* (92%) was determined by HPLC analysis, Chiralpak AD-H, hexane/*i*-PrOH 80:20, 1 mL/min, major enantiomer (*R*) *t<sub>r</sub>* = 12.5 min, minor enantiomer (*S*) *t<sub>r</sub>* = 11.5 min.  $[\alpha]_{\text{D}}^{20} +113.4$  (*c* 1.3, MeOH, 92% *ee*), Lit<sup>7</sup>  $[\alpha]_{\text{D}}^{20} -114$  (for the *S*-enantiomer); <sup>1</sup>H NMR (300 MHz, CD<sub>3</sub>OD)  $\delta$  7.33-7.27 (m, 2H), 7.04 (td, *J* = 7.5, 0.9, 1H), 6.94 (td, *J* = 8.1, 0.6, 1H), 3.67 (s, 3H); <sup>13</sup>C NMR (75 MHz, CD<sub>3</sub>OD)  $\delta$  178.3 (C), 171.7 (C), 143.9 (C), 131.2 (CH), 130.8 (C), 124.8 (CH), 123.9 (CH), 111.5 (CH), 66.9 (C), 53.6 (CH<sub>3</sub>); MS(ESI) *m/z*: 229.0586 (M+Na)<sup>+</sup>, C<sub>10</sub>H<sub>10</sub>N<sub>2</sub>NaO<sub>3</sub> required 229.0584.

### Notes and references

1. (a) H. Jie, J. Li, X. Jia, *Synlett* 2012, **23**, 2274. (b) D. J. Vyas, R. Frohlich, M. Oestreich, *J. Org. Chem.* 2010, **75**, 6720.
2. P. Cali, M. Begtrup, *Synthesis* 2002, 63.
3. (a) W. Yan, D. Wang, J. Feng, P. Li, D. Zhao, R. Wang, *Org. Lett.* 2012, **14**, 2512. (b) M. G. Sankar, M. Garcia-Castro, Y. Wang, K. Kumar, *Asian J. Org. Chem.* 2013, **2**, 646.
4. Chen X.; Chen H.; Ji X.; Jiang H.; Yao Z.; Liu H.; *Org. Lett.* 2013, 15, 1846.
5. Wei Y.; He W.; Liu Y.; Liu P.; Zhang S.; *Org. Lett.* 2012, 14, 704-707.
6. D. Wang, J. Liang, J. Feng, K. Wang, Q. Sun, L. Zhao, D. Li, W. Yan, R. Wang, *Adv. Synth. Catal.* 2013, **355**, 548
7. When we carried out the reaction bubbling HCl for 15 min the *ee* of compound **13** decreased to 81%.

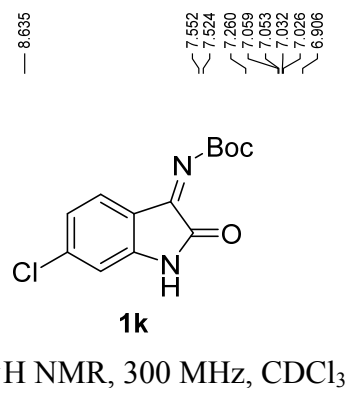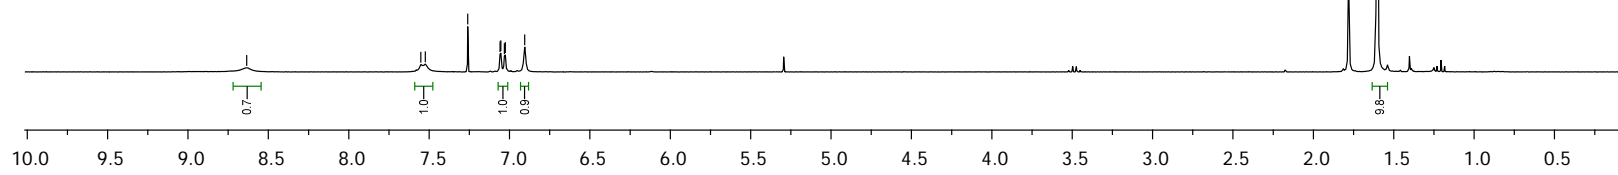

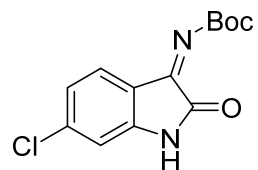

**1k**

$^{13}\text{C}$  NMR, 75 MHz,  $\text{CDCl}_3$

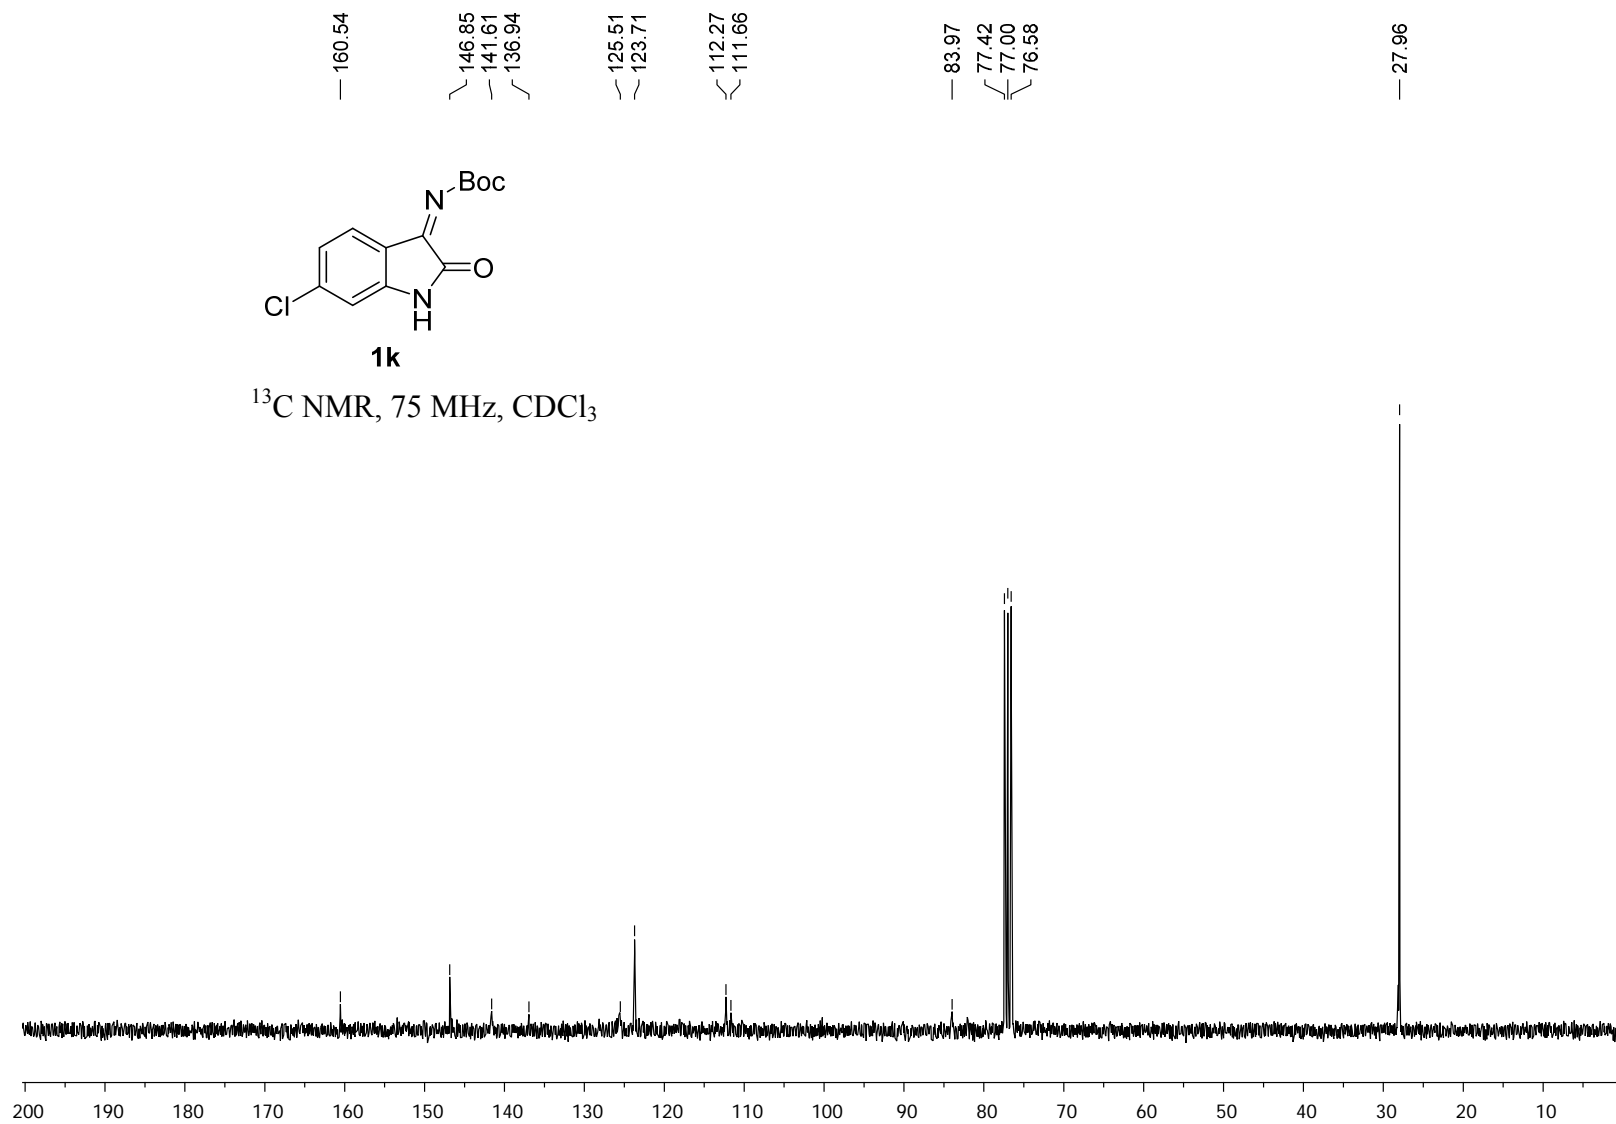

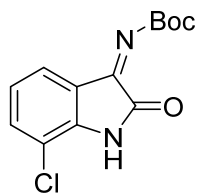

**11**

$^1\text{H NMR}$ , 300 MHz,  $\text{CDCl}_3$

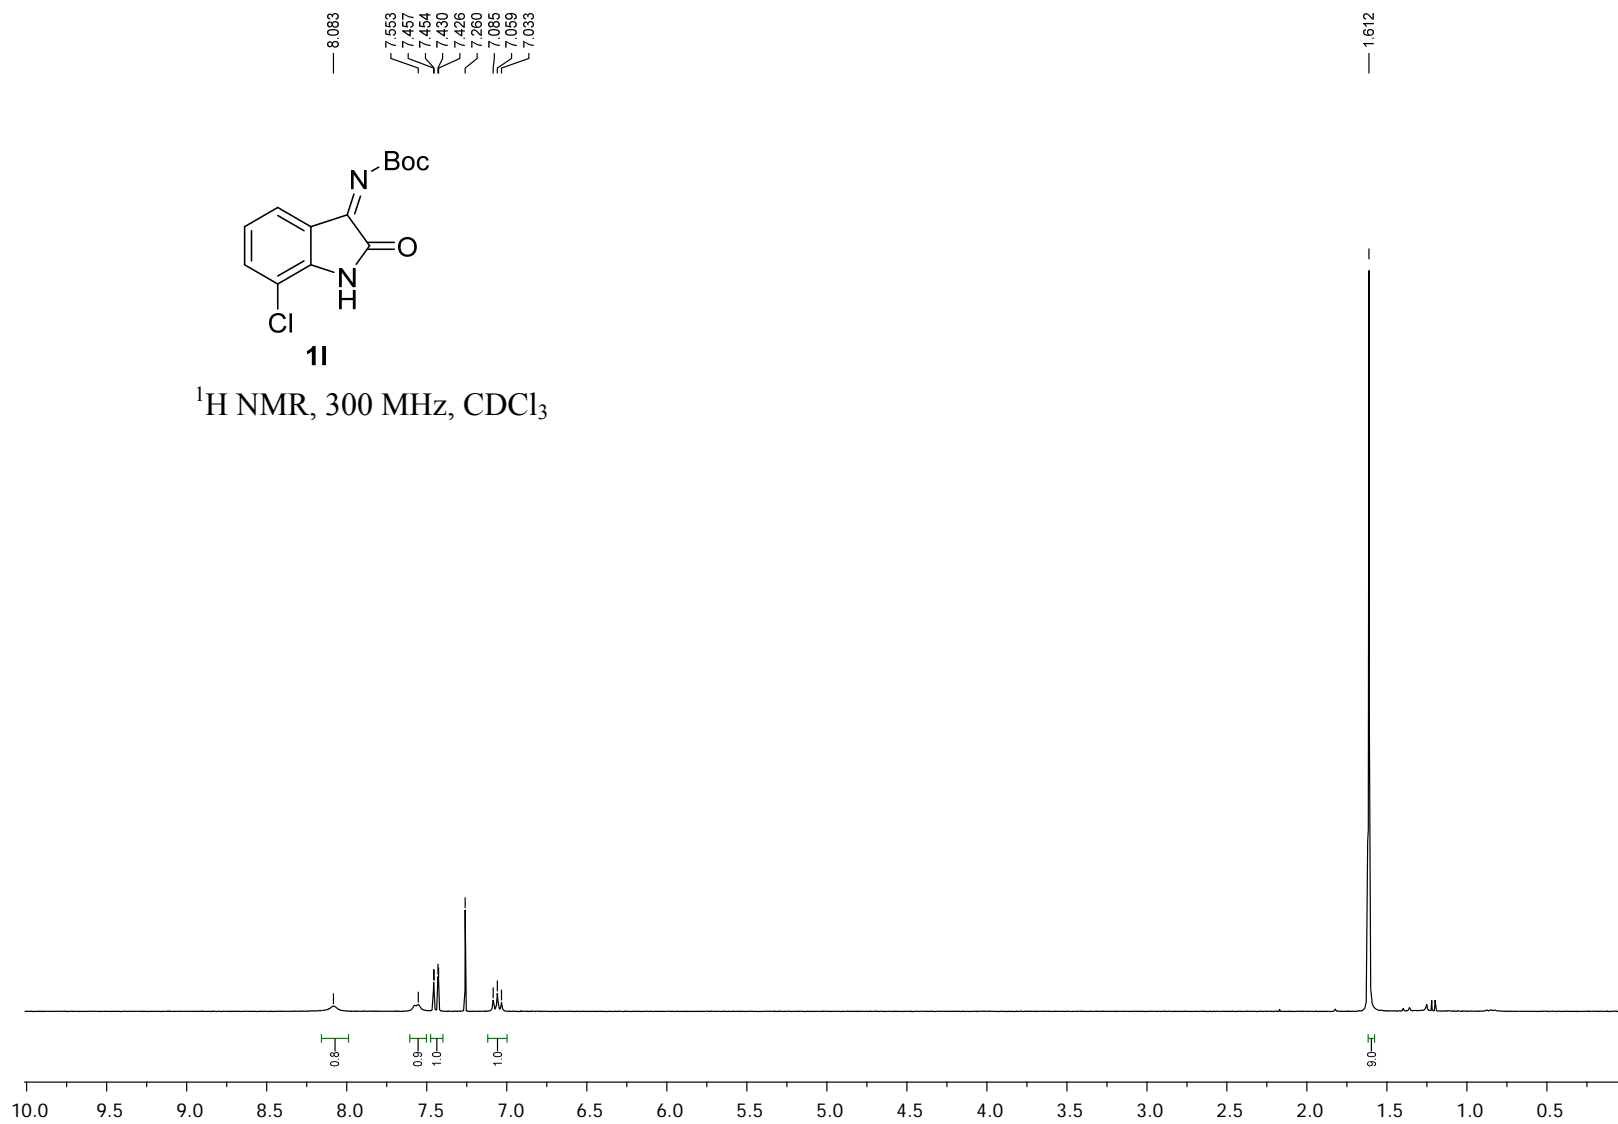

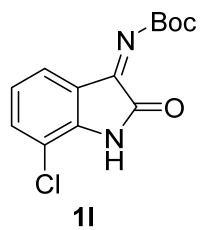

$^{13}\text{C}$  NMR, 75 MHz, DMSO

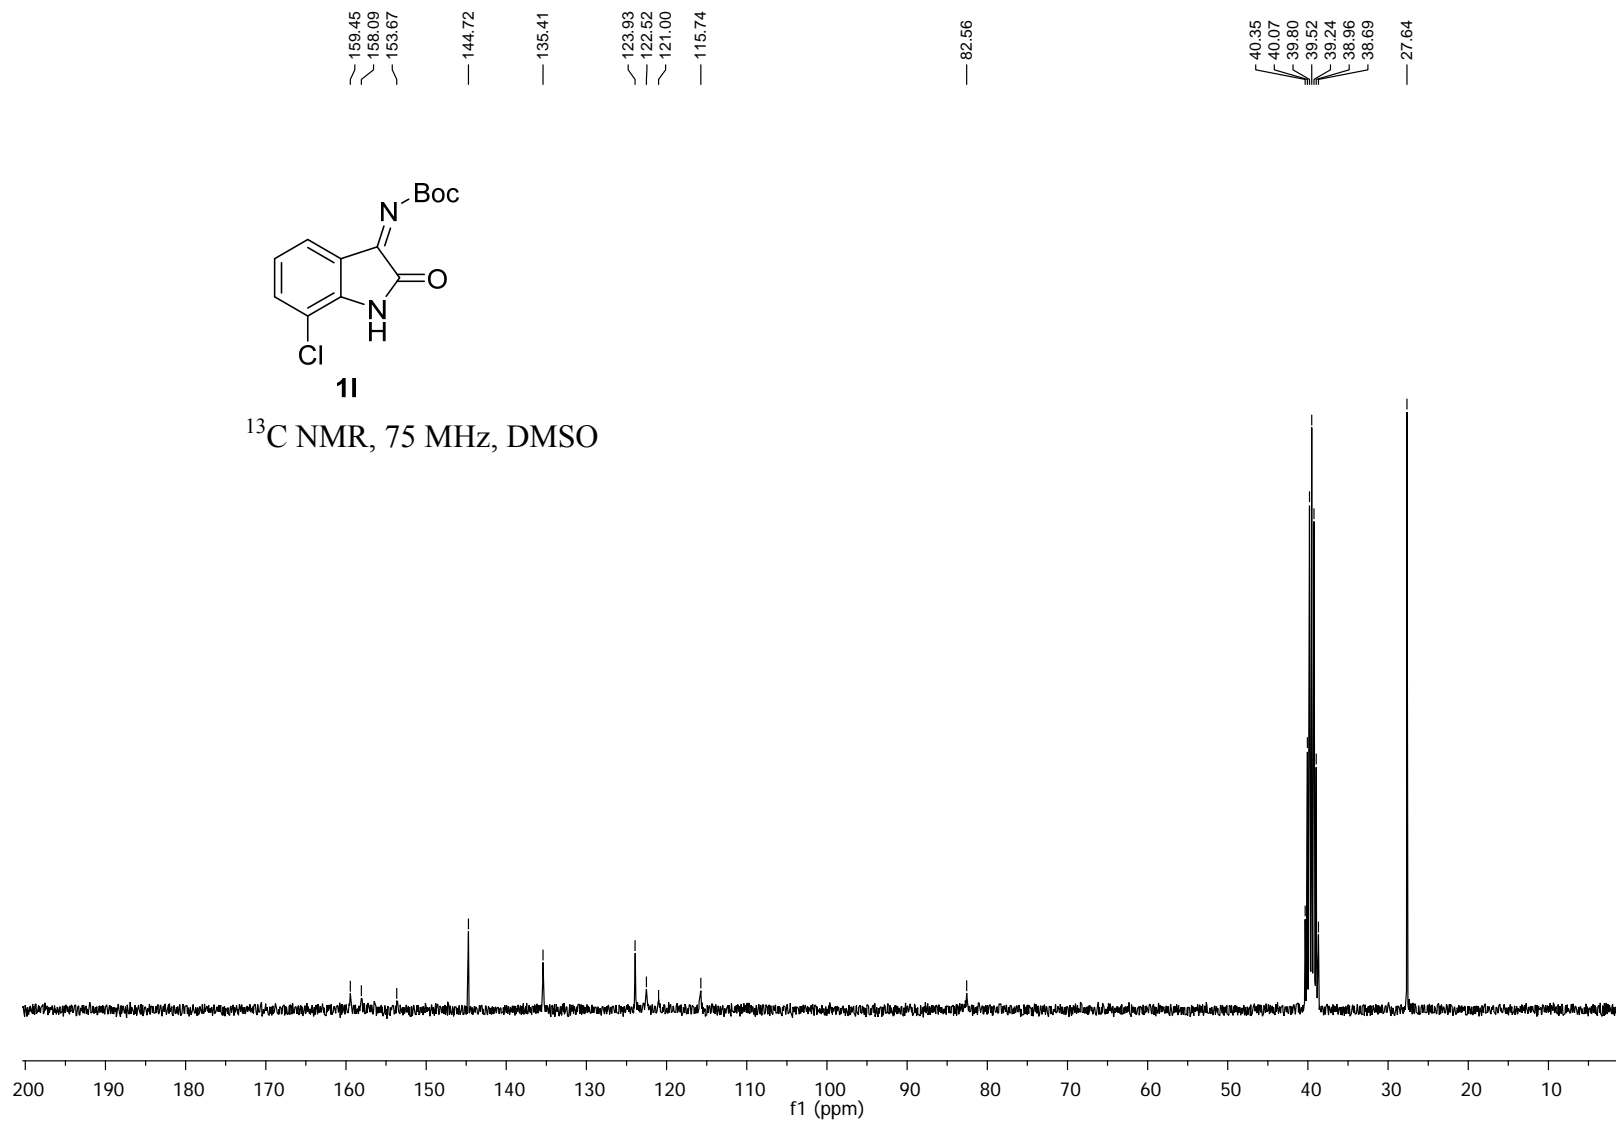

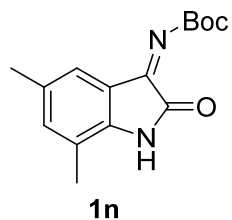

<sup>1</sup>H NMR, 300 MHz, CDCl<sub>3</sub>

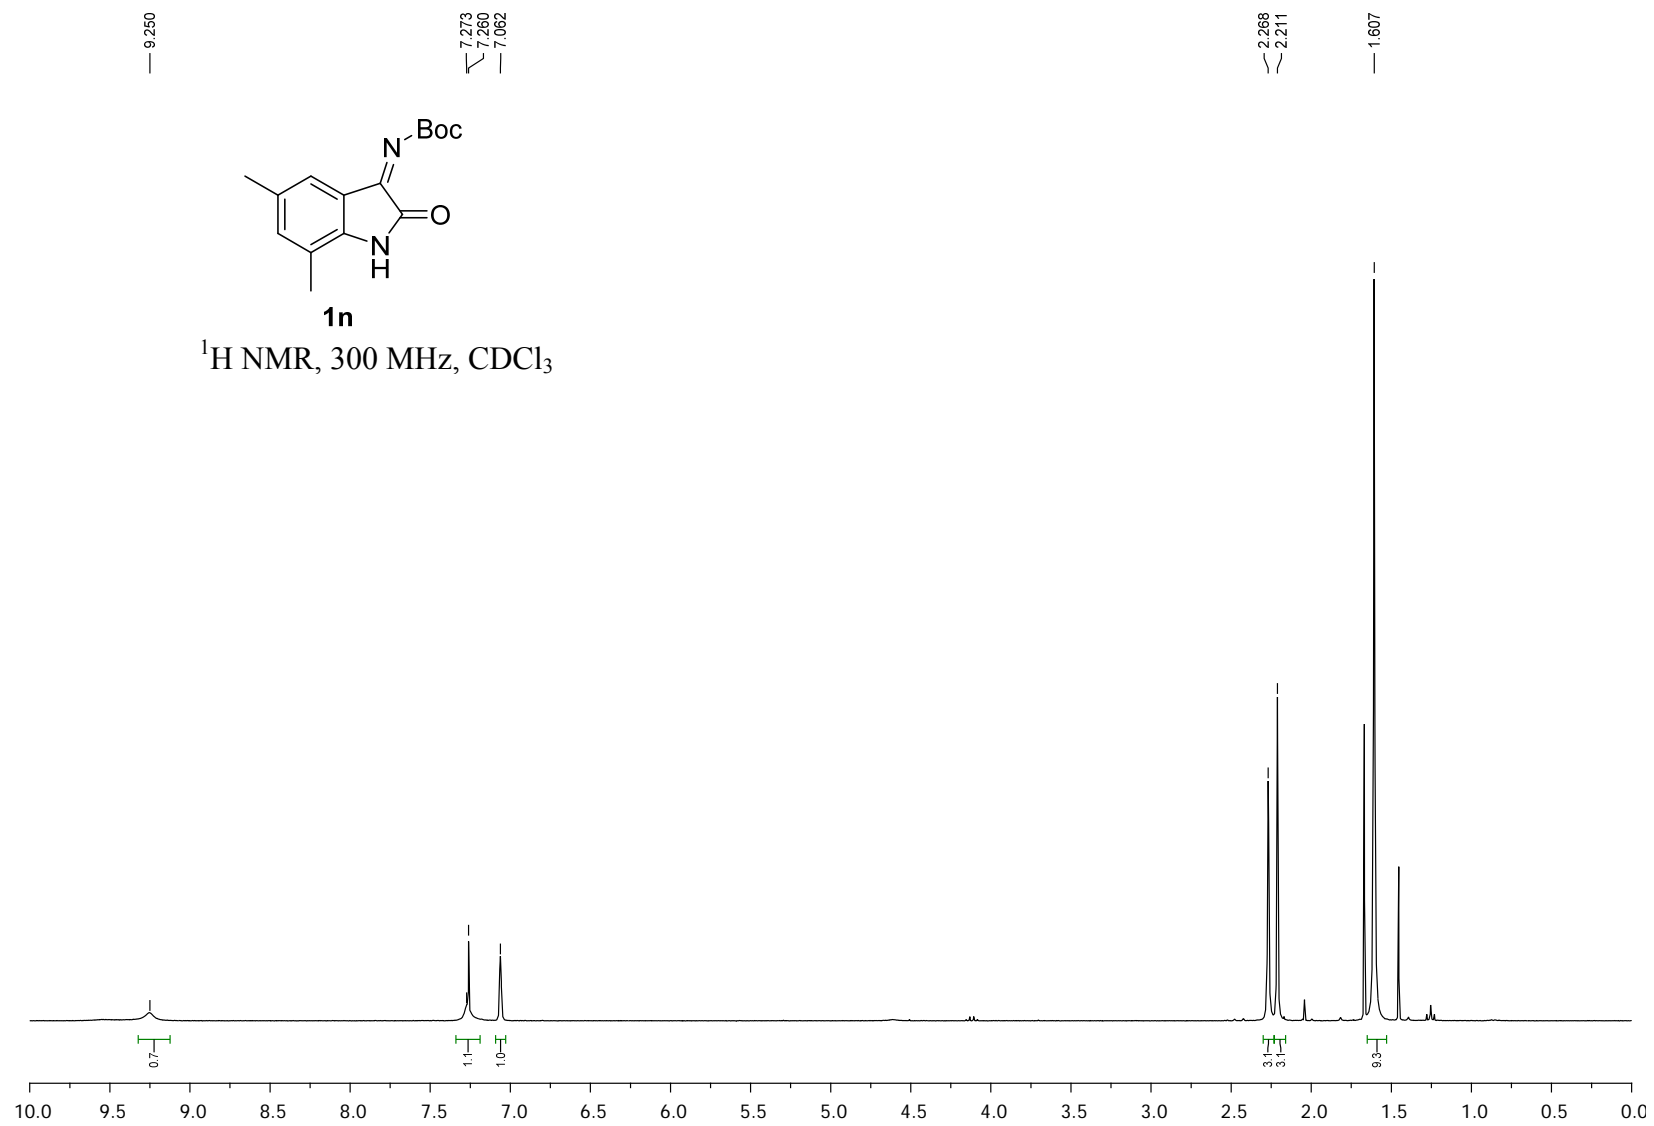

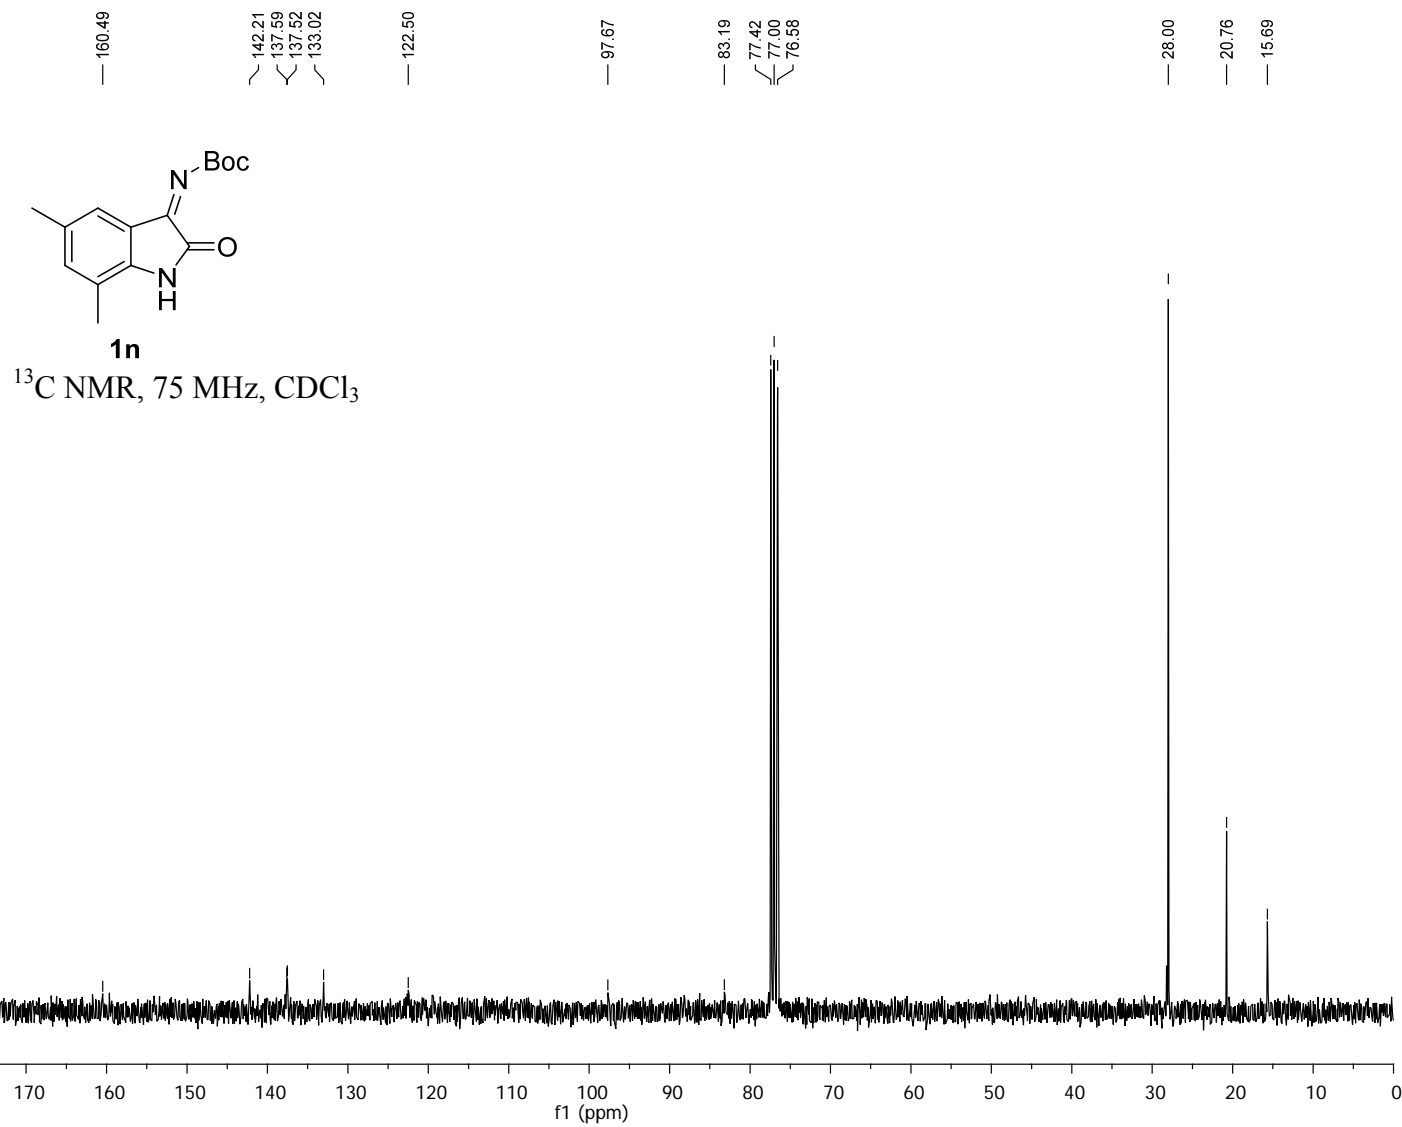

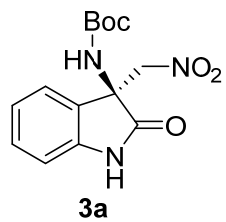

$^1\text{H}$  NMR, 300 MHz,  $\text{CDCl}_3$

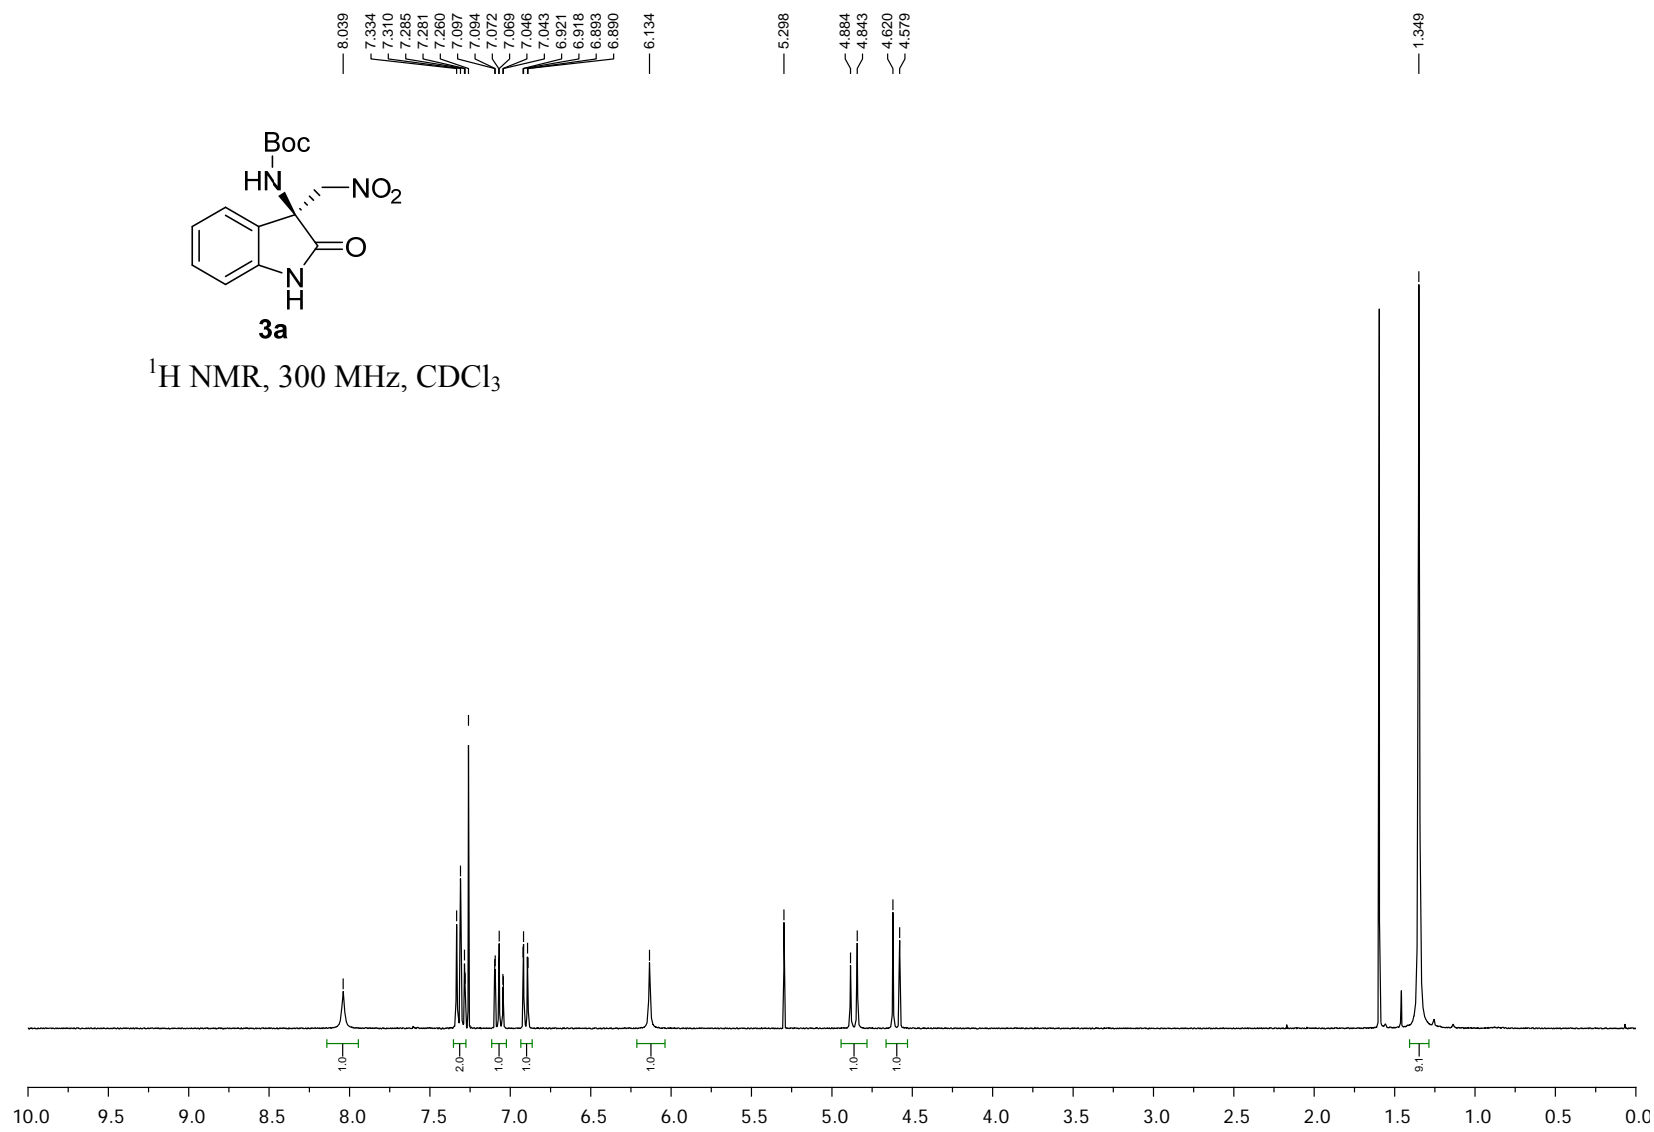



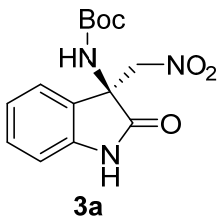

<sup>13</sup>C NMR, 75 MHz, CDCl<sub>3</sub>

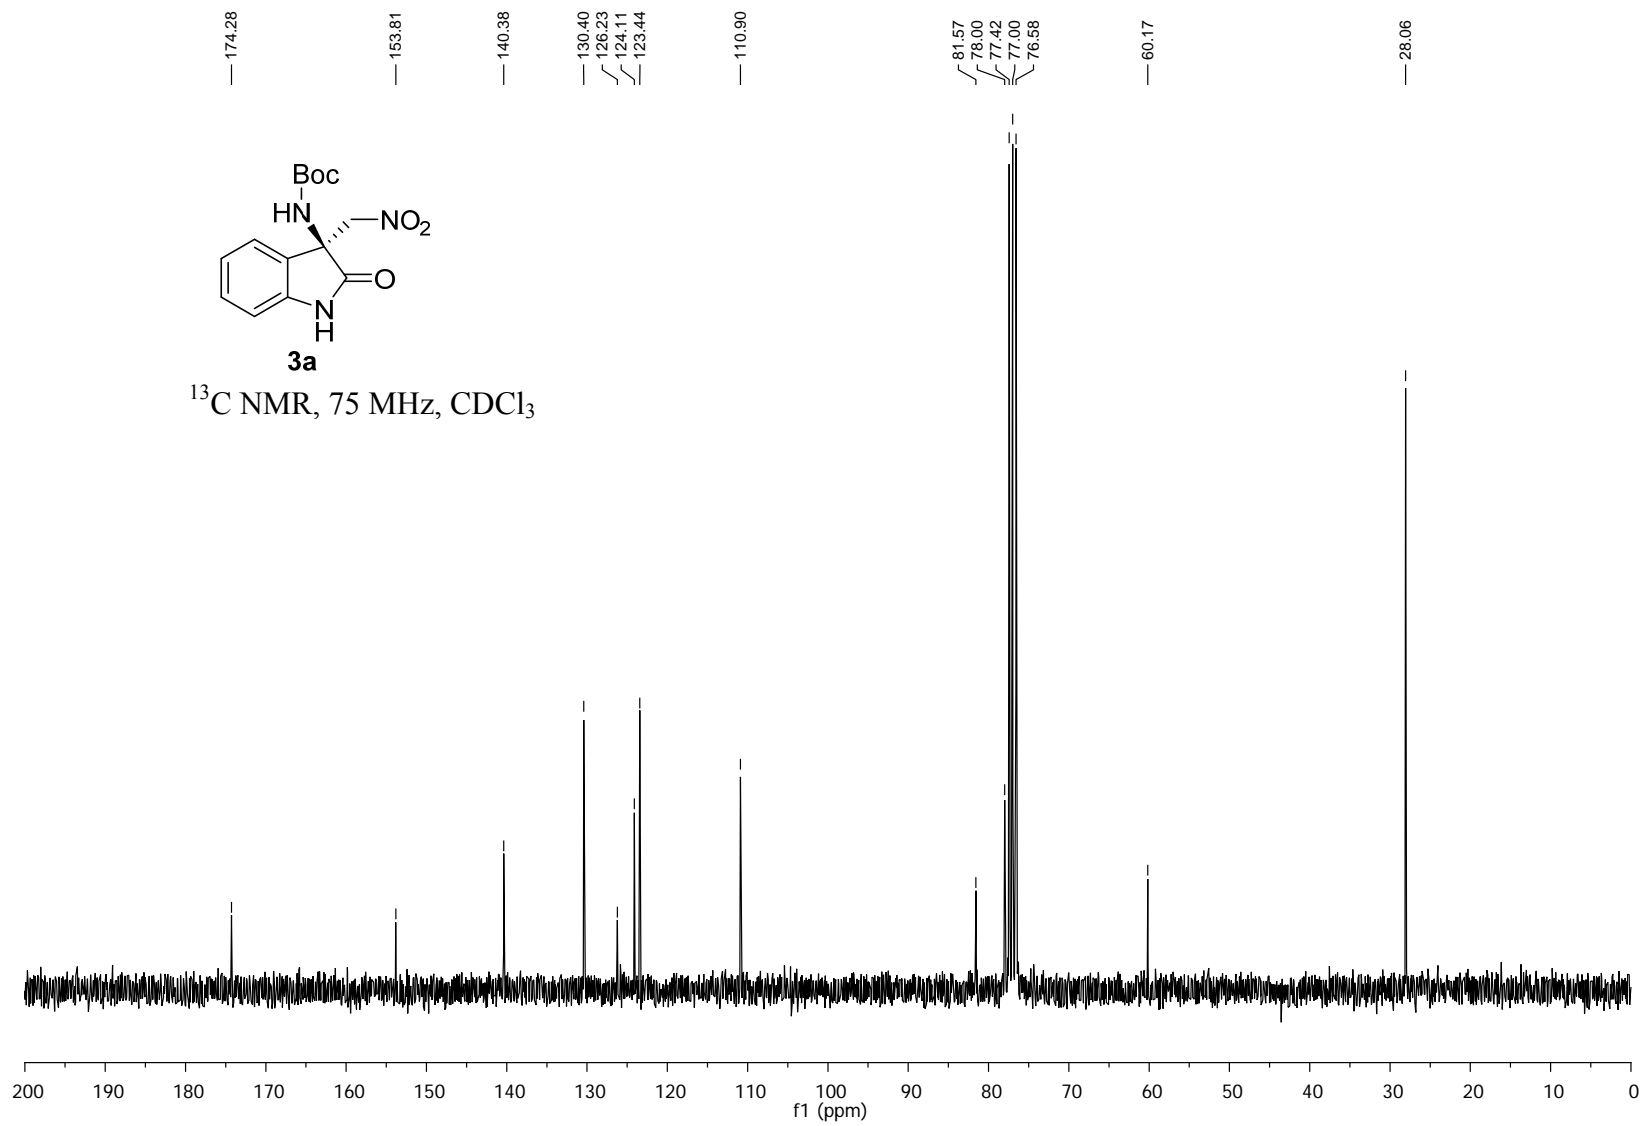

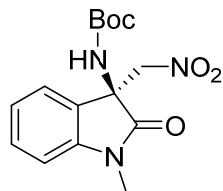

**3b**

$^1\text{H NMR}$ , 300 MHz,  $\text{CDCl}_3$

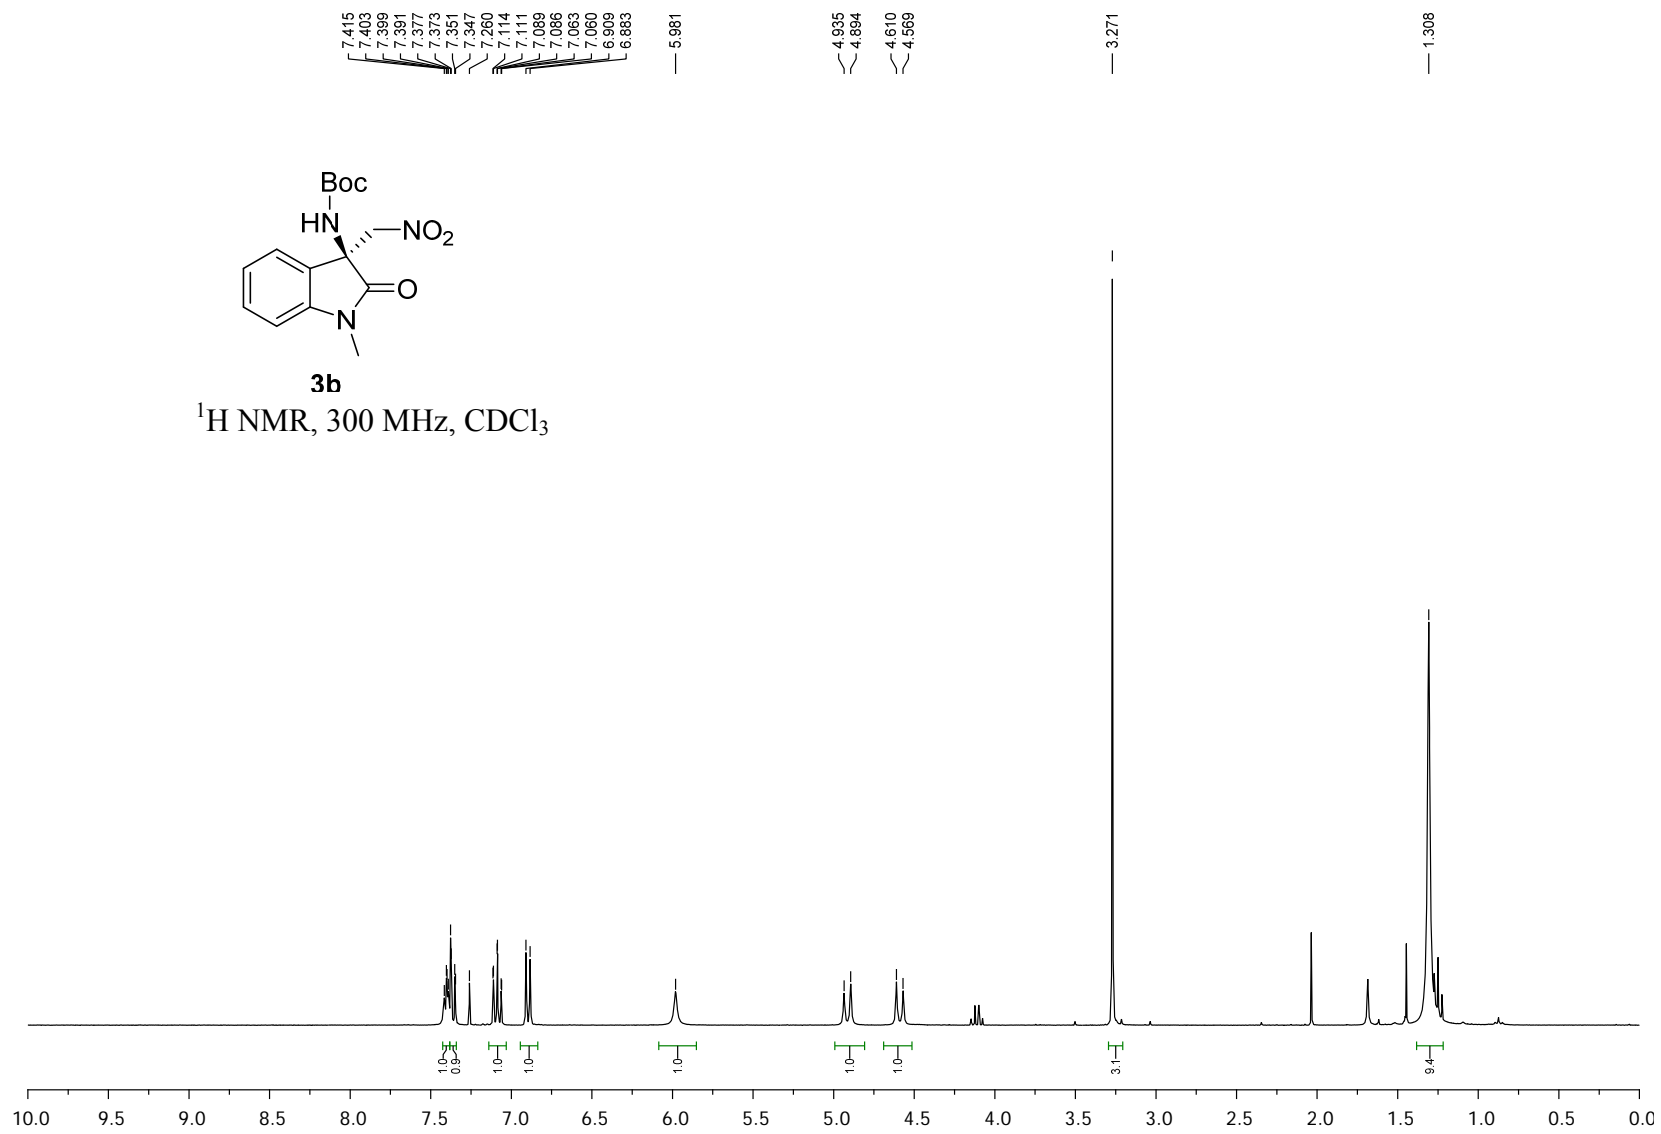

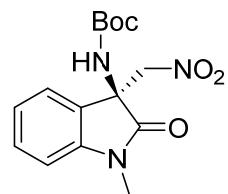

**3h**

$^{13}\text{C}$  NMR, 75 MHz,  $\text{CDCl}_3$

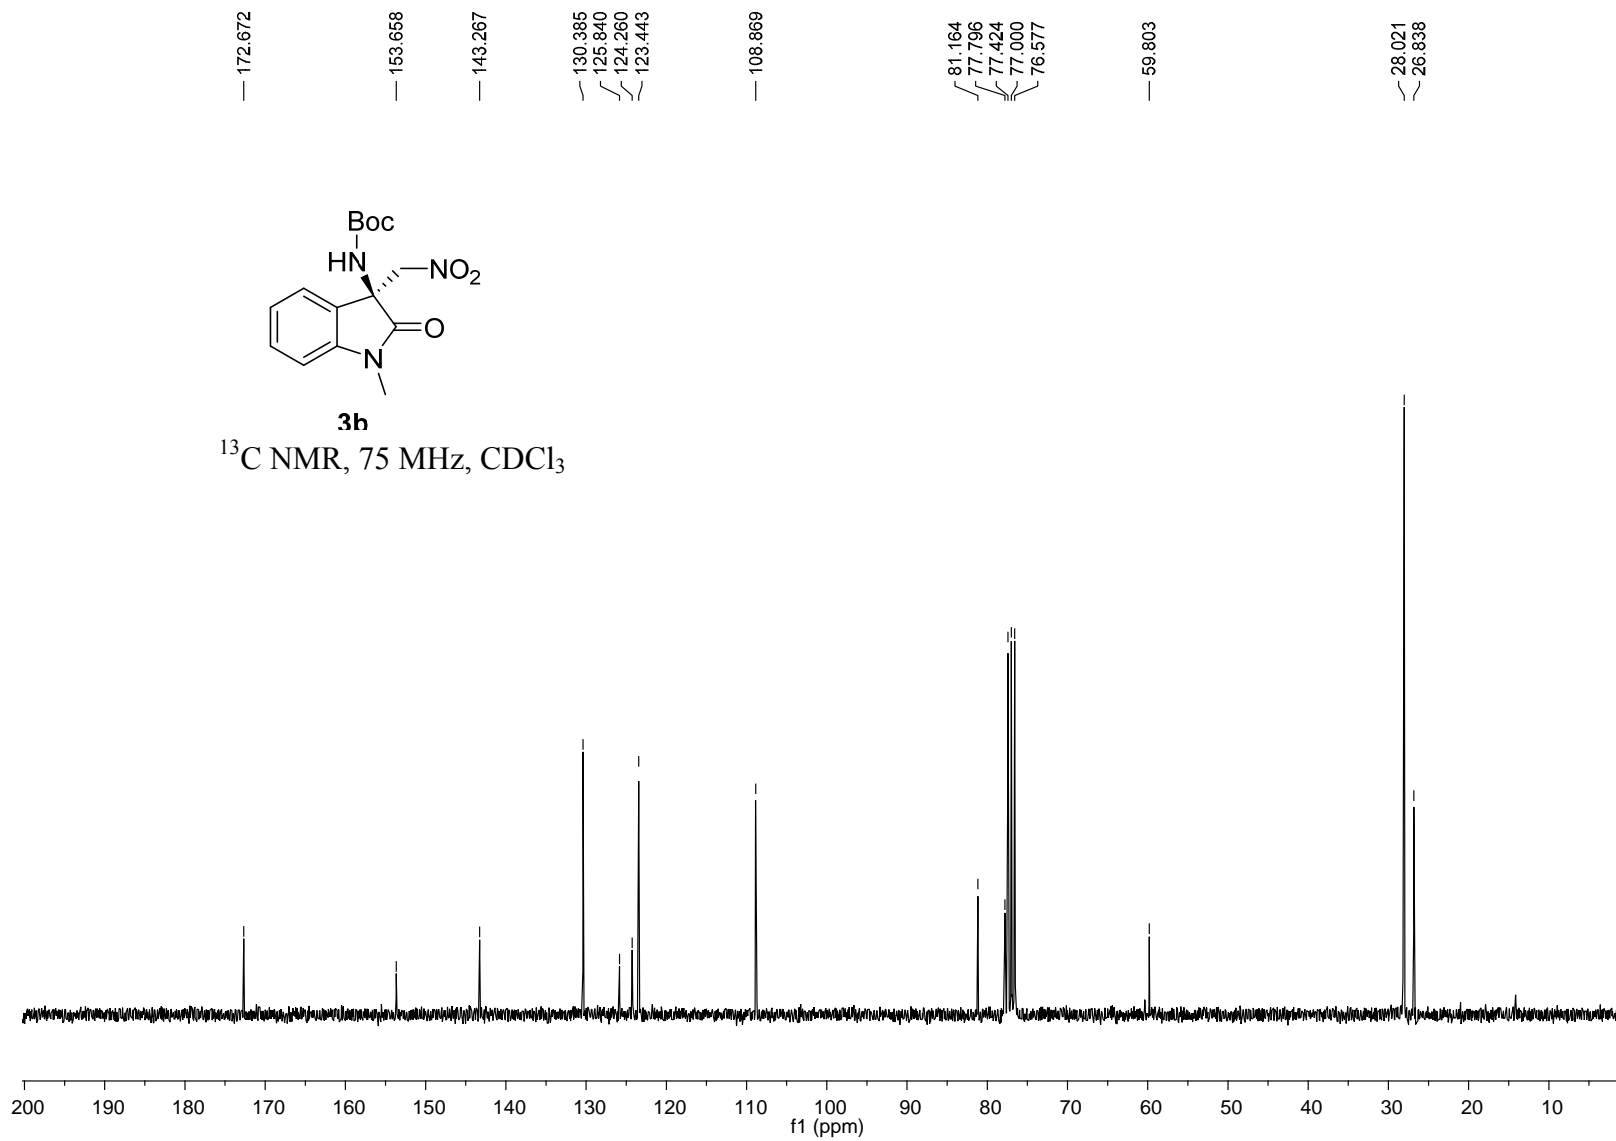

7.455  
7.431  
7.391  
7.383  
7.362  
7.356  
7.341  
7.277  
7.273  
7.260  
7.251  
7.247  
7.225  
7.221  
7.078  
7.075  
7.053  
7.050  
7.028  
7.025  
6.783  
6.756

— 5.978

5.081  
5.029  
5.004  
4.963  
4.933  
4.897  
4.844  
4.885  
4.844

— 1.357

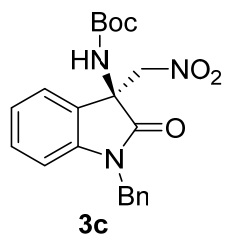

$^1\text{H NMR}$ , 300 MHz,  $\text{CDCl}_3$

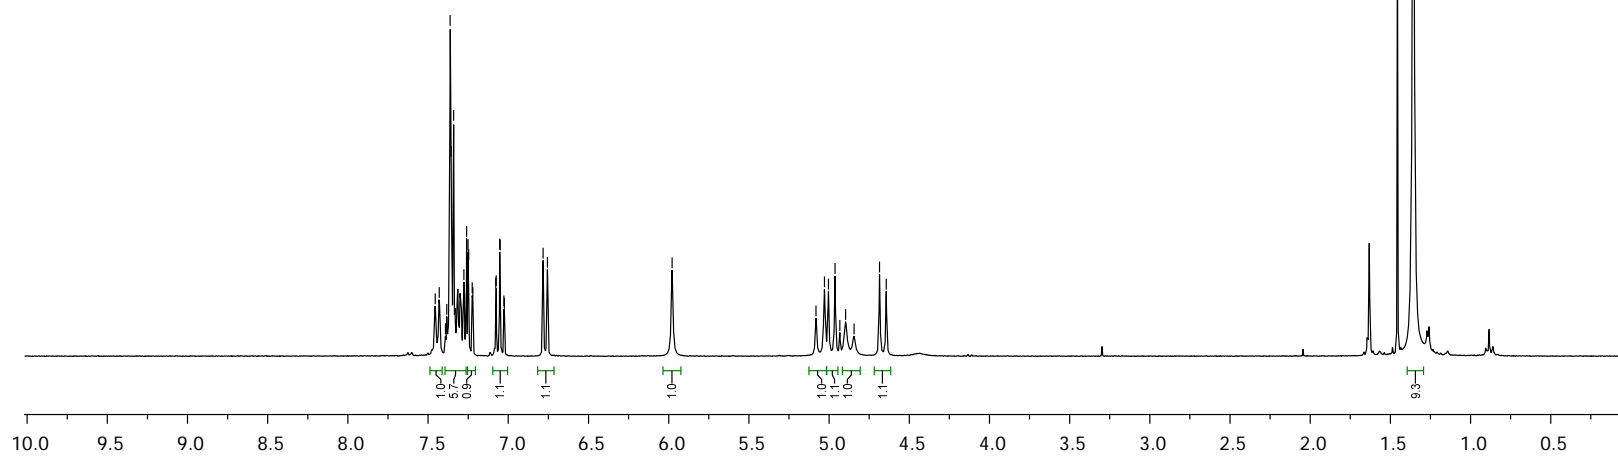

— 172.90  
— 153.75  
— 142.46  
— 135.03  
— 130.28  
— 128.88  
— 127.85  
— 127.34  
— 125.82  
— 124.46  
— 123.44  
— 109.94  
— 81.26  
— 77.76  
— 77.42  
— 77.00  
— 76.58  
— 59.88  
— 44.52  
— 28.09

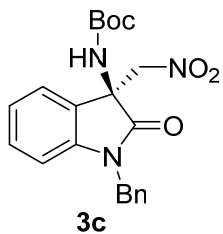

<sup>13</sup>C NMR, 75 MHz, CDCl<sub>3</sub>

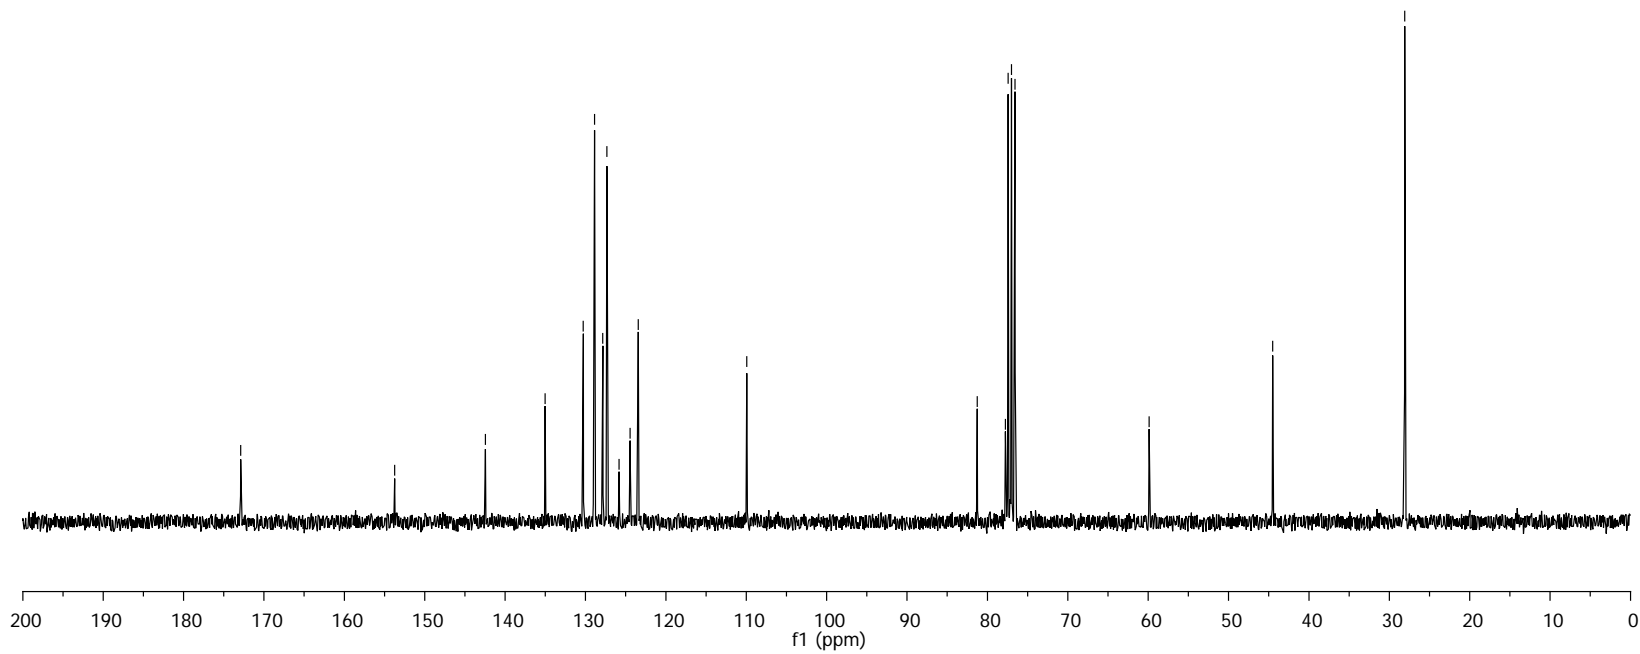

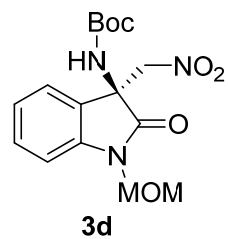

$^1\text{H NMR}$ , 300 MHz,  $\text{CDCl}_3$

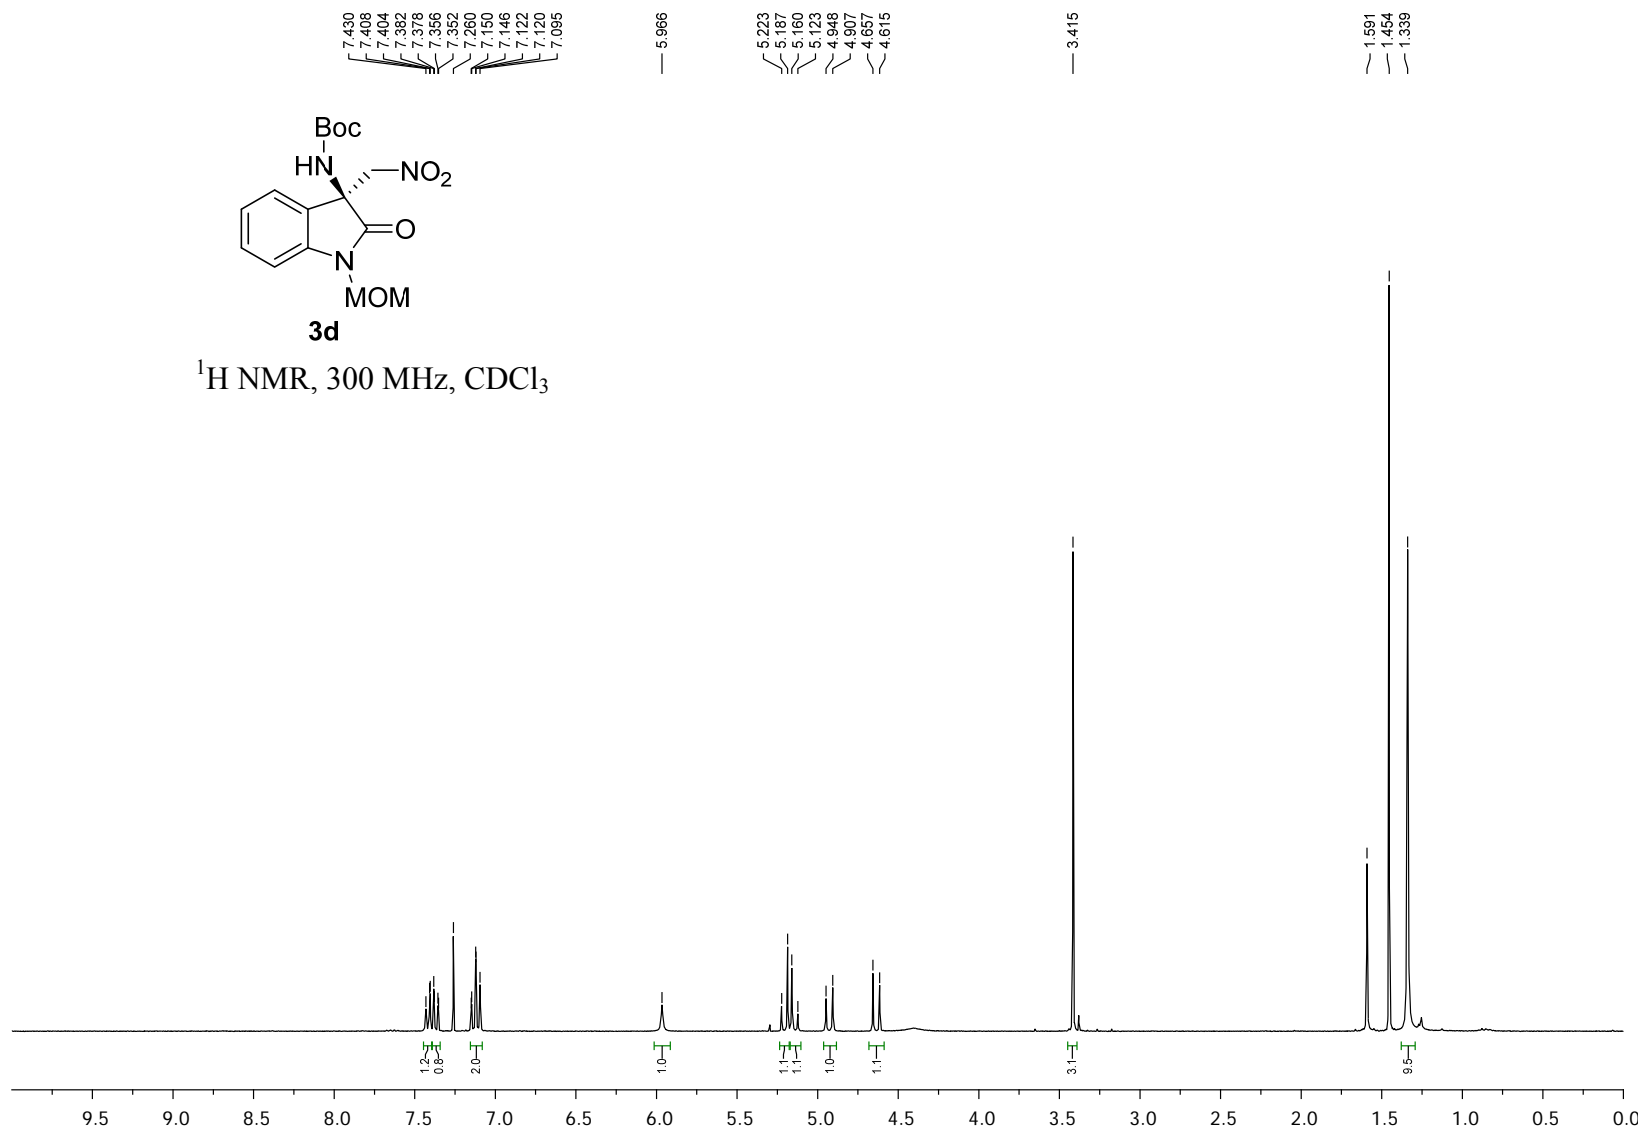

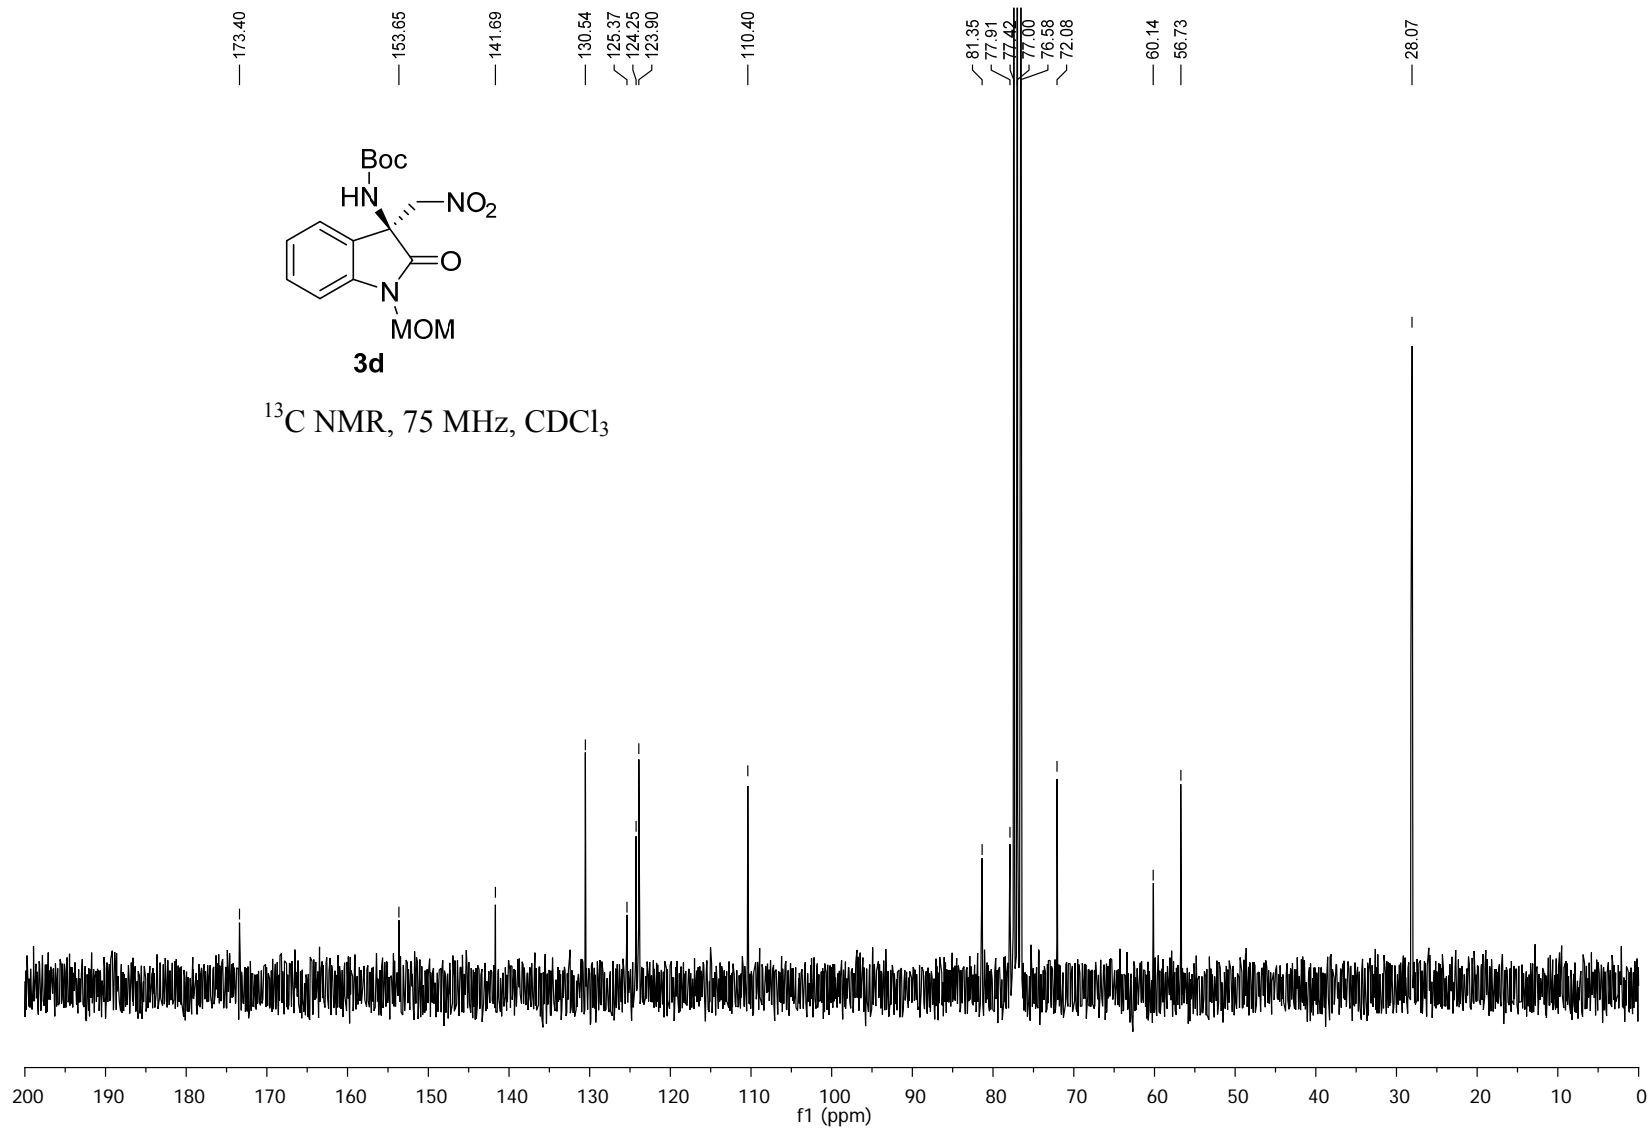

7.911  
7.909  
7.906  
7.883  
7.881  
7.878  
7.428  
7.407  
7.405  
7.403  
7.400  
7.380  
7.375  
7.309  
7.280  
7.211  
7.208  
7.186  
6.192

4.881  
4.839  
4.846  
4.804

1.642

1.270

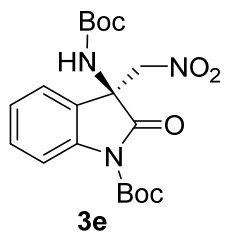

<sup>1</sup>H NMR, 300 MHz, CDCl<sub>3</sub>

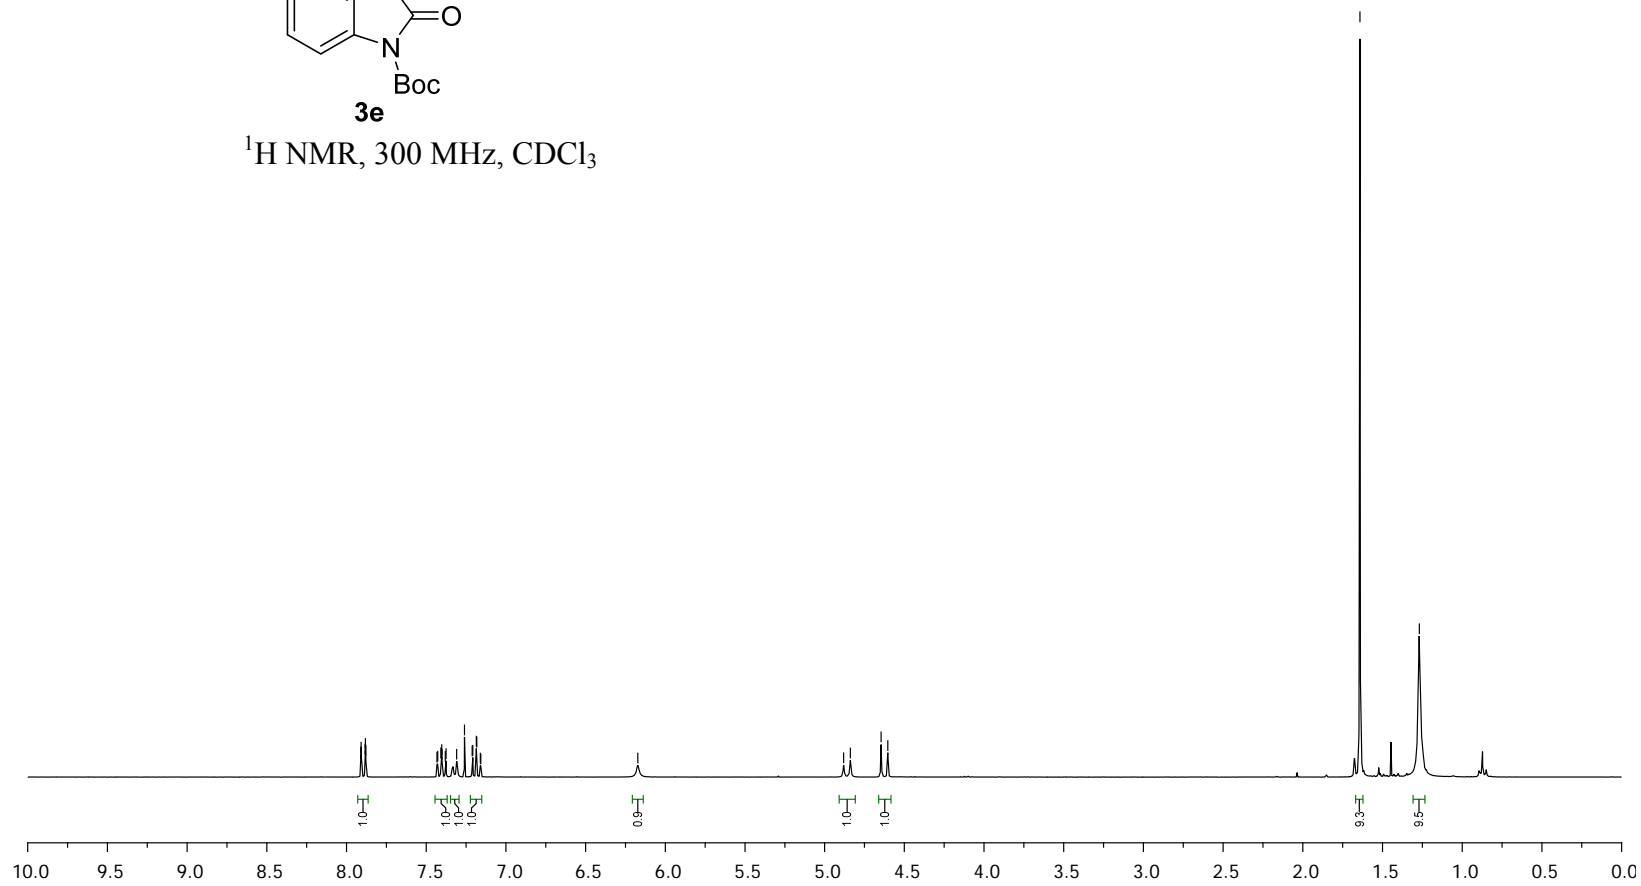



171.12  
153.36  
148.54  
139.47  
130.60  
125.14  
124.91  
123.36  
115.59  
85.22  
81.79  
78.13  
77.42  
77.00  
76.58  
60.11  
31.54  
28.01  
27.87  
22.61  
14.08

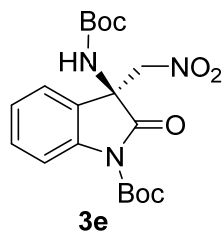

$^{13}\text{C}$  NMR, 75 MHz,  $\text{CDCl}_3$

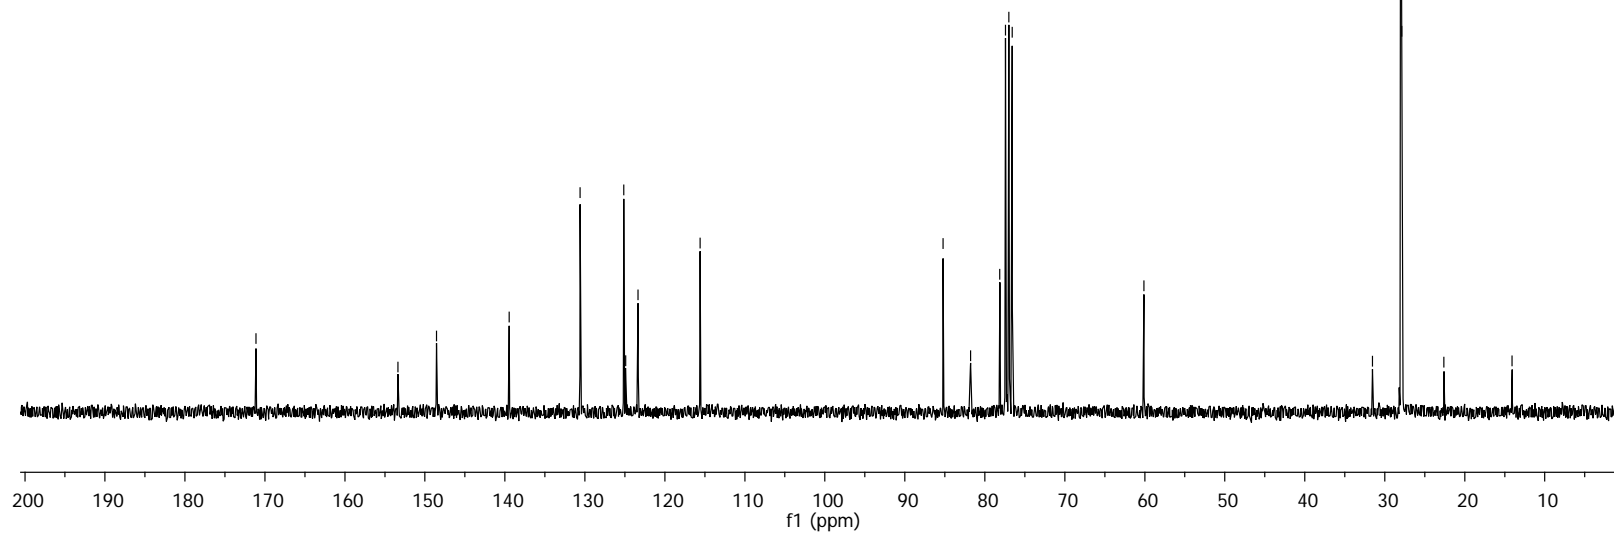

8.249  
7.260  
7.118  
7.101  
7.089  
7.086  
7.093  
7.076  
7.073  
7.069  
7.067  
6.792  
6.765

6.143

4.870  
4.828  
4.615  
4.574

2.302

1.670

1.350

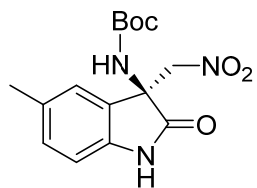

**3f**

<sup>1</sup>H NMR, 300 MHz, CDCl<sub>3</sub>

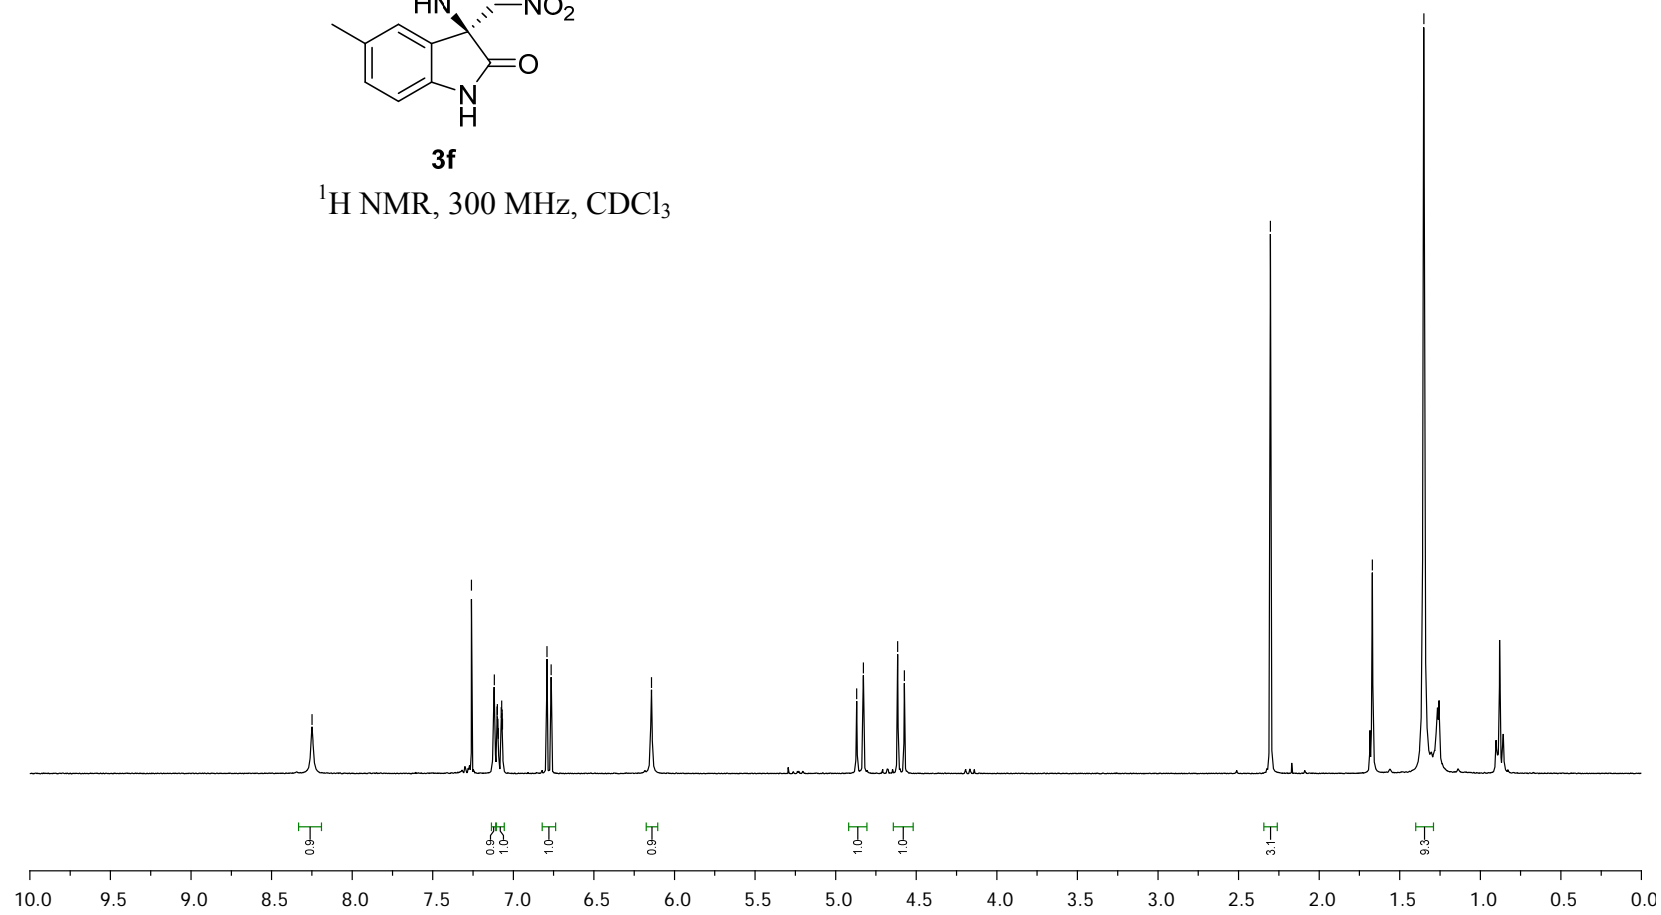

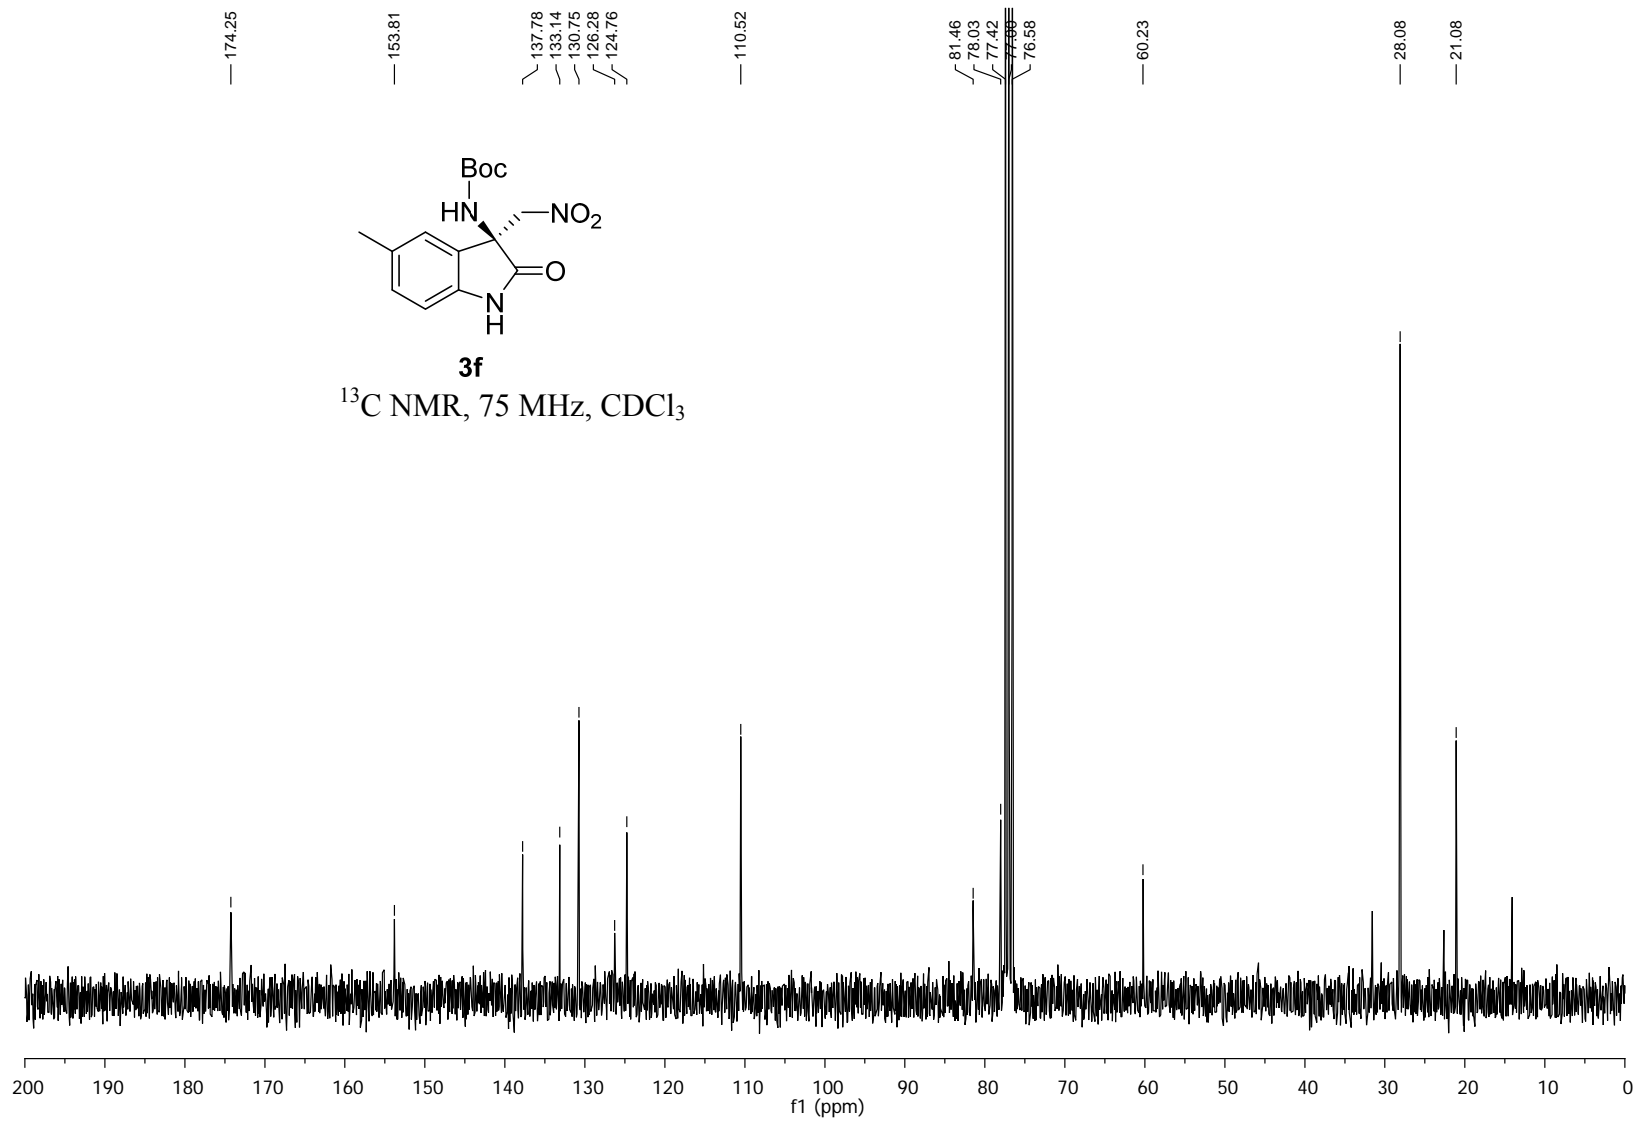

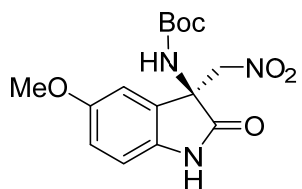

**3g**

$^1\text{H}$  NMR, 300 MHz,  $\text{CDCl}_3$

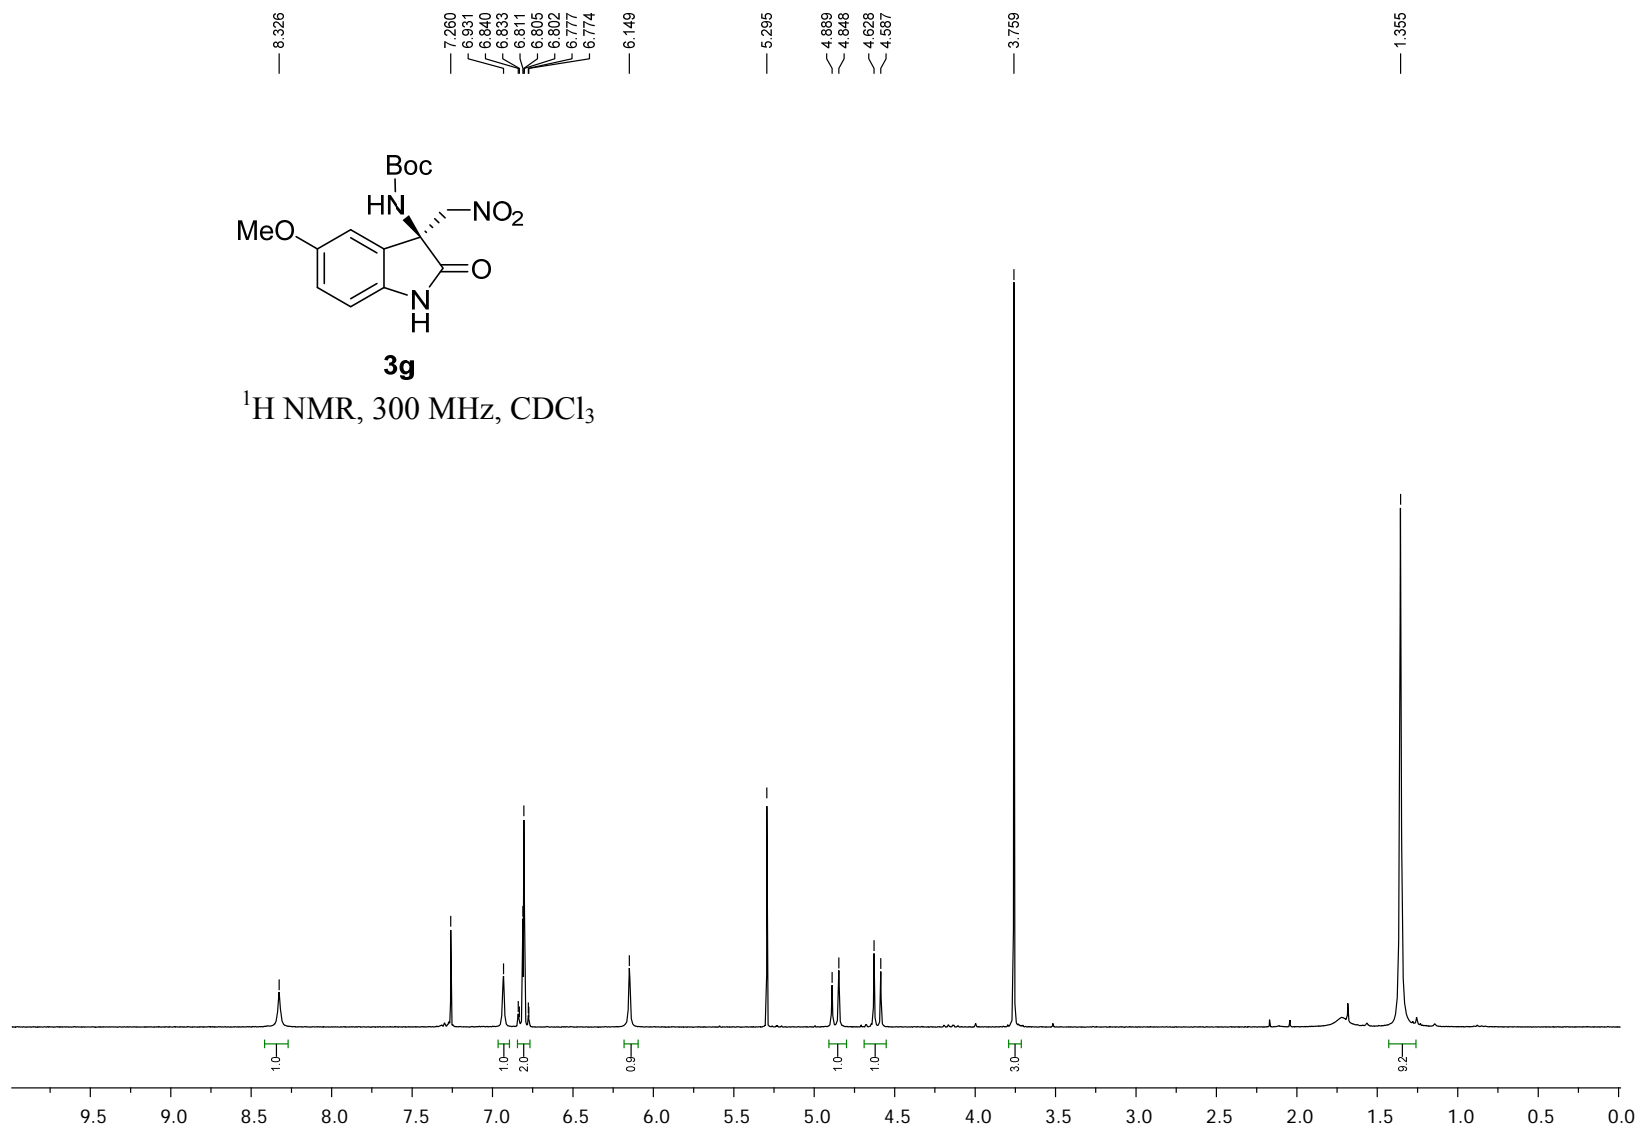

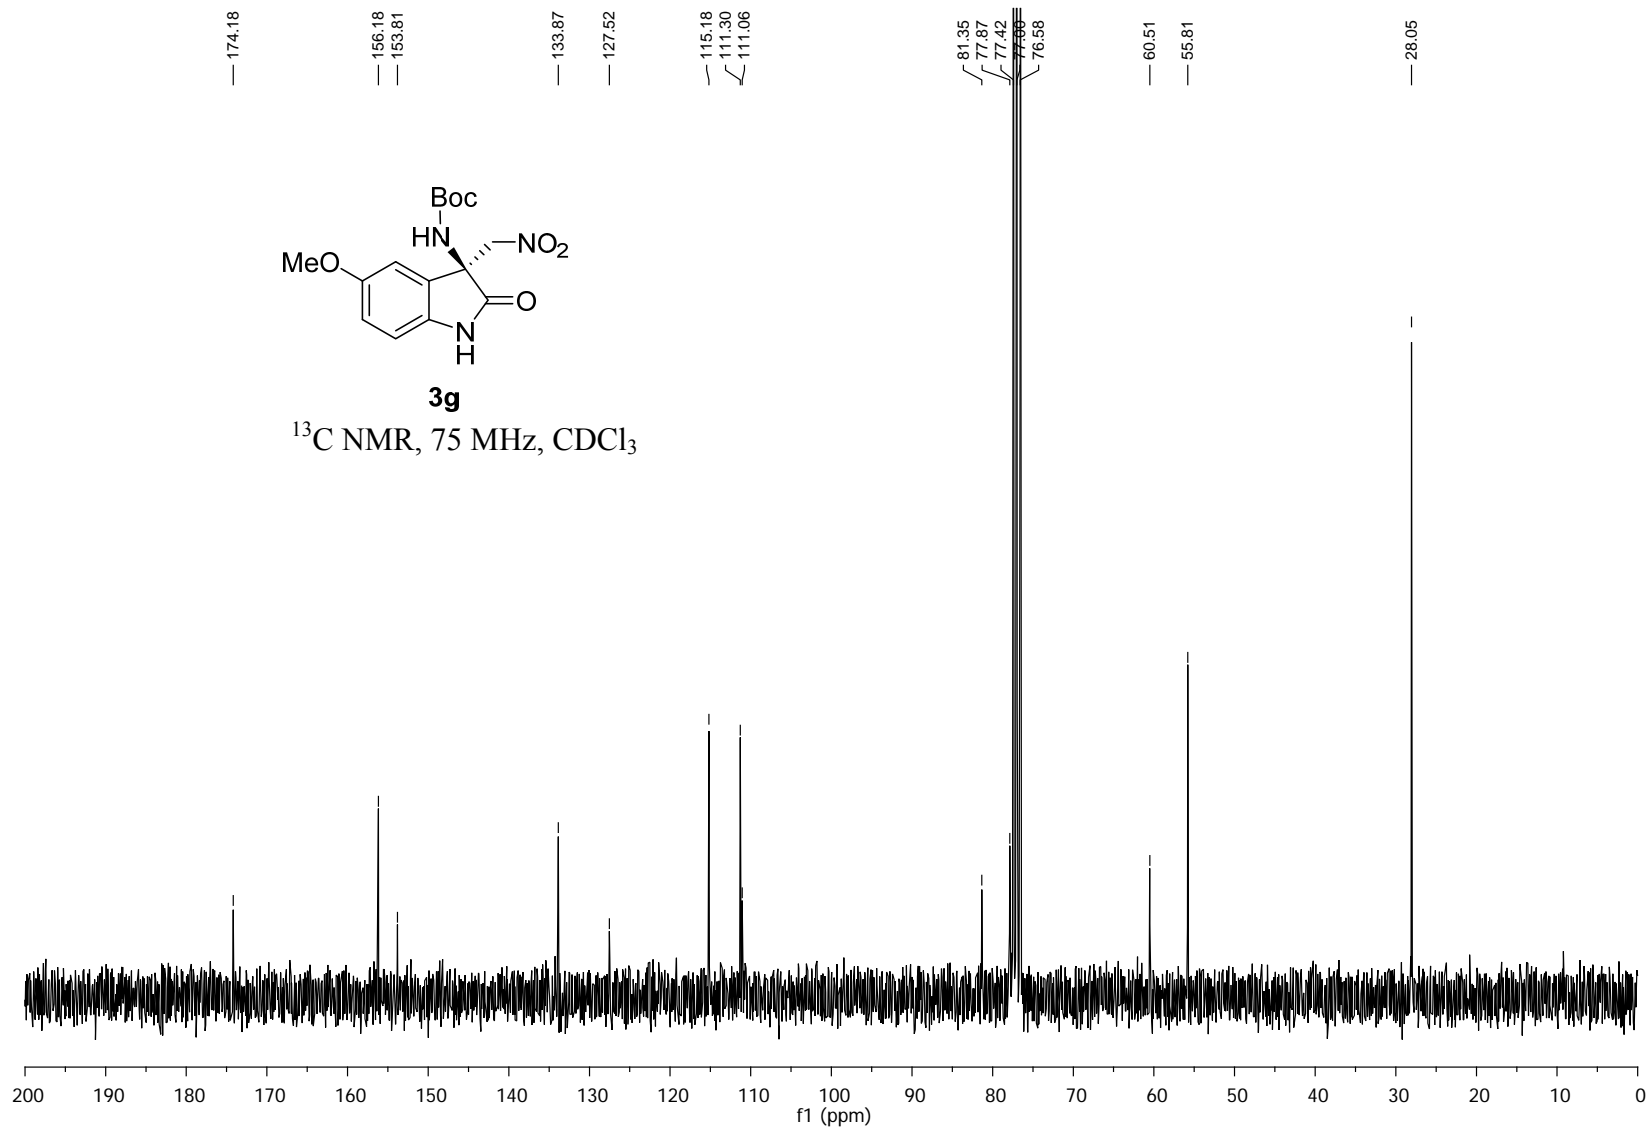

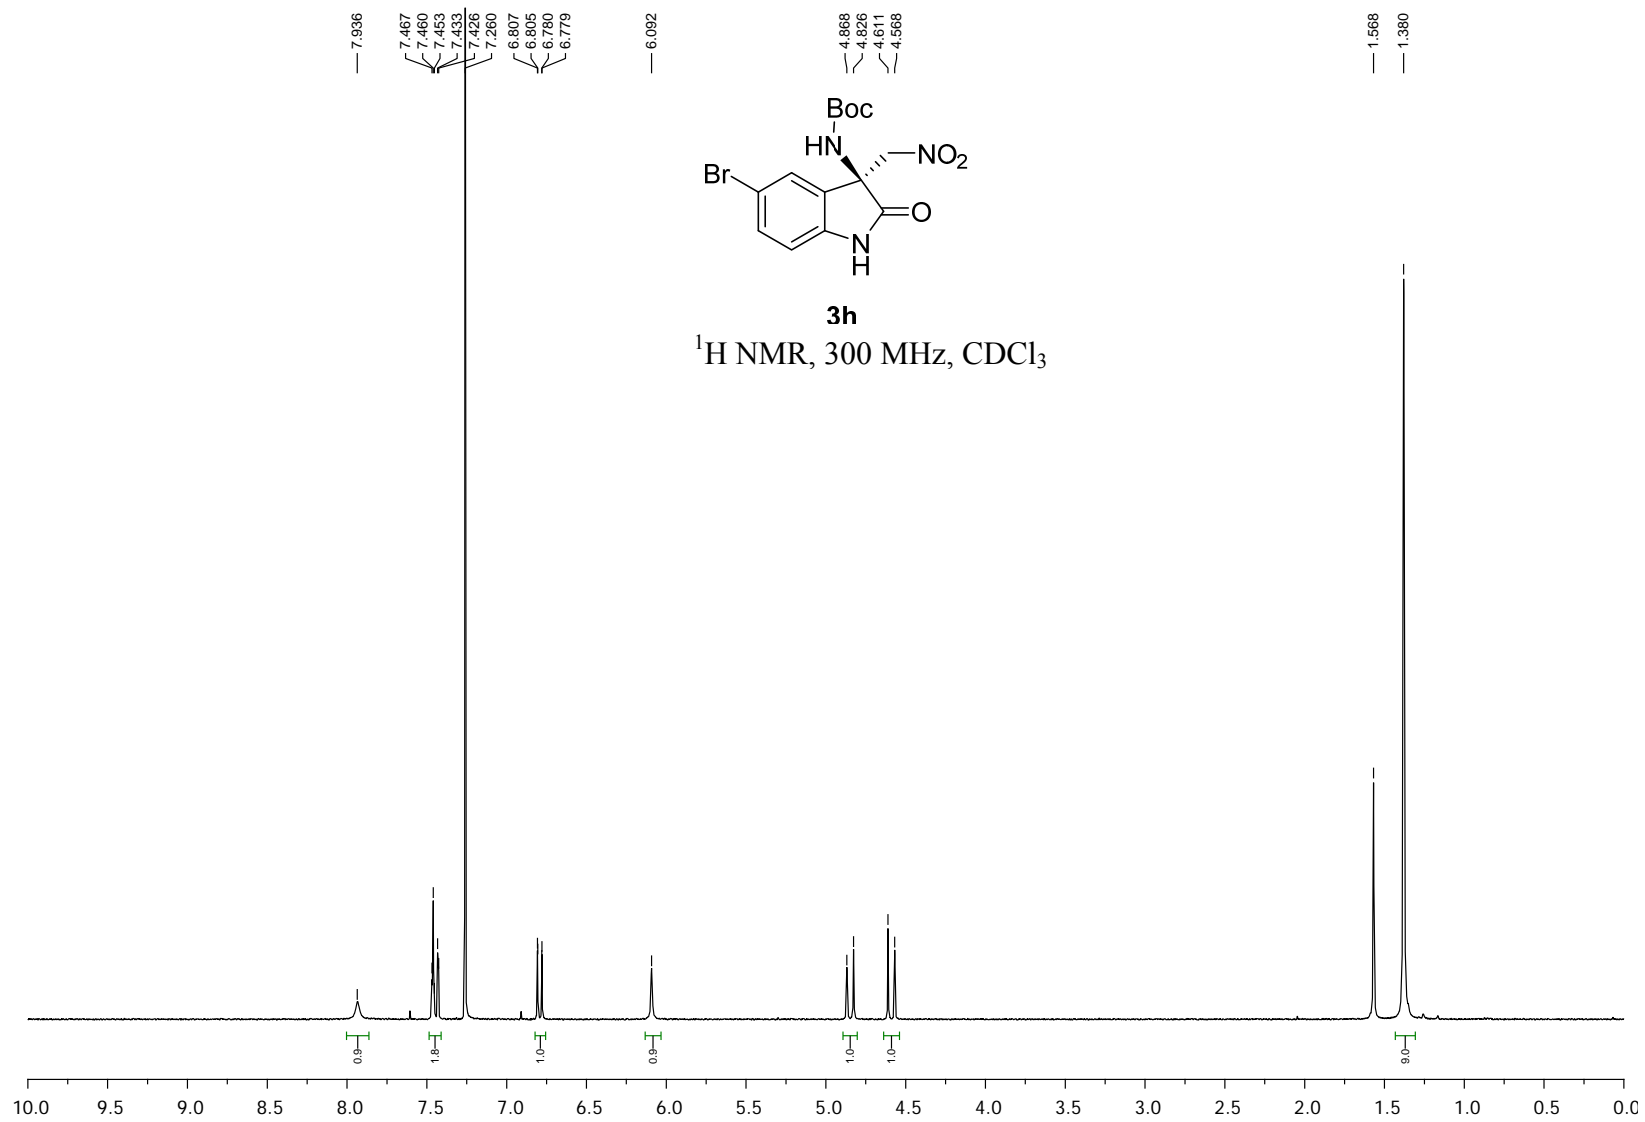

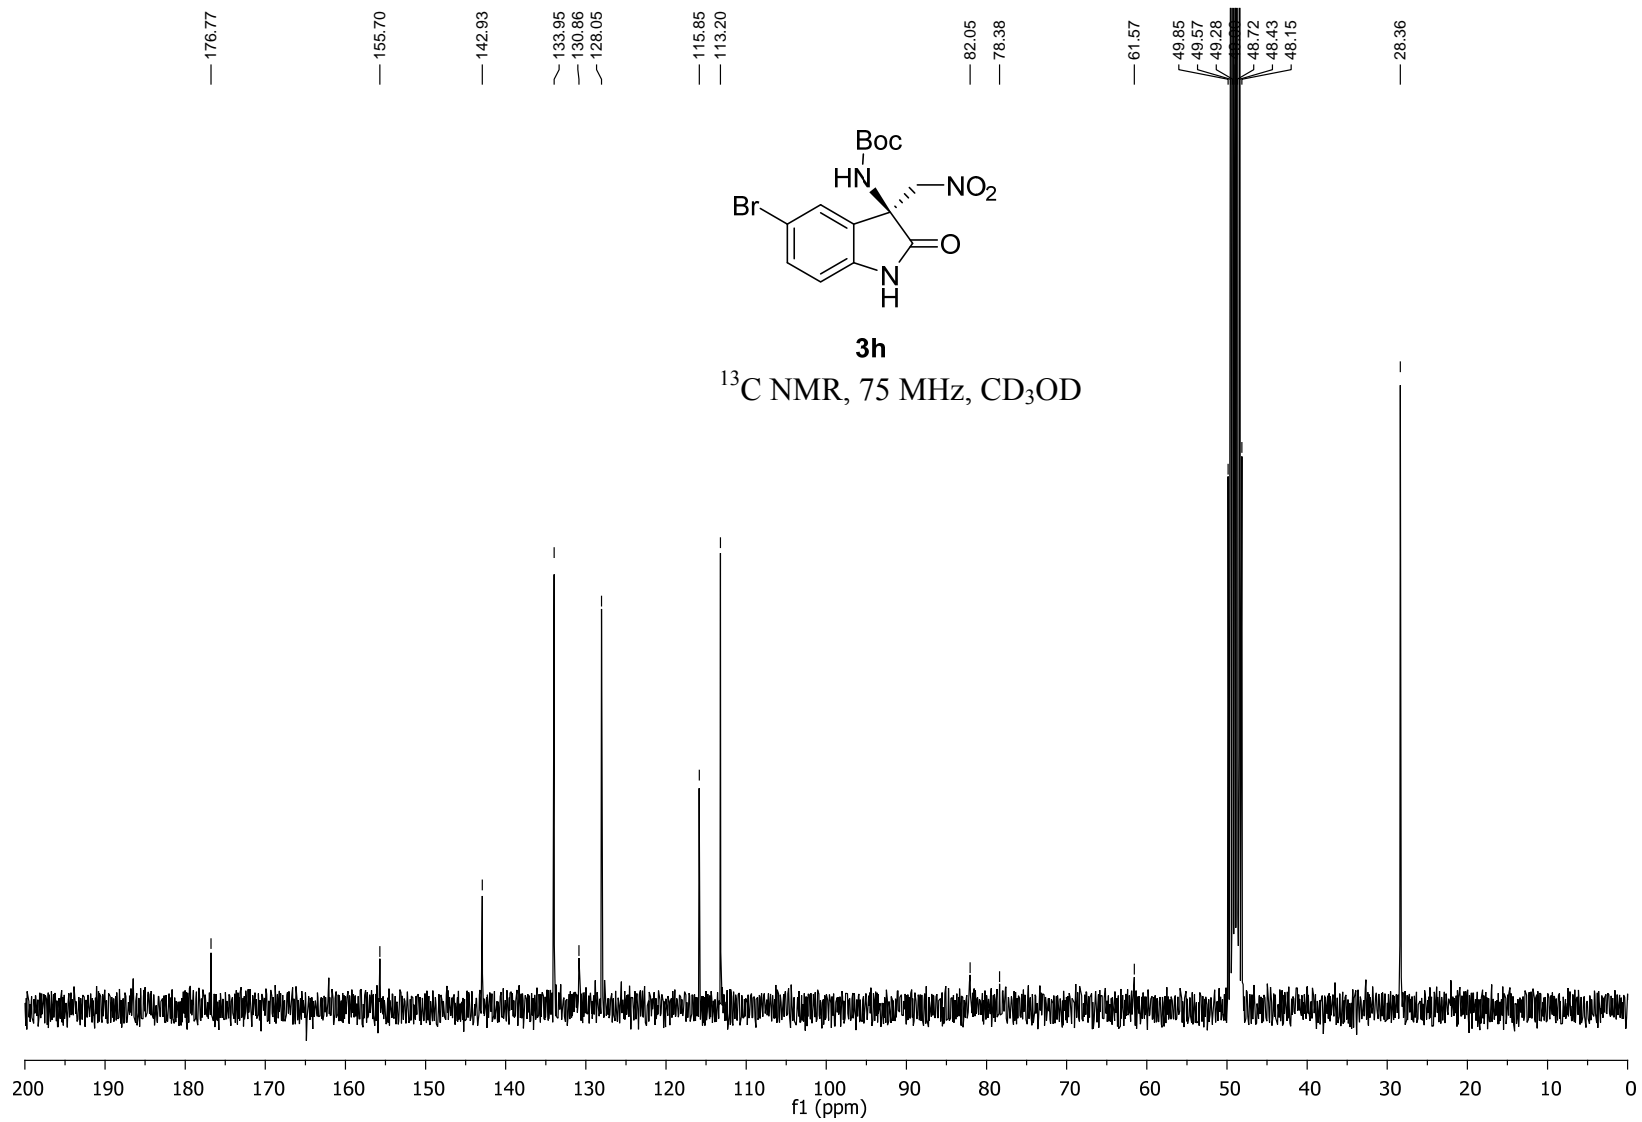

8.251  
7.327  
7.320  
7.301  
7.294  
7.273  
7.266  
7.260  
6.846  
6.819  
6.141

4.872  
4.829  
4.613  
4.571

1.617  
1.458  
1.376

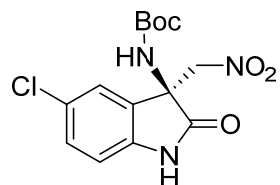

**3i**

$^1\text{H NMR}$ , 300 MHz,  $\text{CDCl}_3$

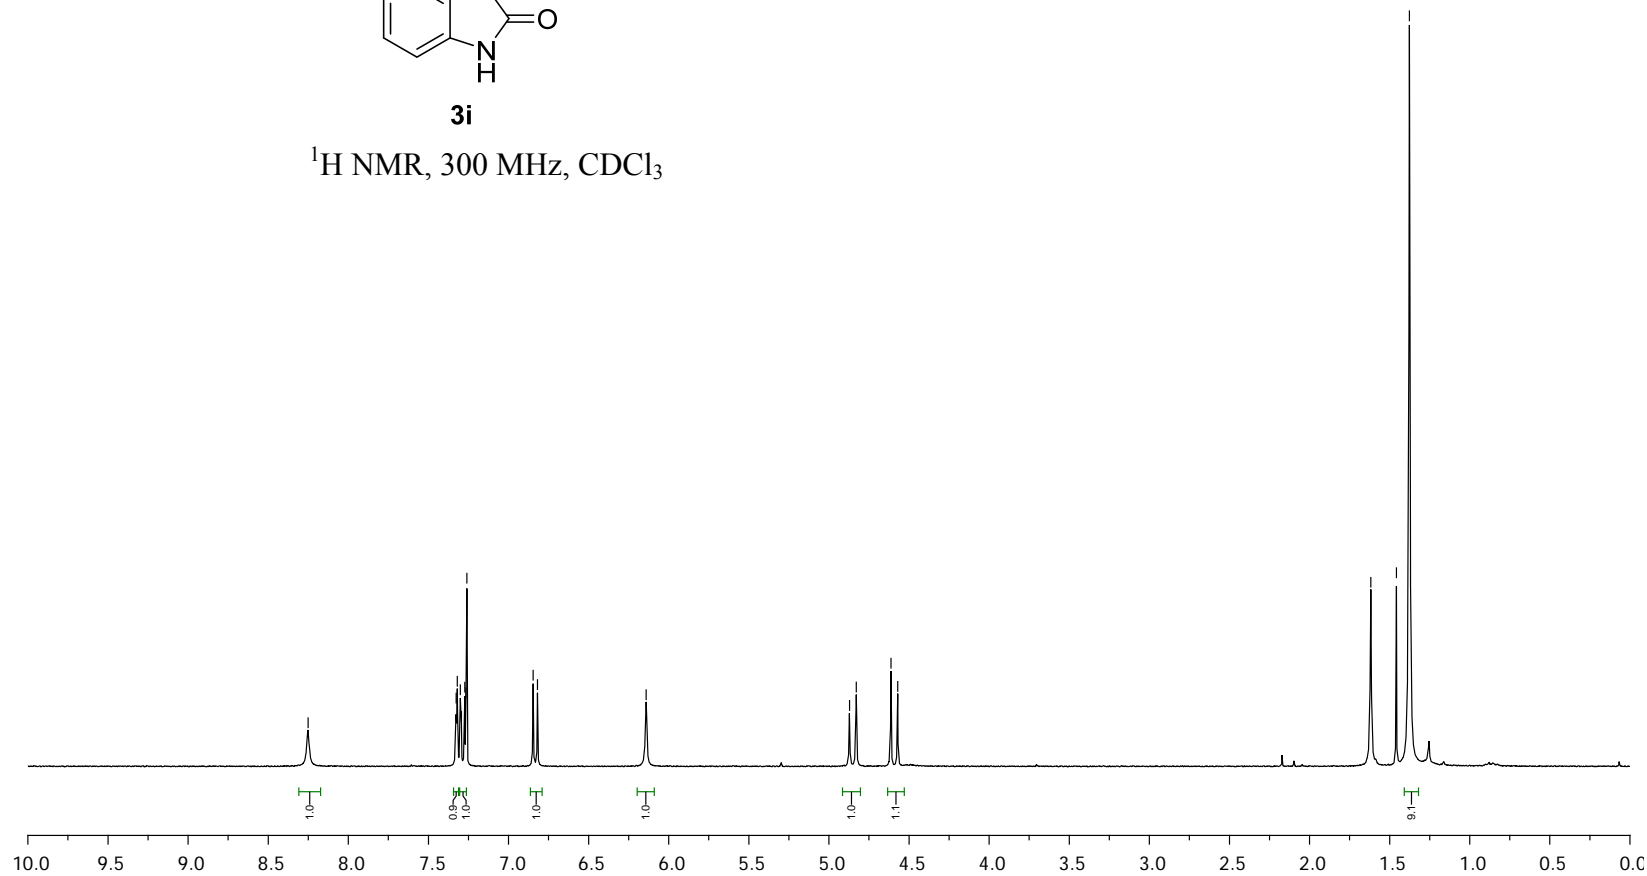



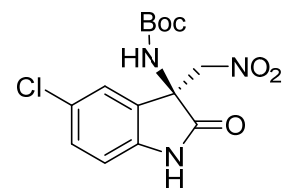

**3i**

$^{13}\text{C}$  NMR, 75 MHz,  $\text{CDCl}_3$

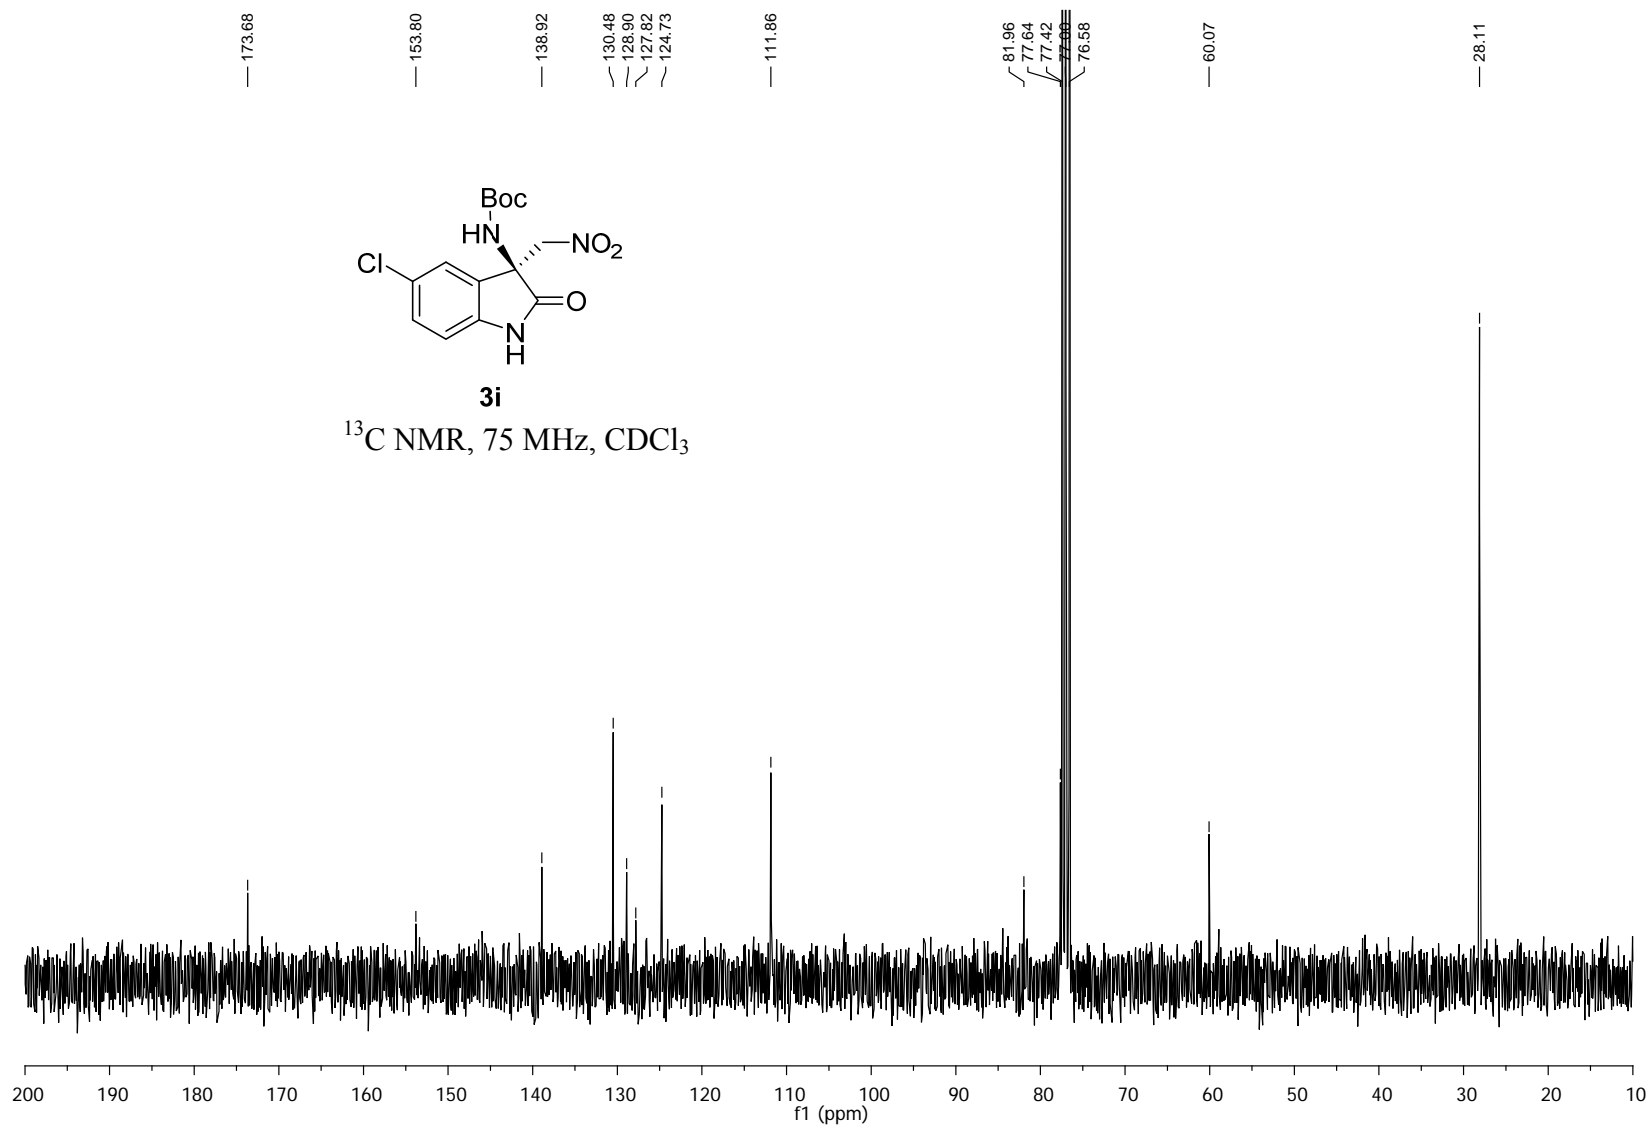

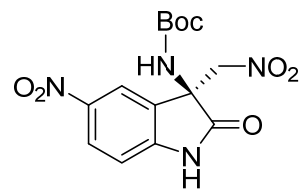

**3j**  
 $^1\text{H NMR}$ , 300 MHz,  $\text{CD}_3\text{OD}$

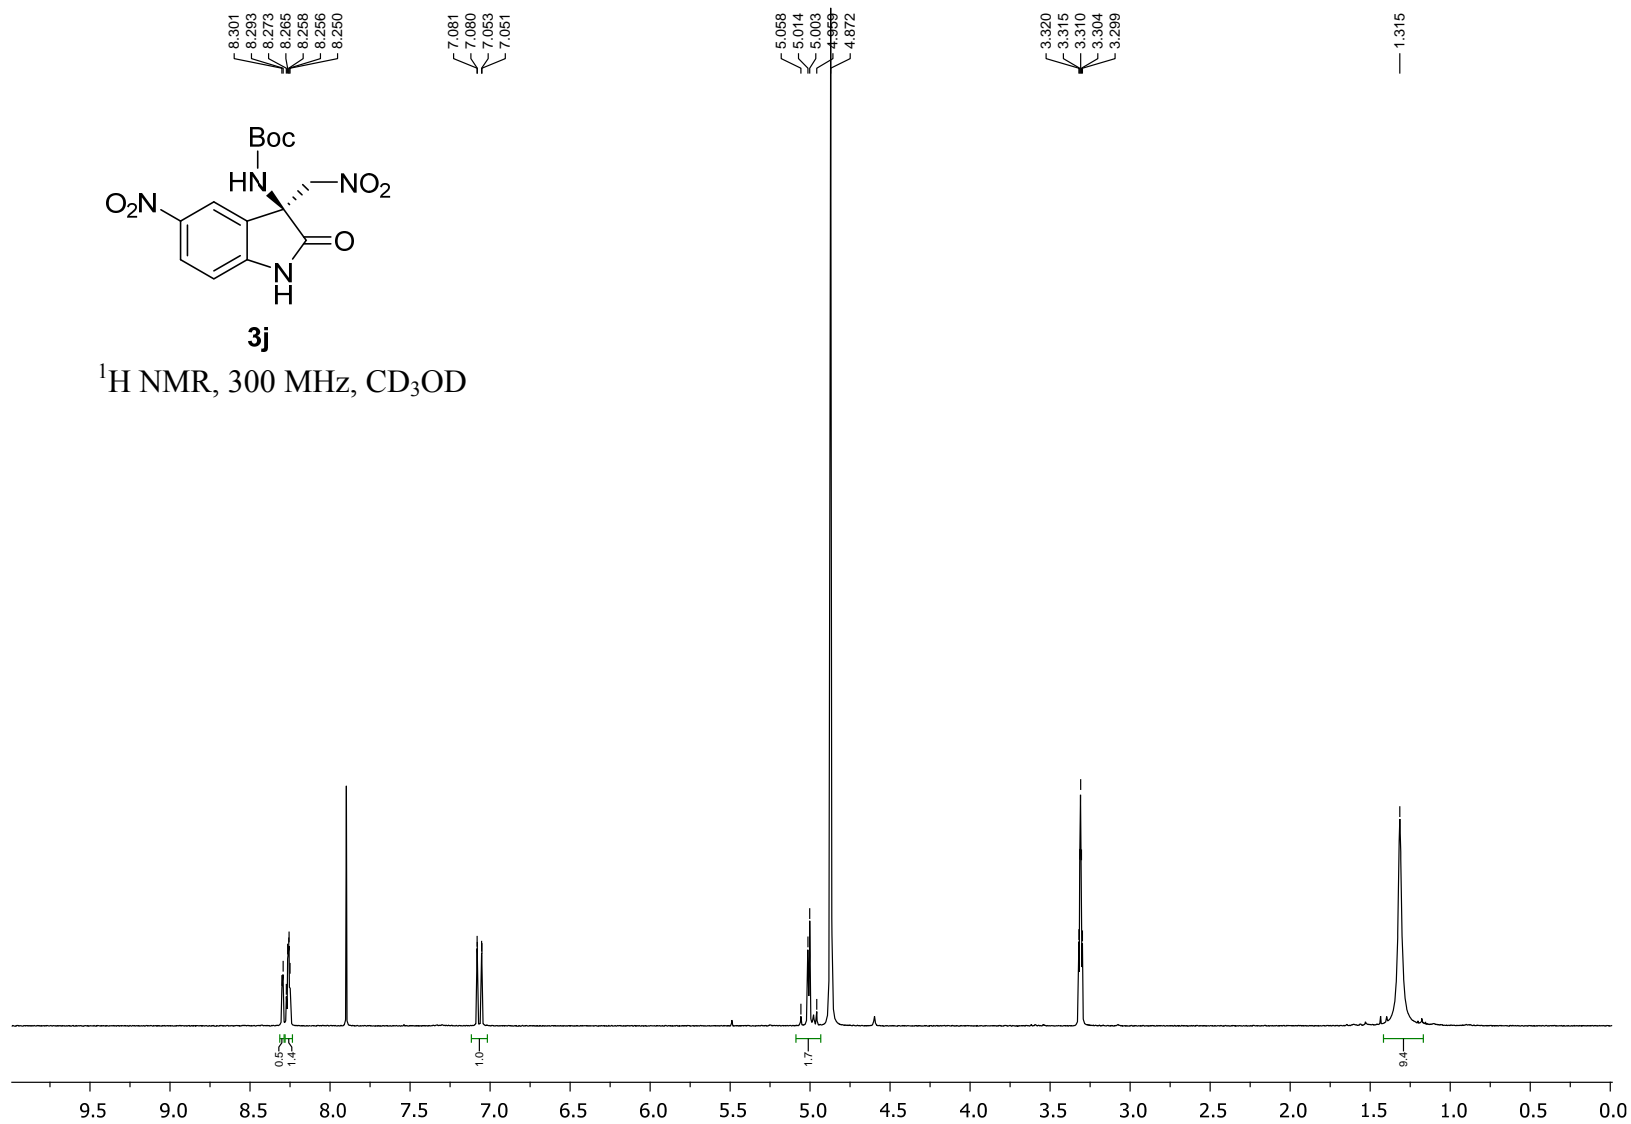

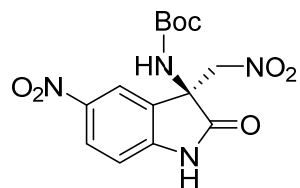

**3j**

$^{13}\text{C}$  NMR, 75 MHz,  $\text{CD}_3\text{OD}$

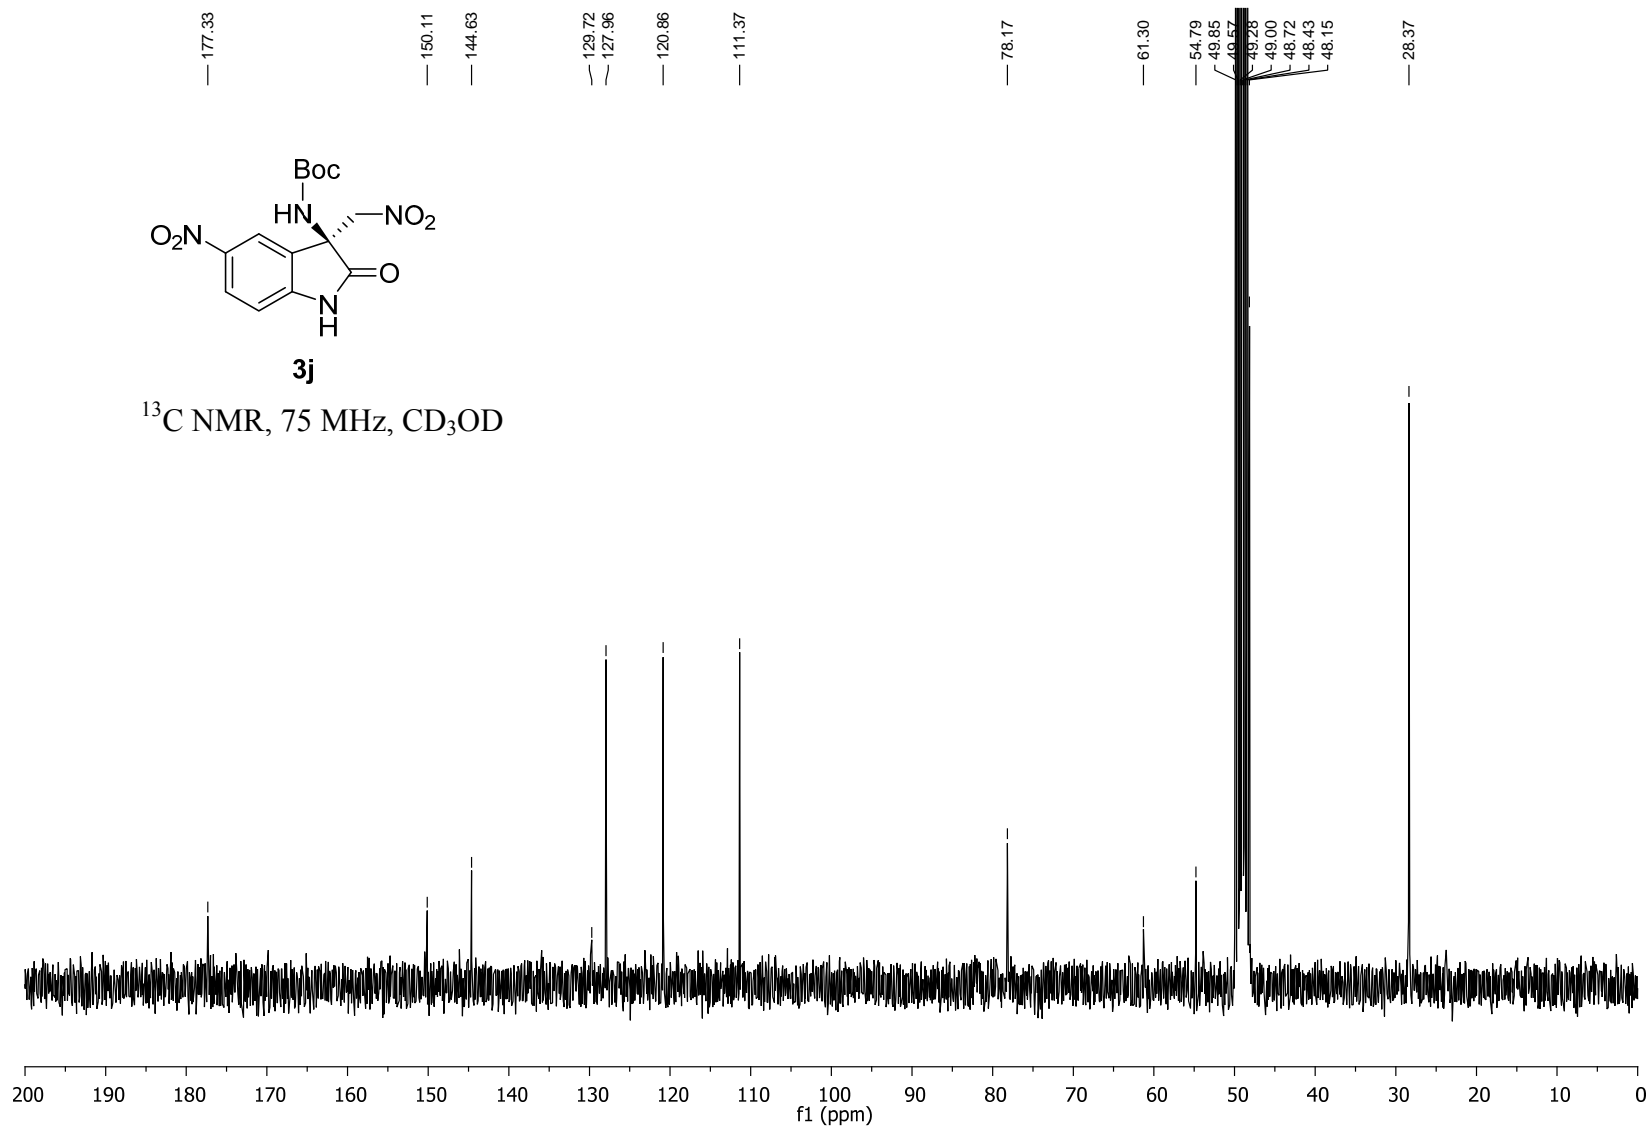

10.268

7.260  
7.211  
7.184  
6.911  
6.905  
6.885  
6.878  
6.862  
6.855  
6.240

4.847  
4.805  
4.604  
4.563

2.505

1.260

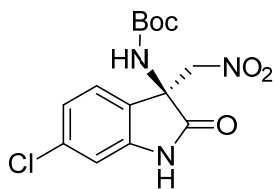

**3k**

<sup>1</sup>H NMR, 300 MHz, CDCl<sub>3</sub> + CD<sub>3</sub>OD

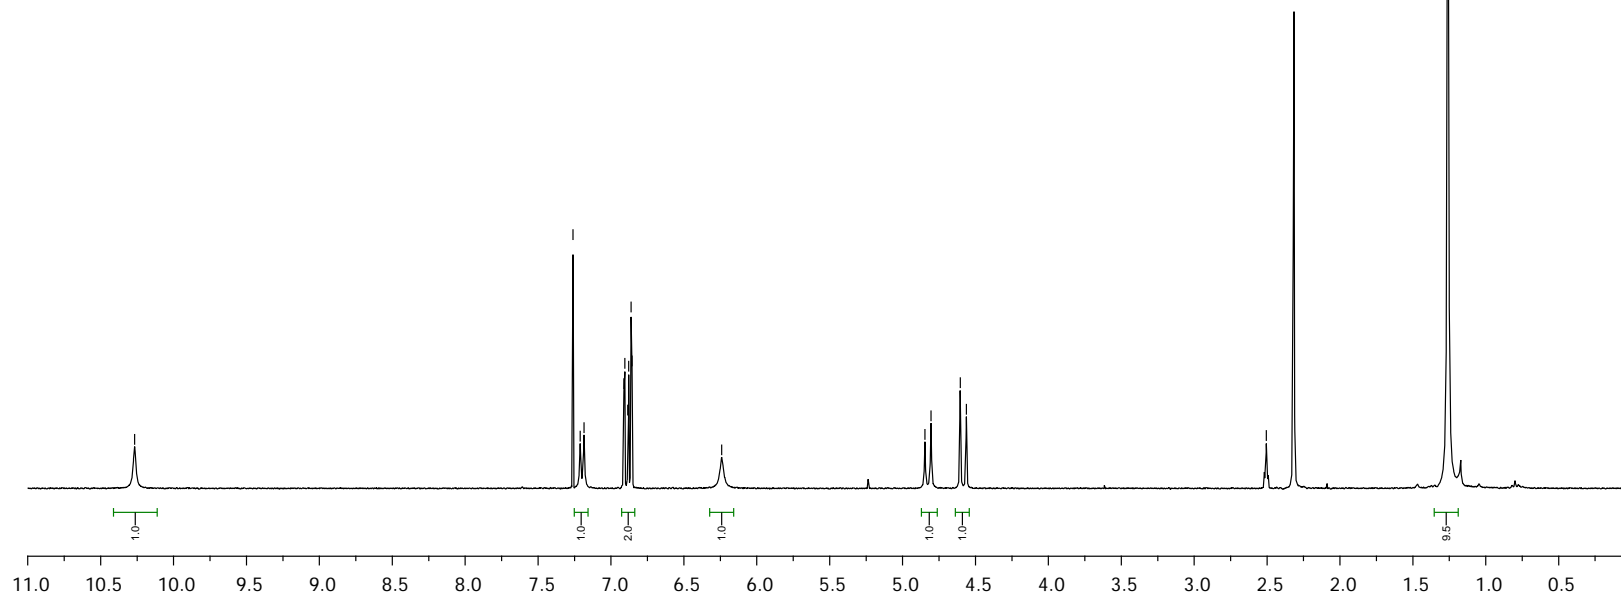

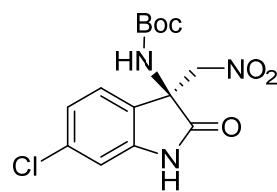

**3k**

$^{13}\text{C}$  NMR, 75 MHz,  $\text{CDCl}_3$  +  $\text{CD}_3\text{OD}$

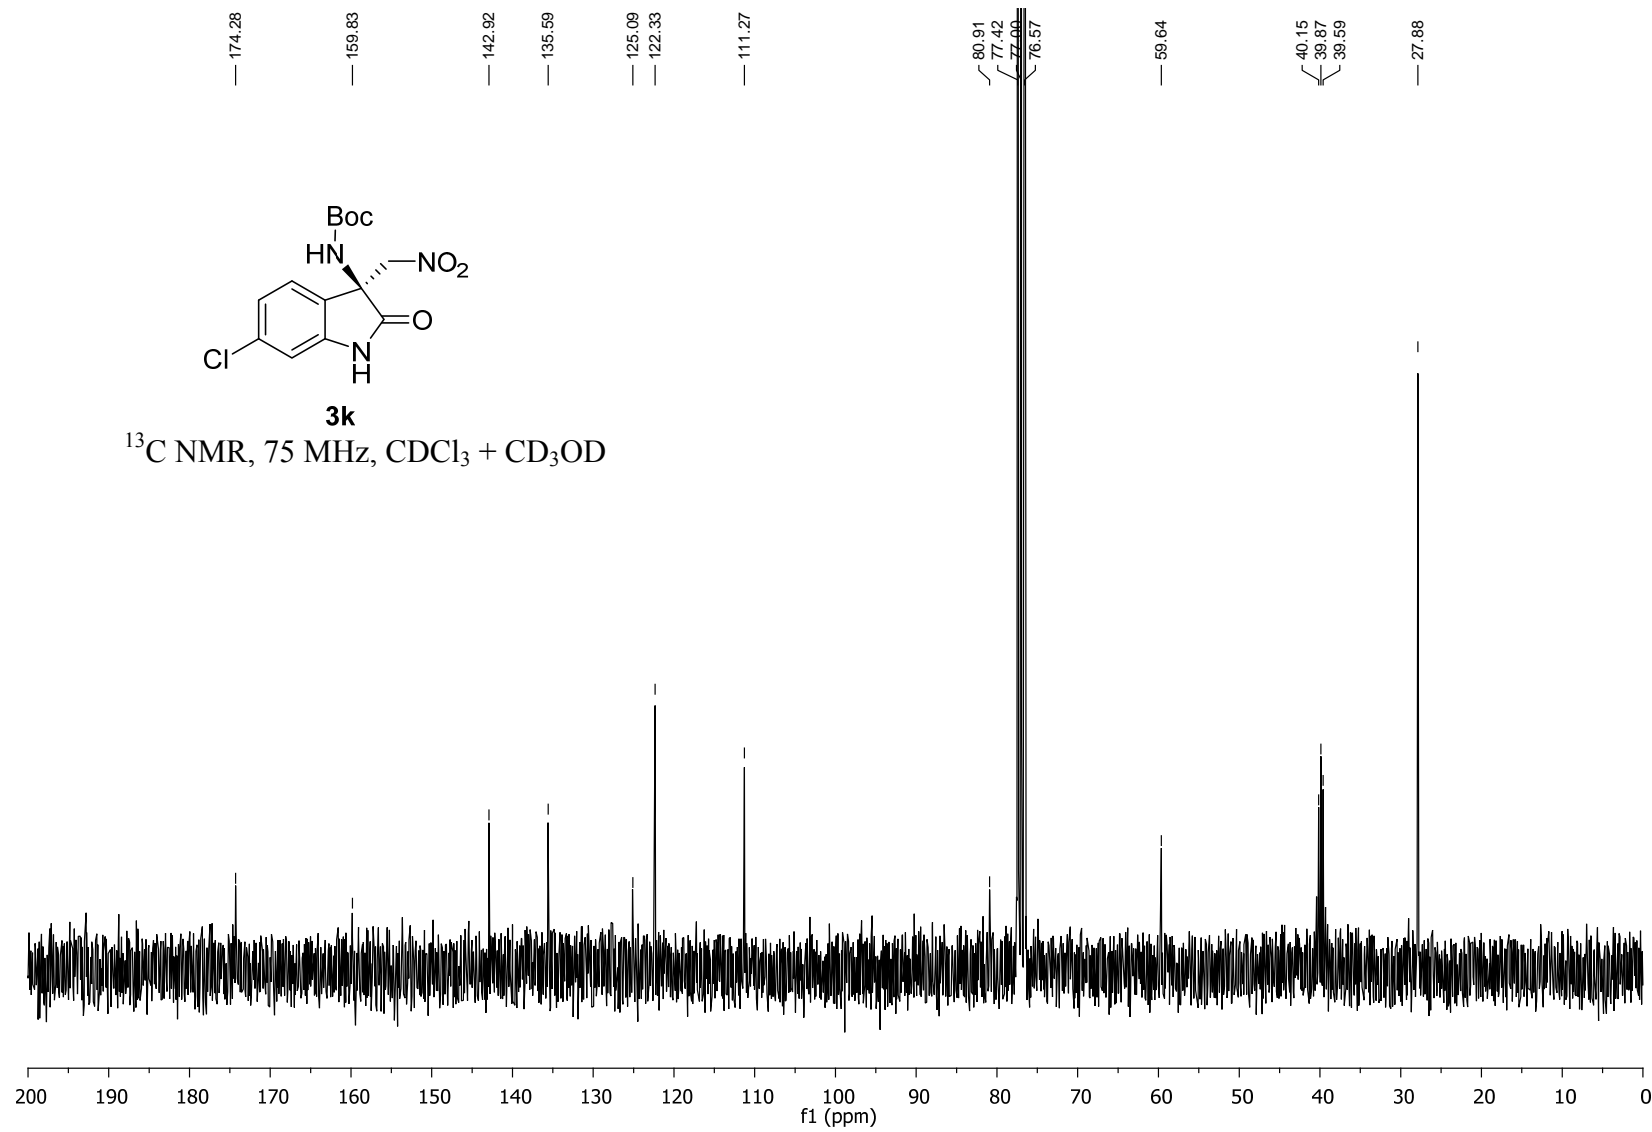

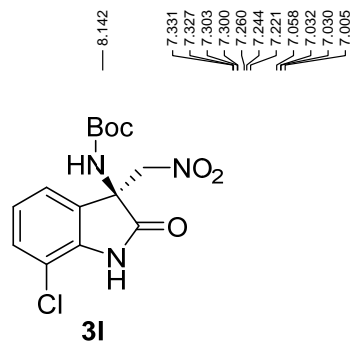

<sup>1</sup>H NMR, 300 MHz, CDCl<sub>3</sub>

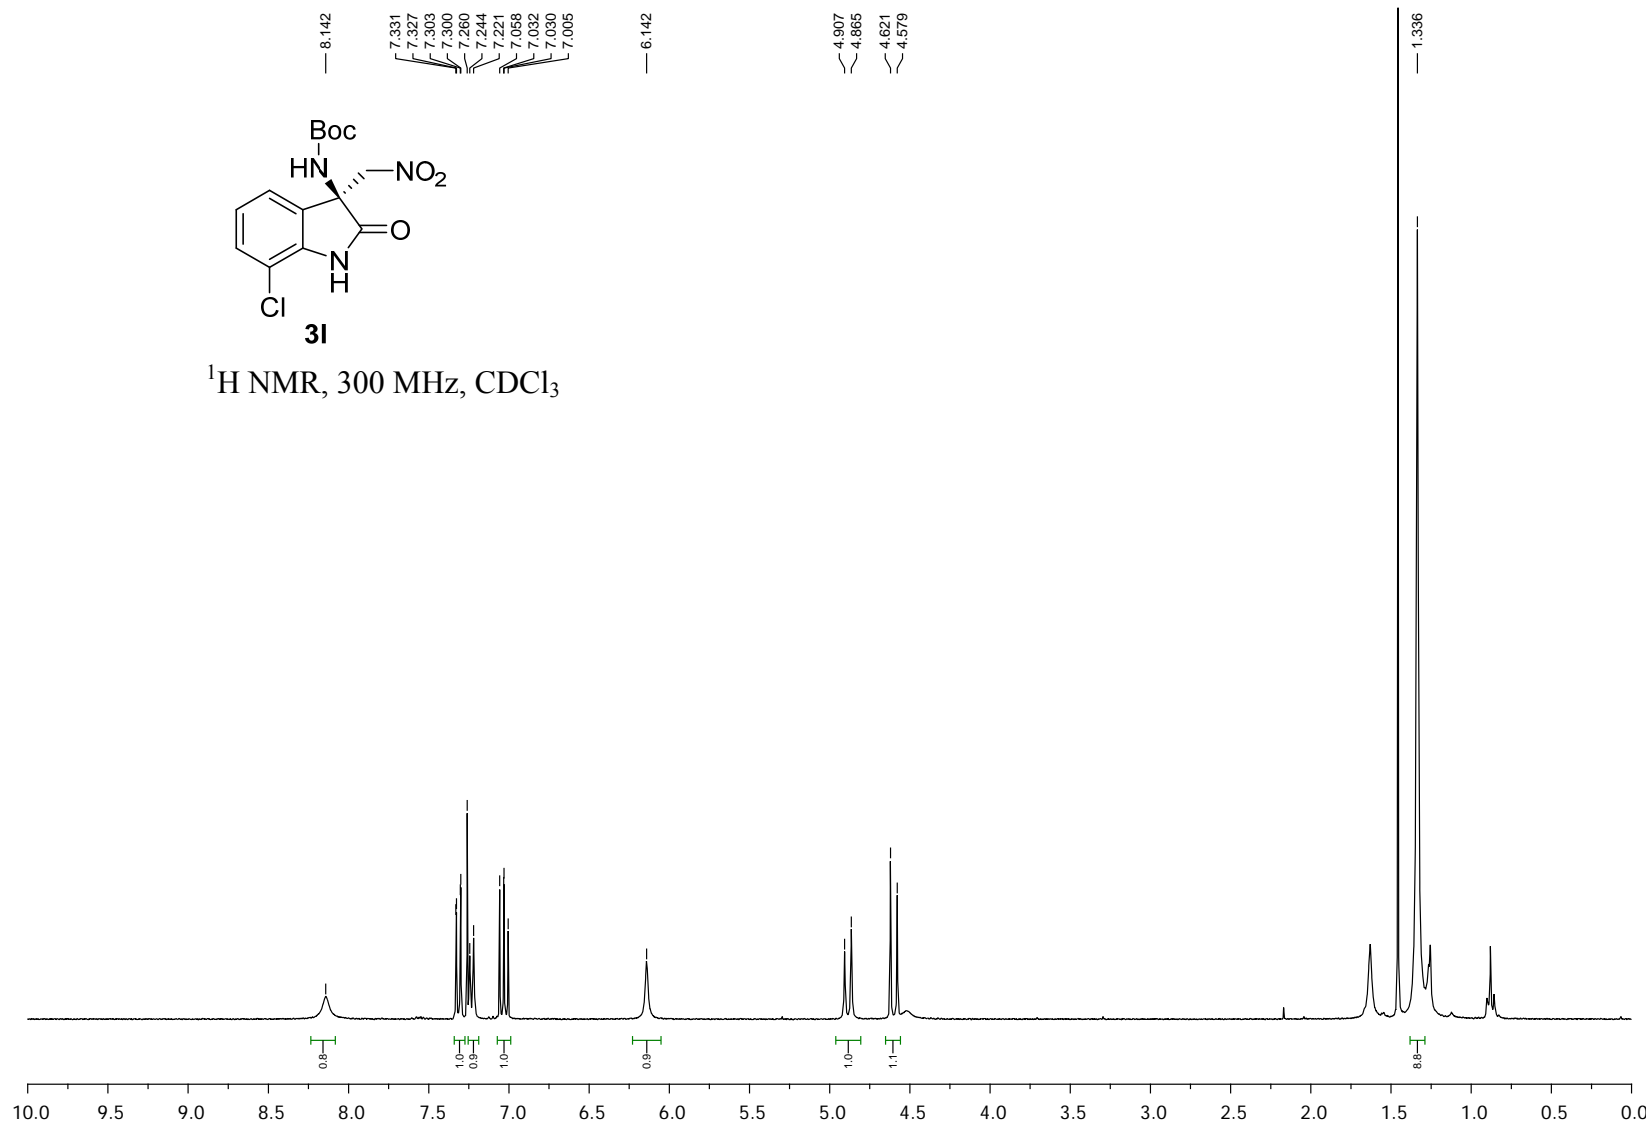

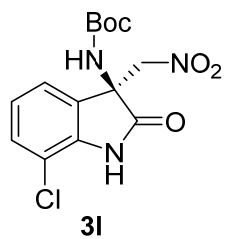

$^{13}\text{C}$  NMR, 75 MHz,  $\text{CDCl}_3$

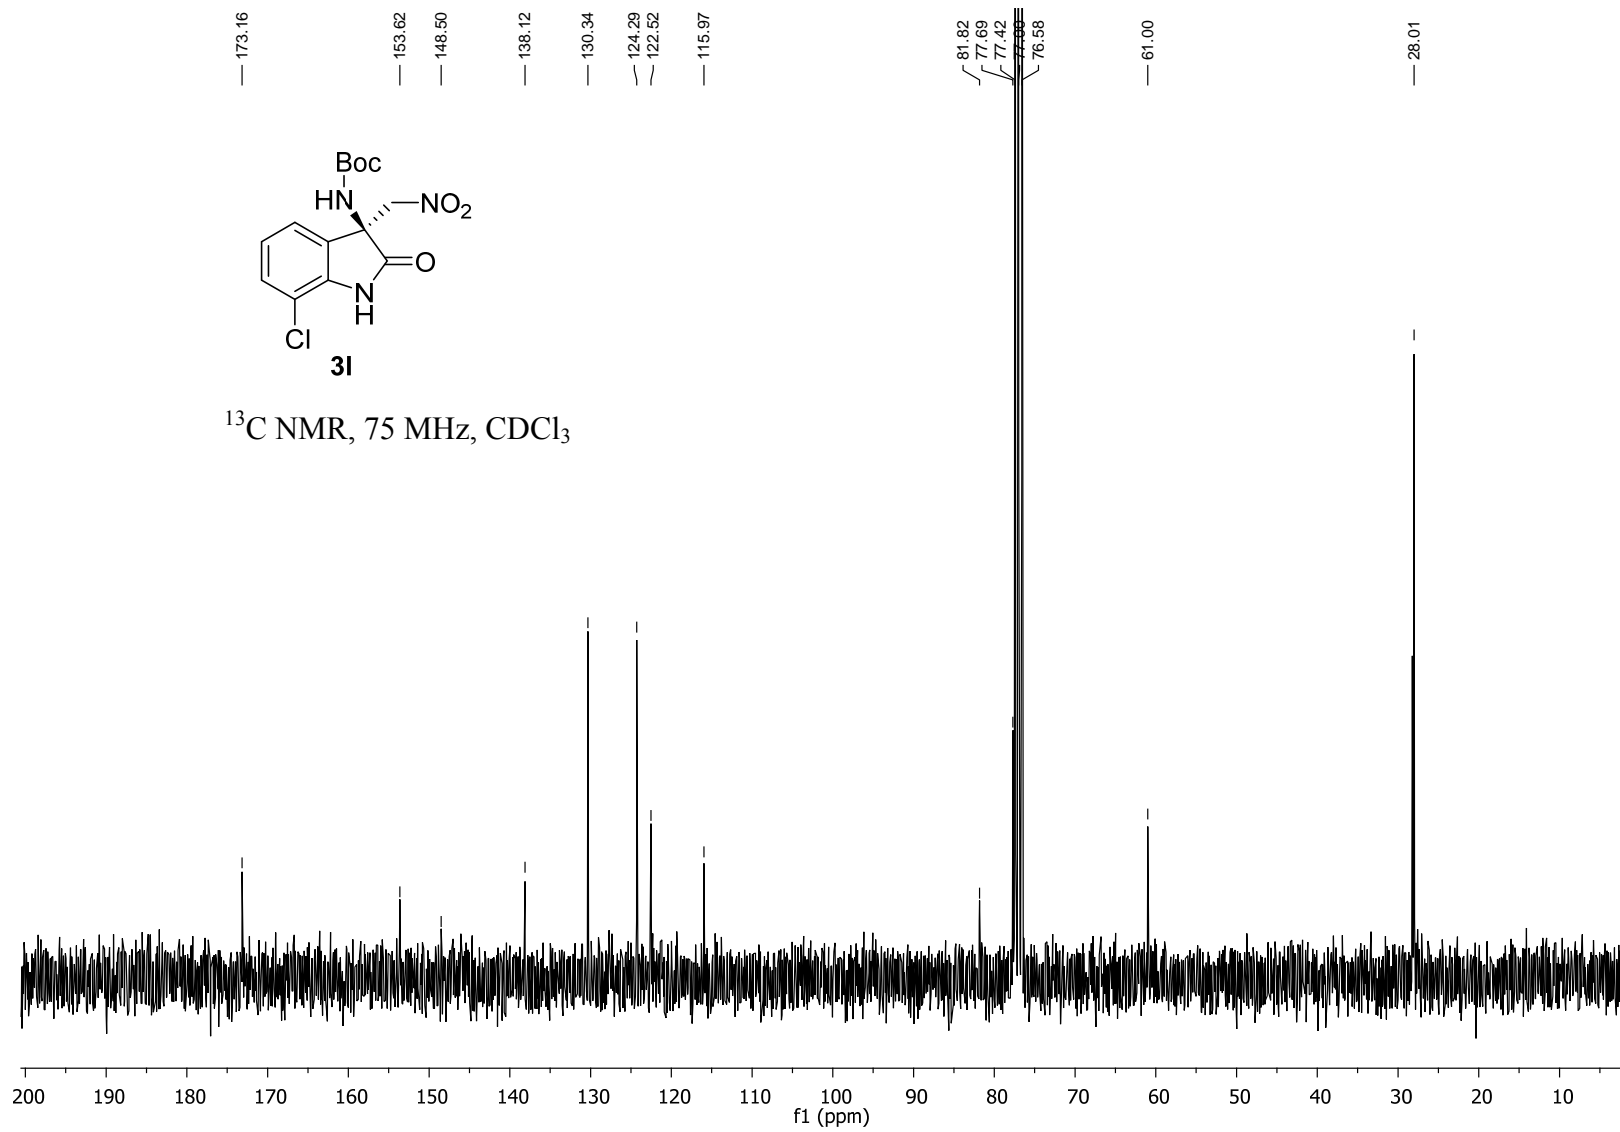

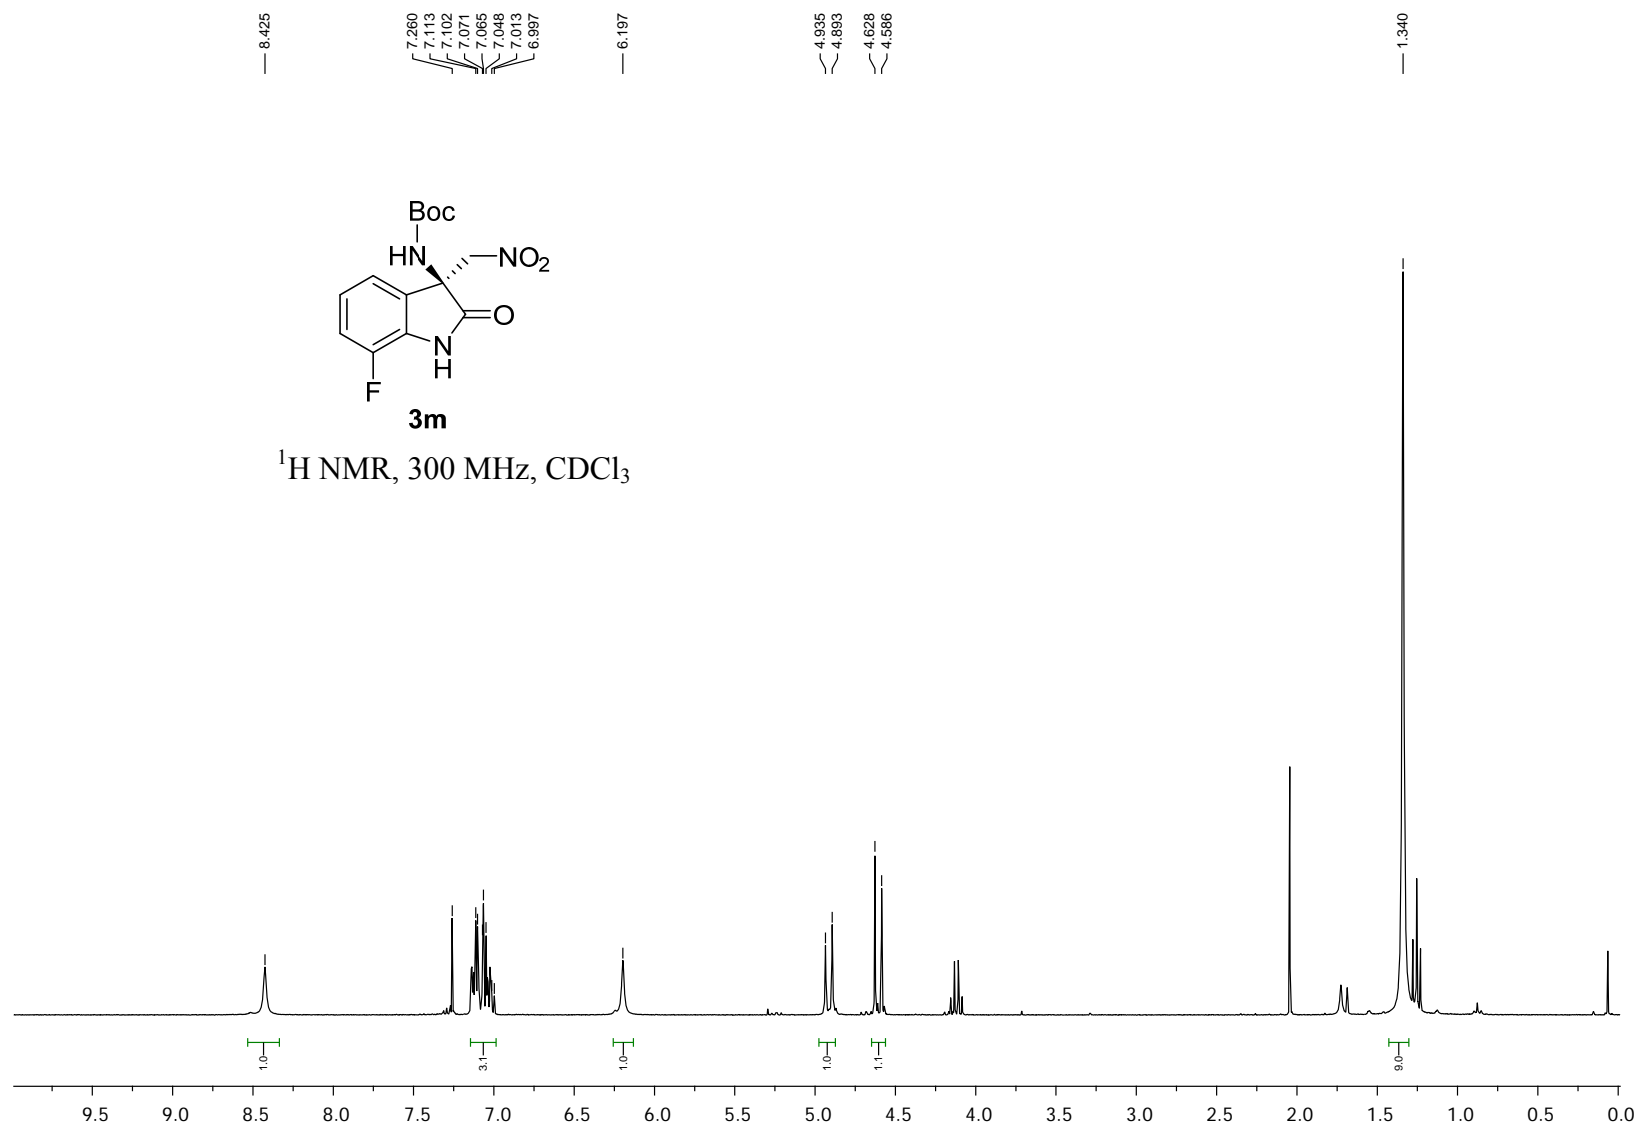



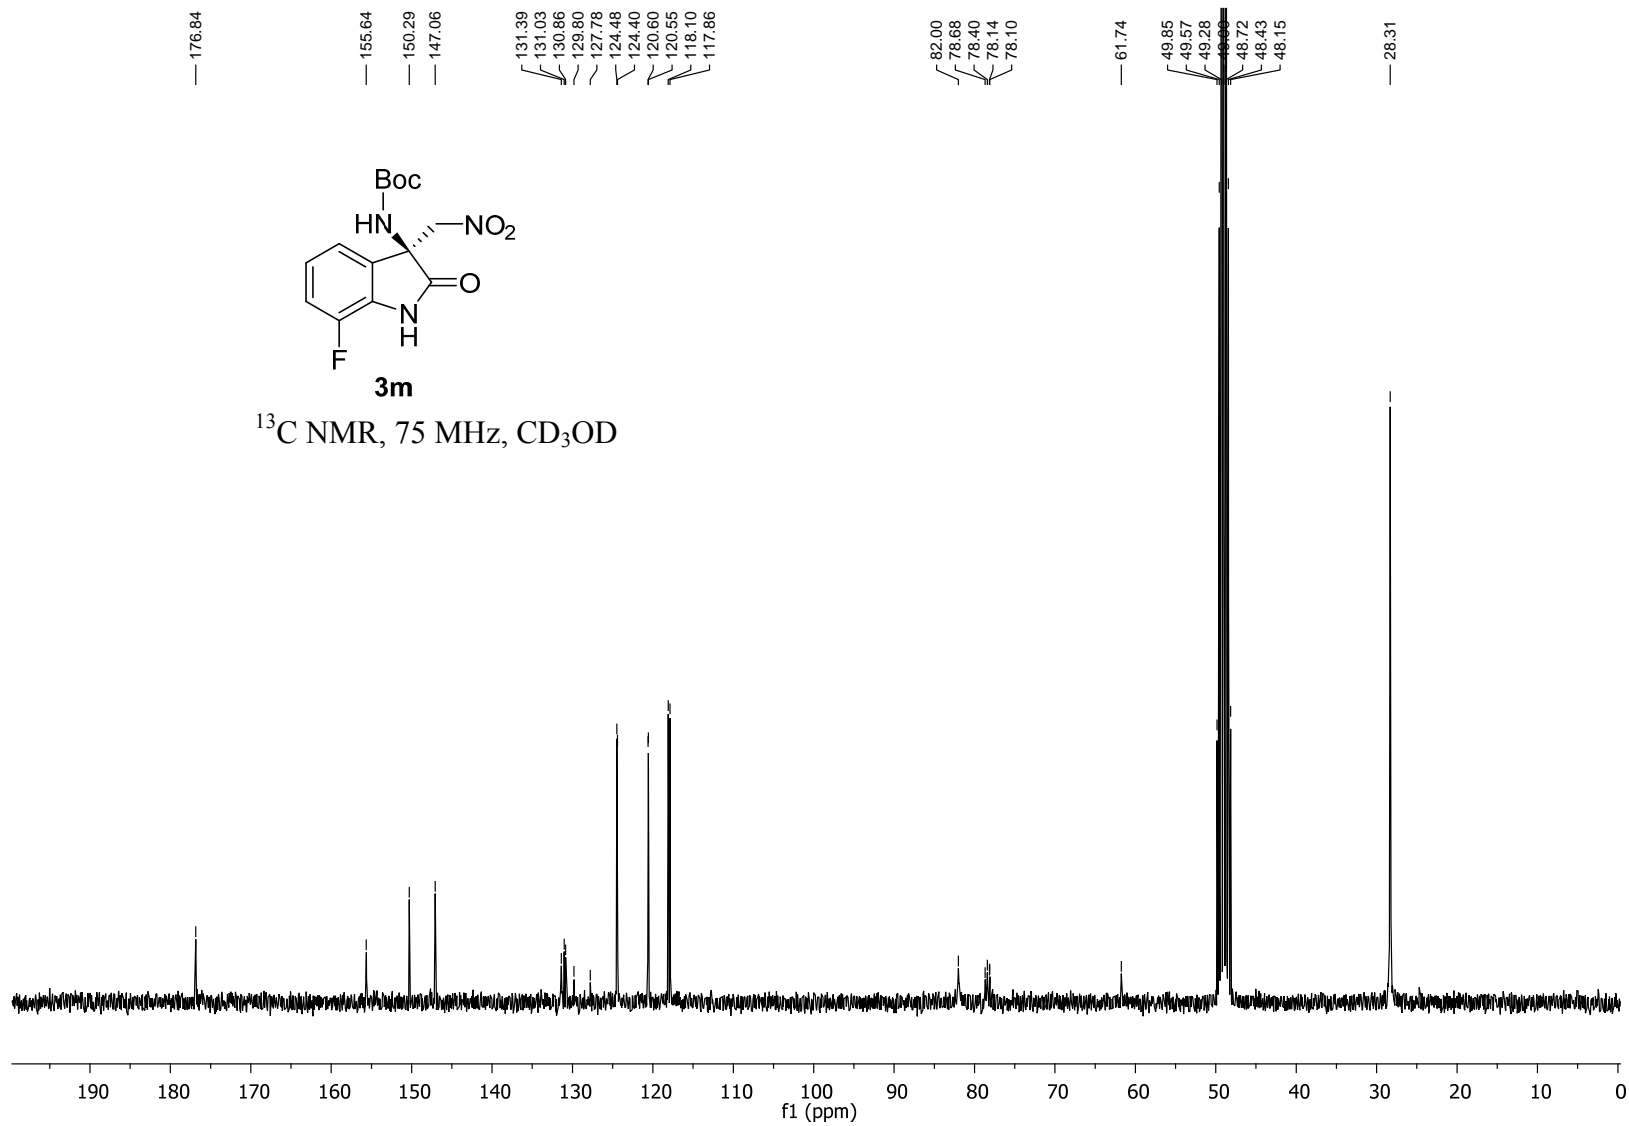

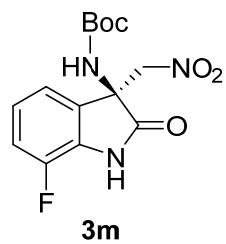

$^{19}\text{F}$  NMR, 282 MHz,  $\text{CD}_3\text{OD}$

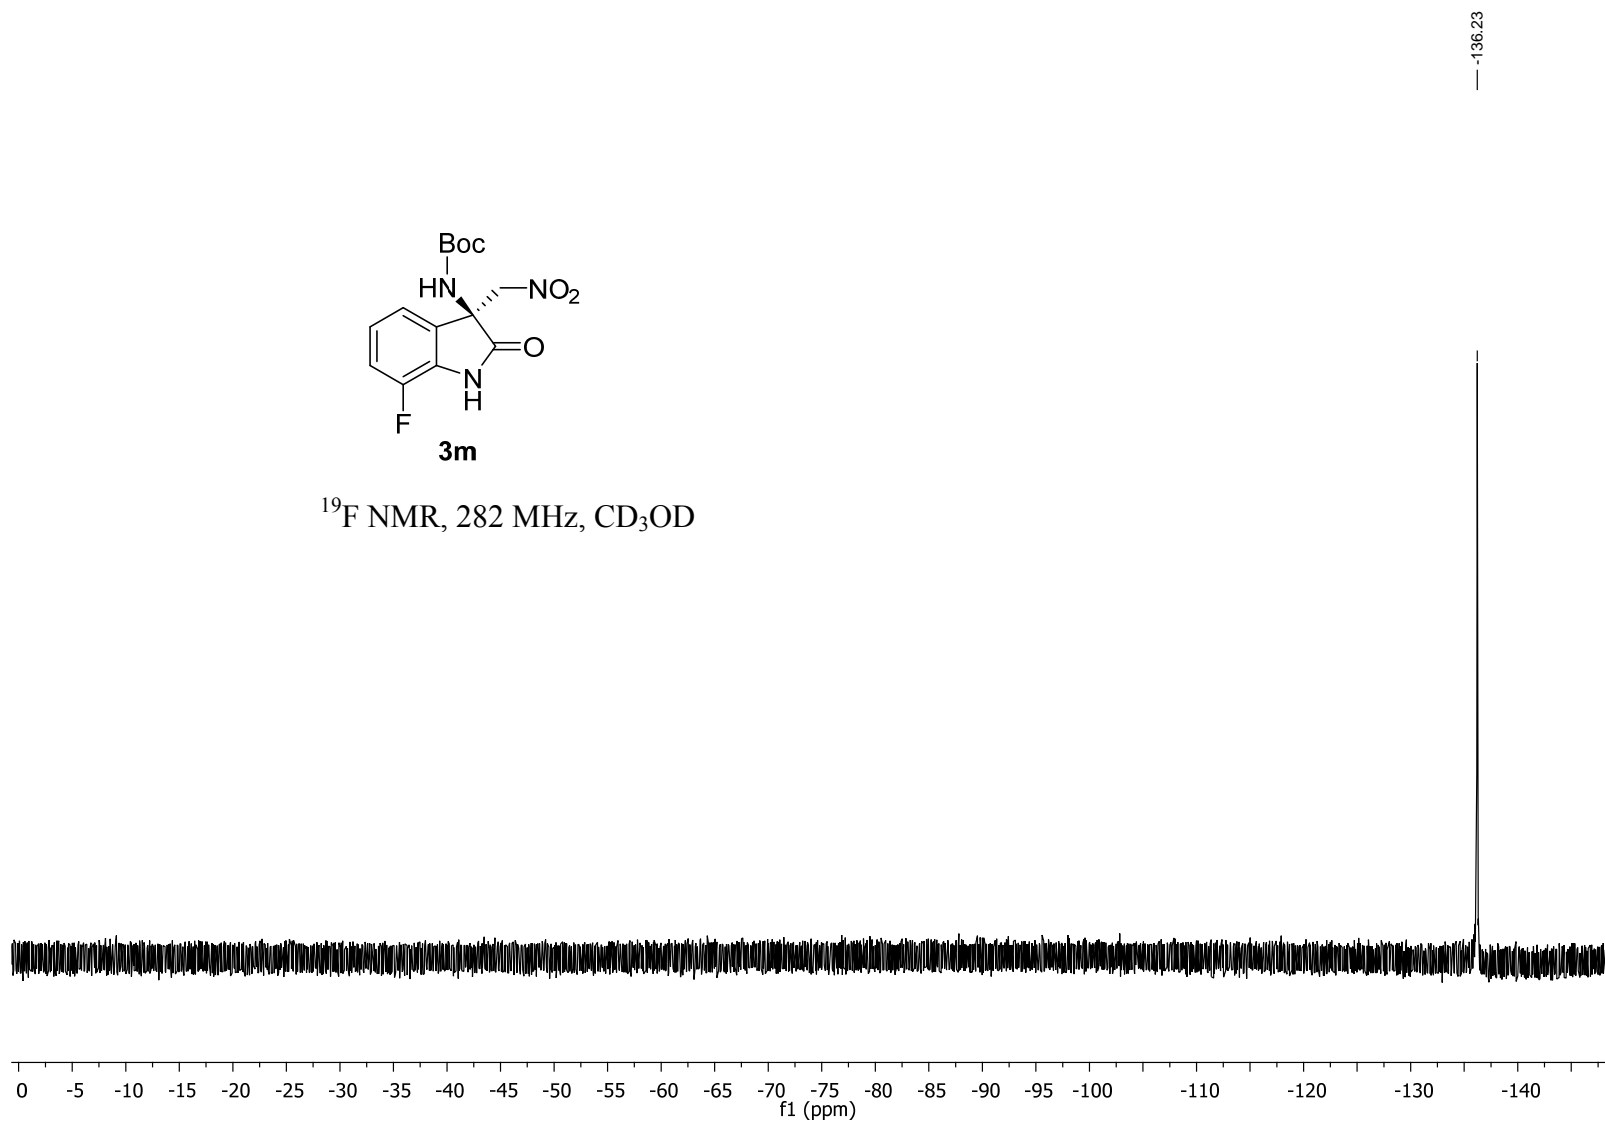

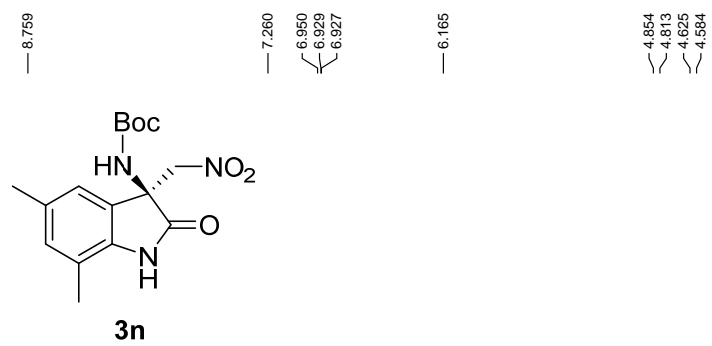

$^1\text{H NMR}$ , 300 MHz,  $\text{CDCl}_3$

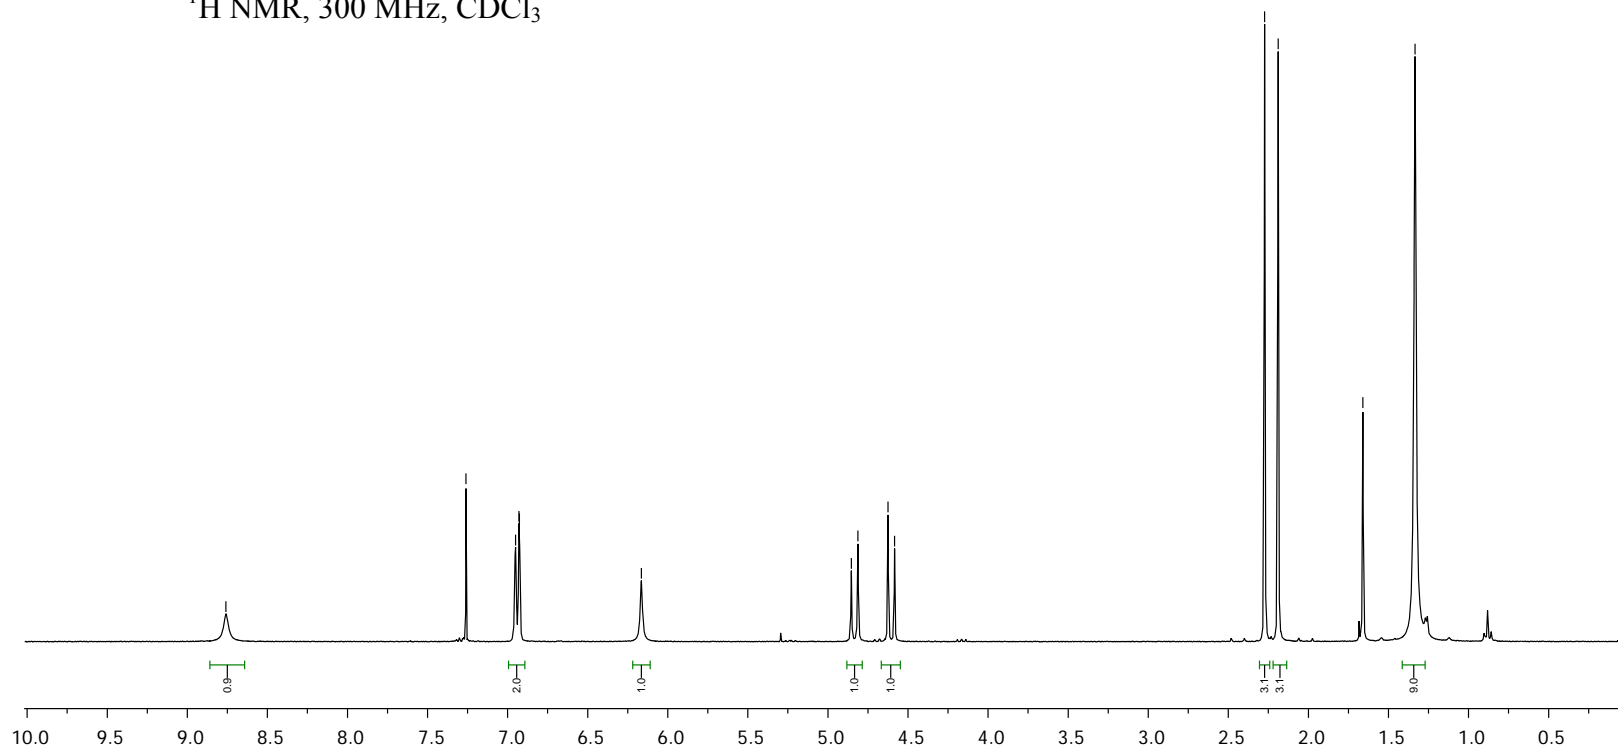

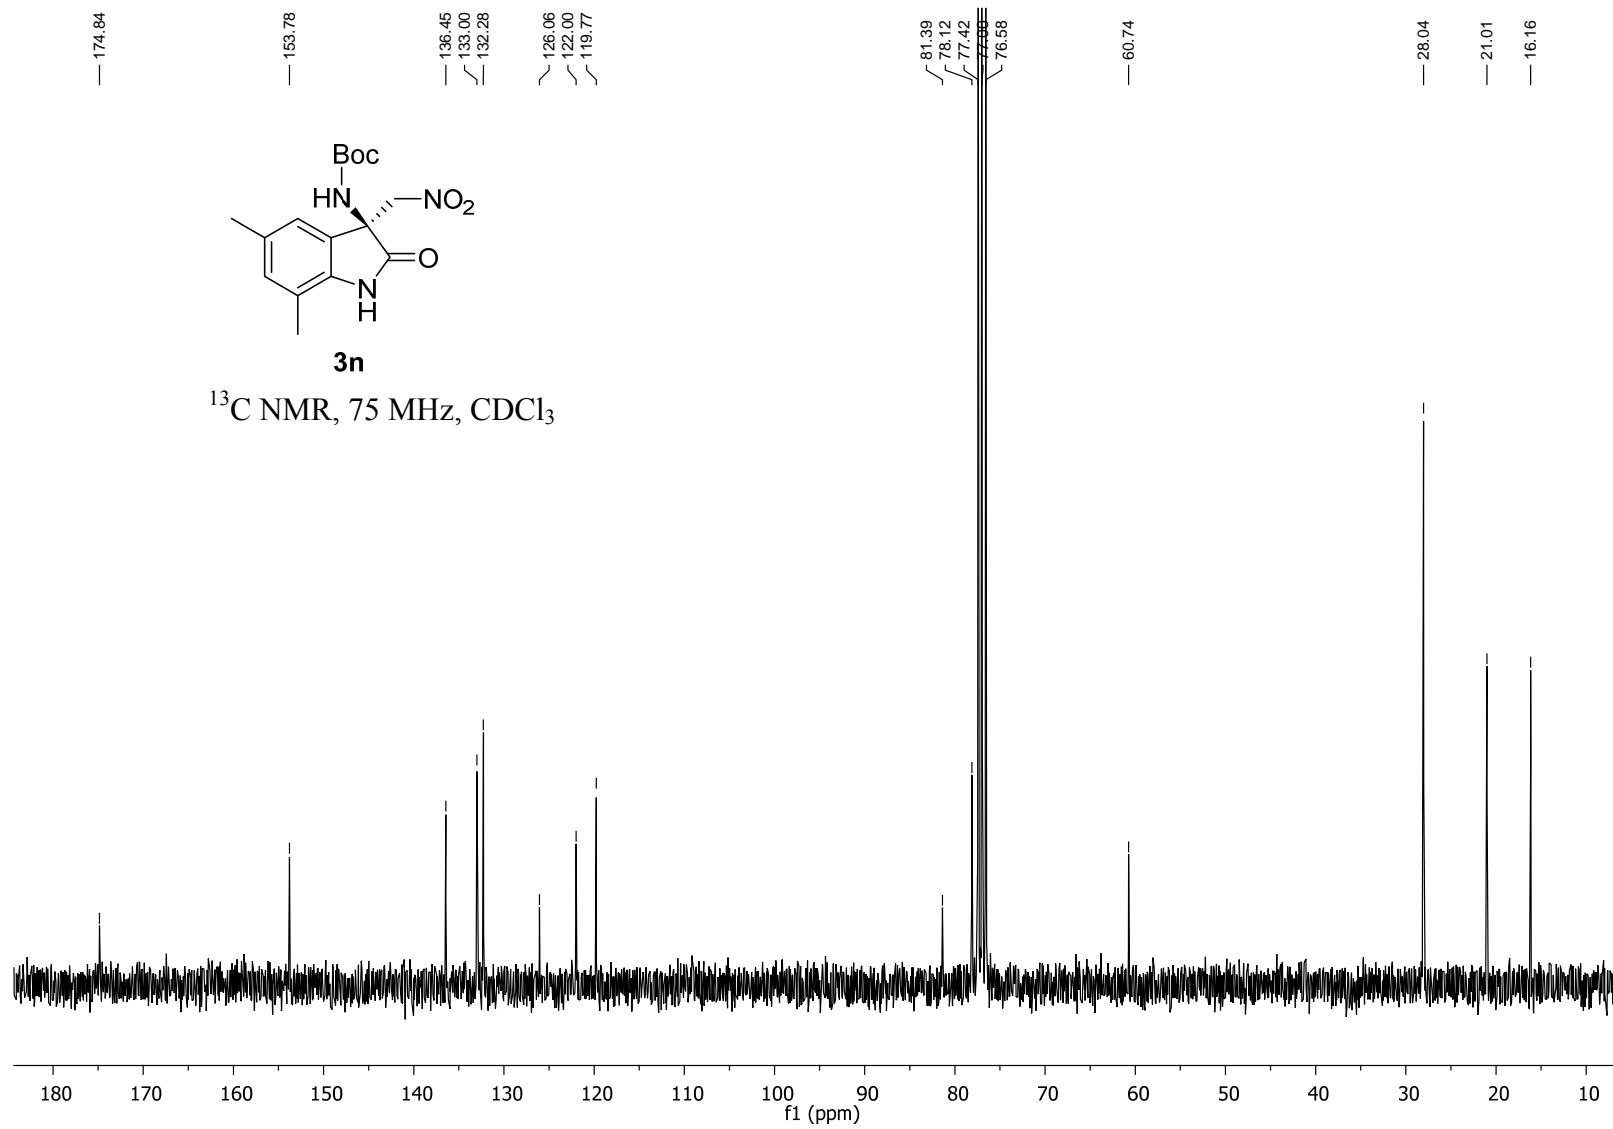

8.533  
7.260  
7.258  
7.236  
7.232  
7.124  
7.122  
7.120  
7.099  
7.097  
7.094  
7.041  
7.038  
7.016  
7.013  
6.925  
6.799  
6.262

4.970  
4.948  
4.925  
4.759  
4.736  
4.713  
4.690  
4.682  
4.676  
4.649

1.772  
1.749  
1.341  
1.322

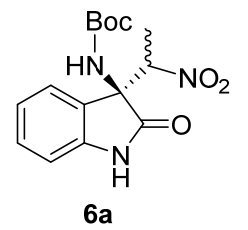

<sup>1</sup>H NMR, 300 MHz, CDCl<sub>3</sub>

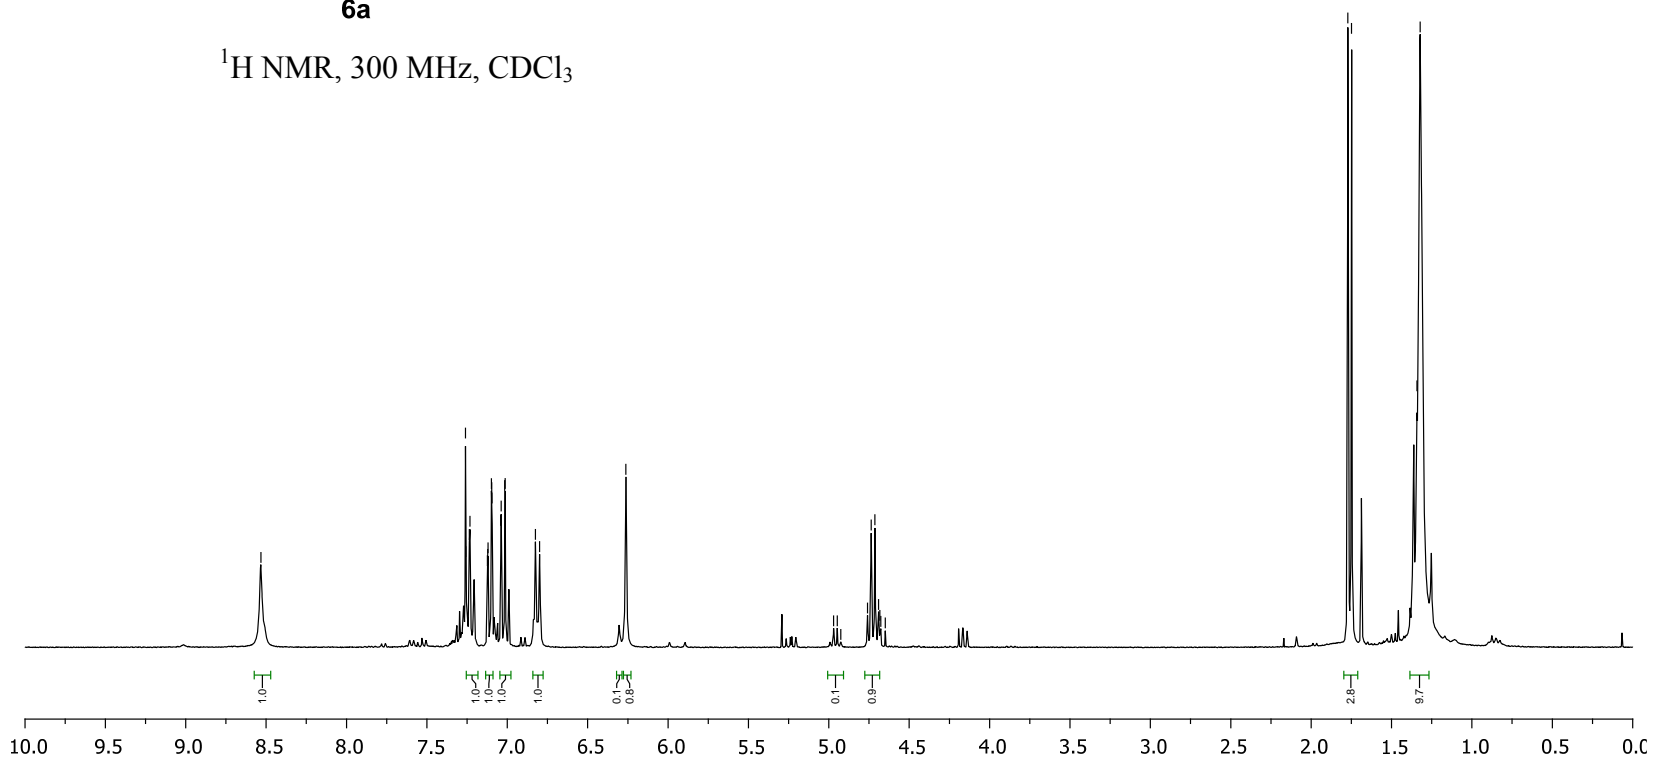

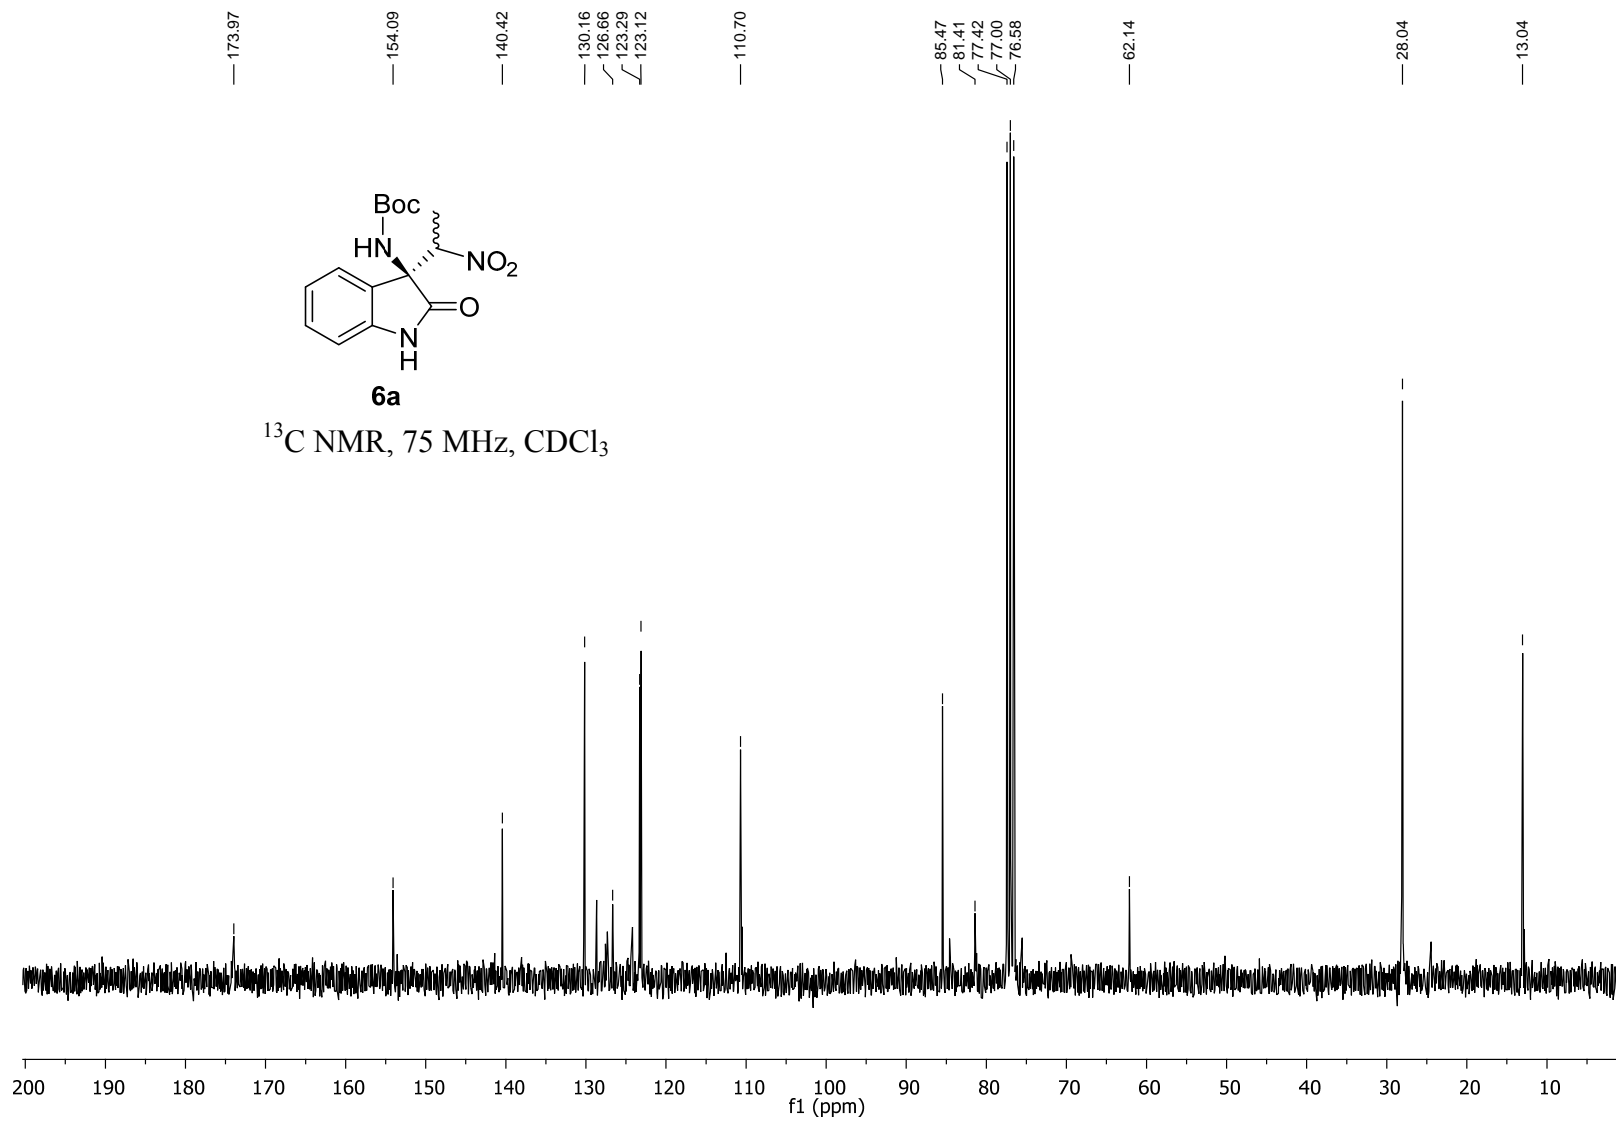

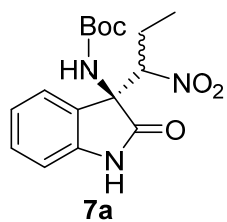

$^1\text{H NMR}$ , 300 MHz,  $\text{CDCl}_3$

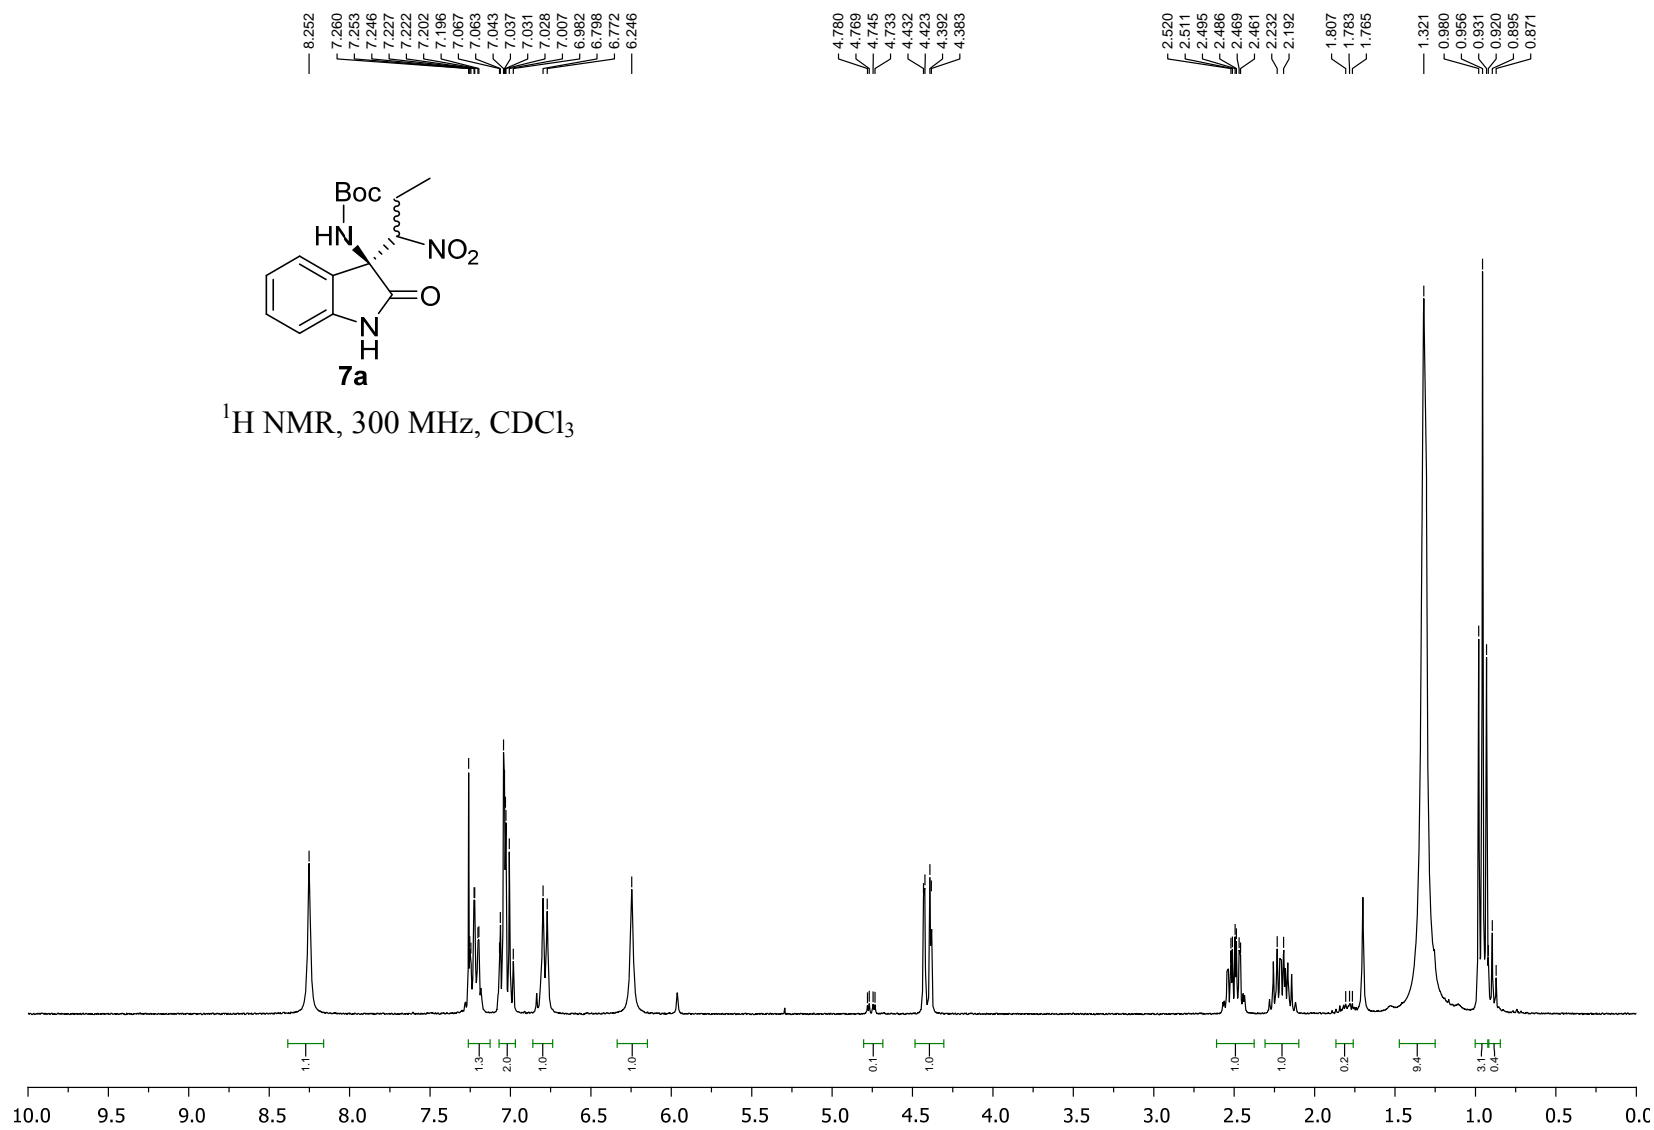

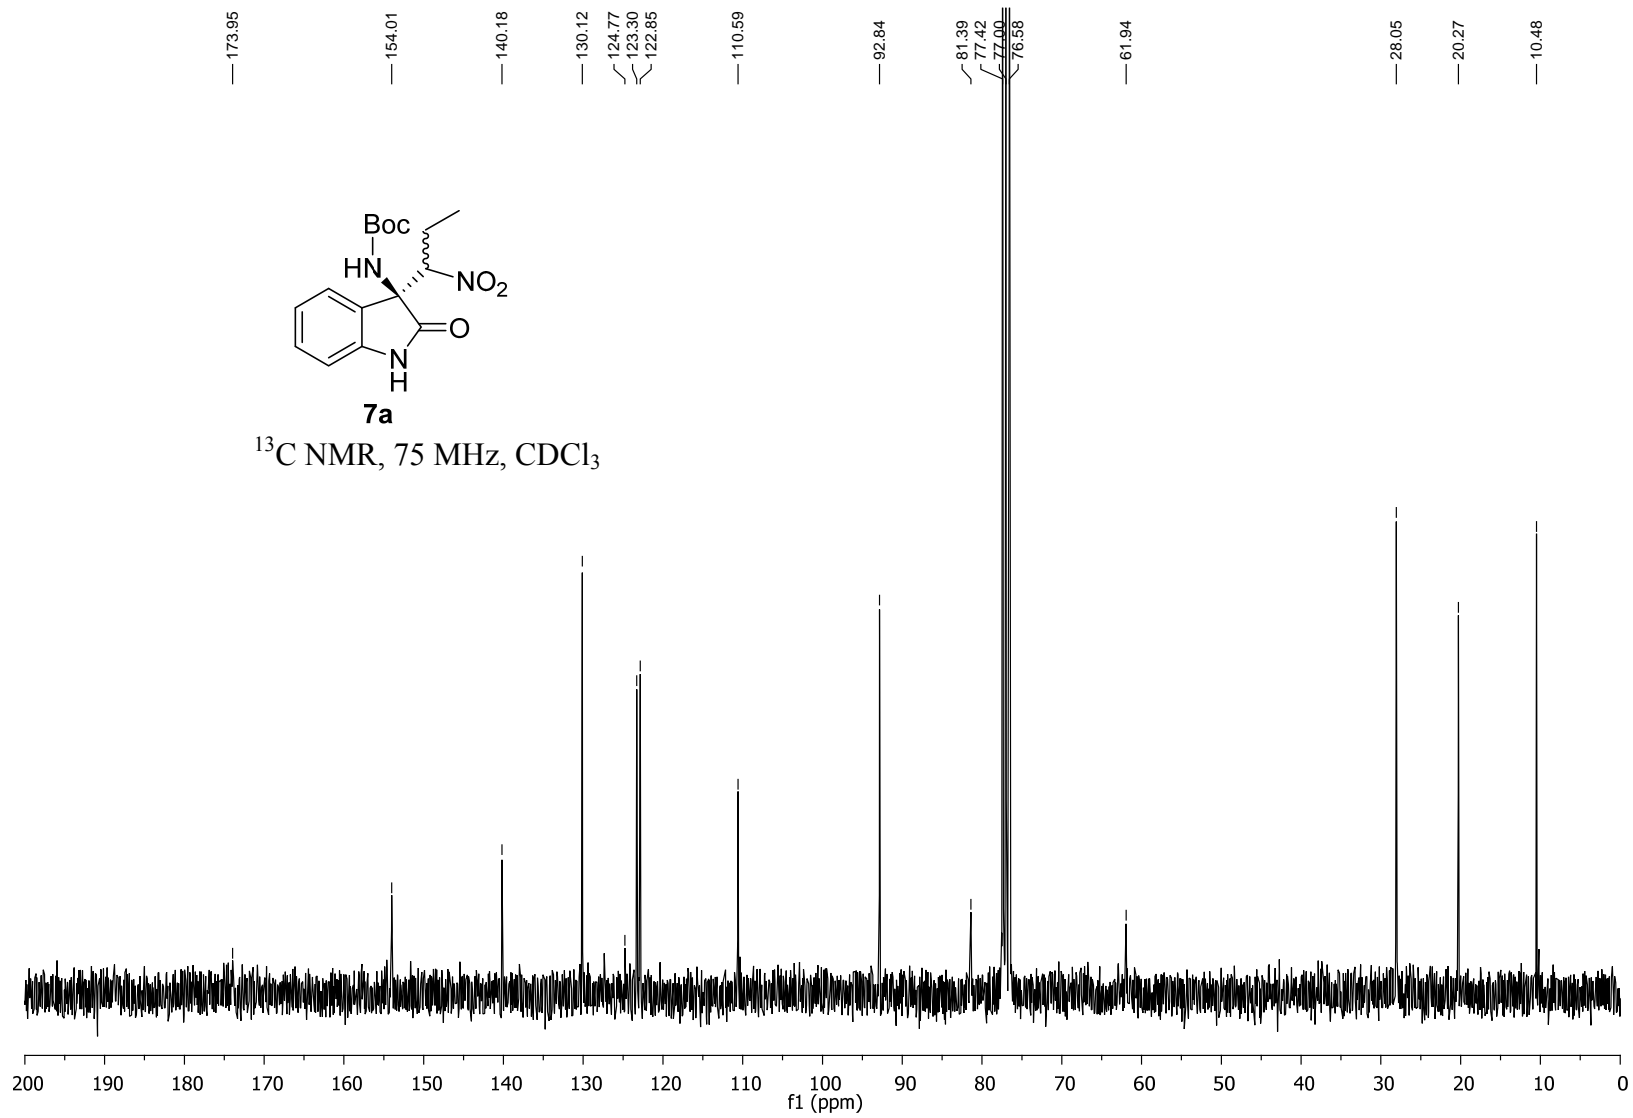



— 8.865

7.260  
7.017  
7.012  
7.004  
6.993  
6.988  
6.778  
6.734  
6.349  
6.327

4.977  
4.955  
4.932  
4.910  
4.701  
4.678  
4.655  
4.632

1.790  
1.767

1.358  
1.341  
1.318

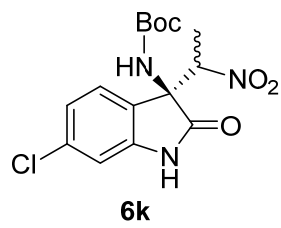

<sup>1</sup>H NMR, 300 MHz, CDCl<sub>3</sub>

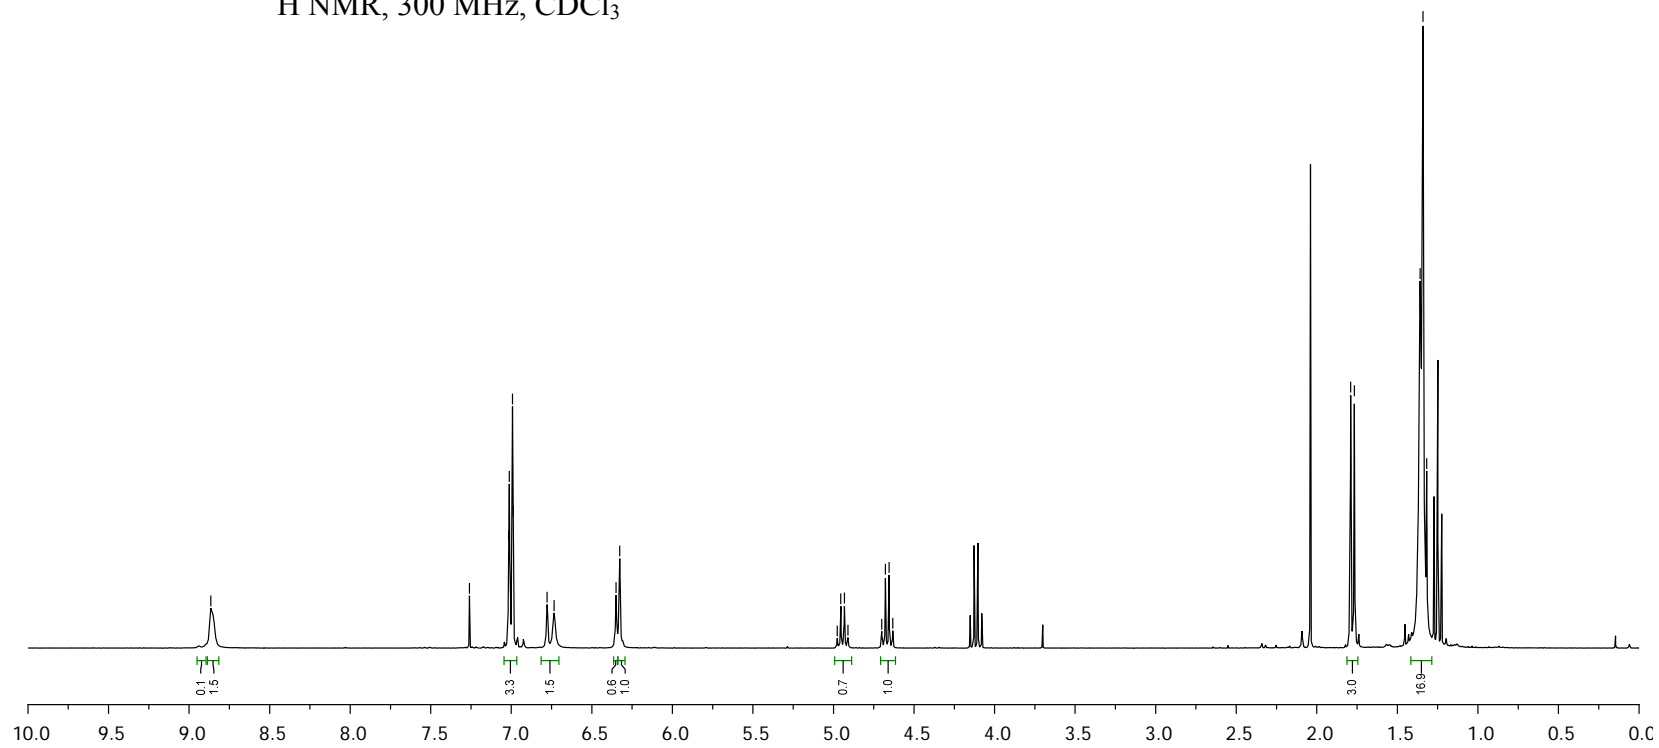

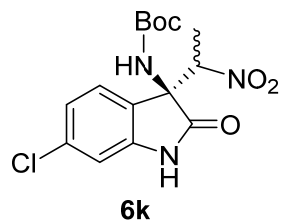

$^1\text{H}$  NMR, 300 MHz,  $\text{CDCl}_3$   
after crystallization

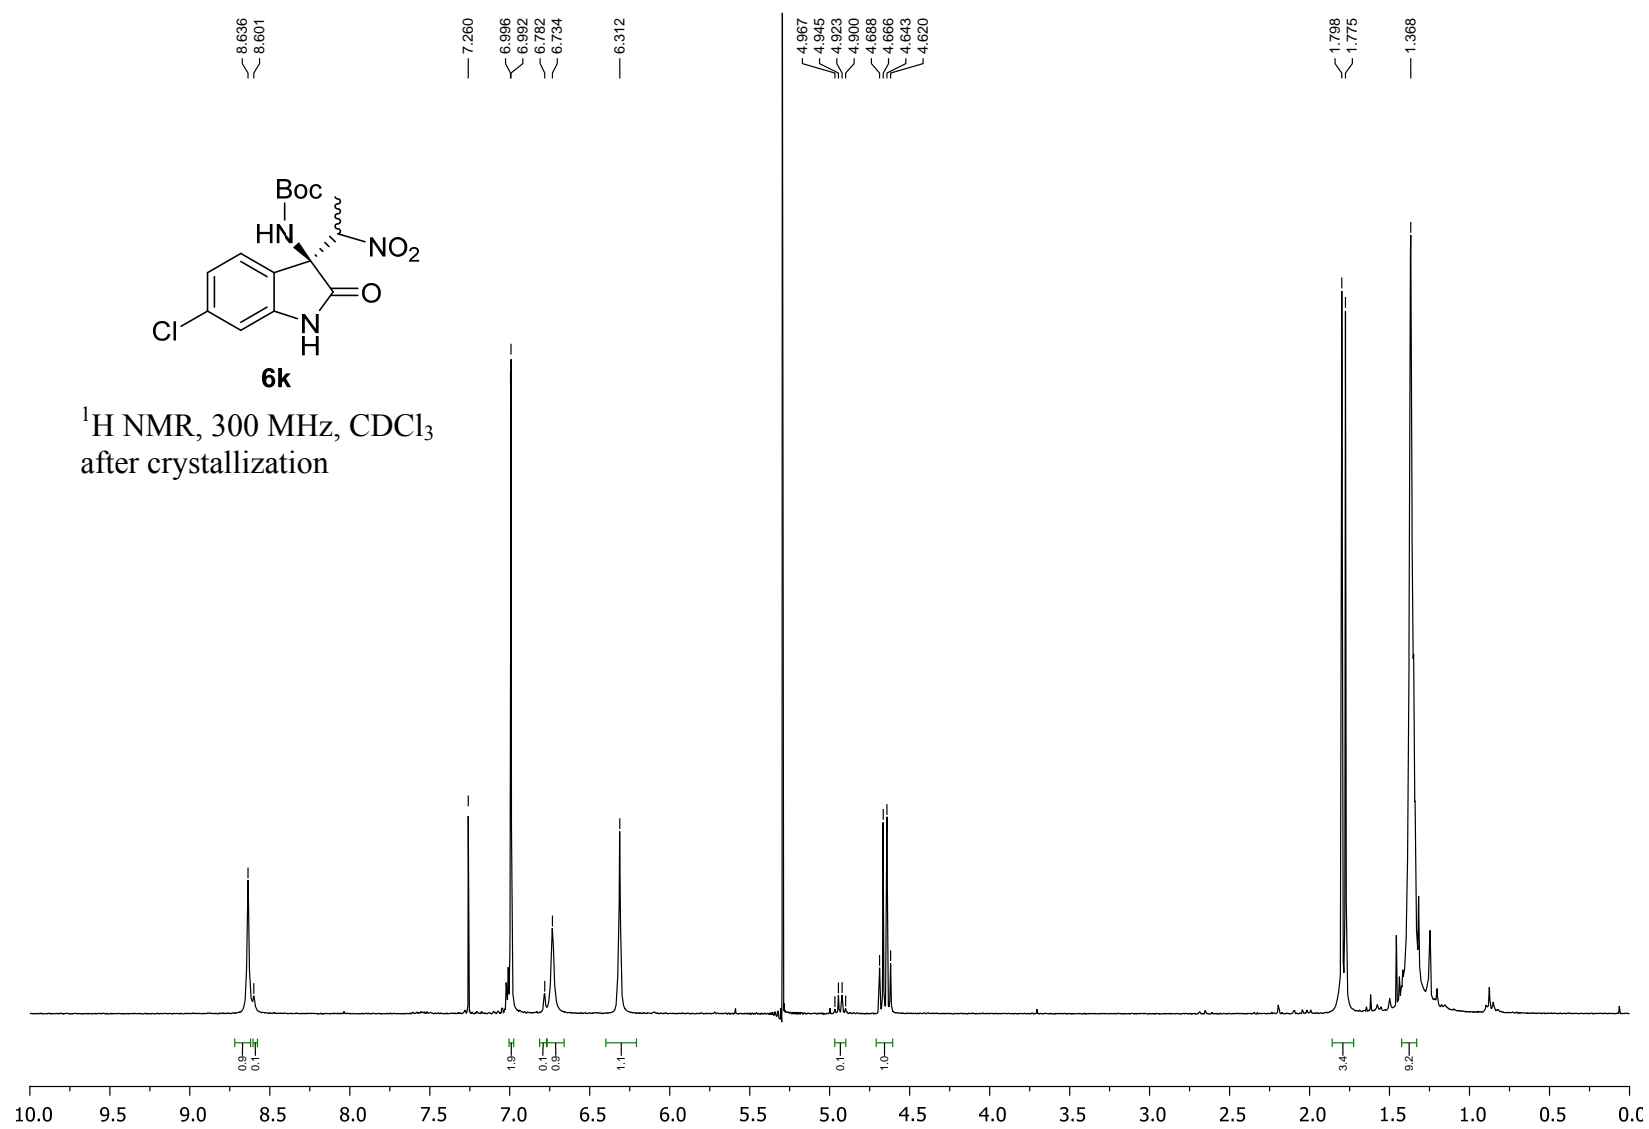

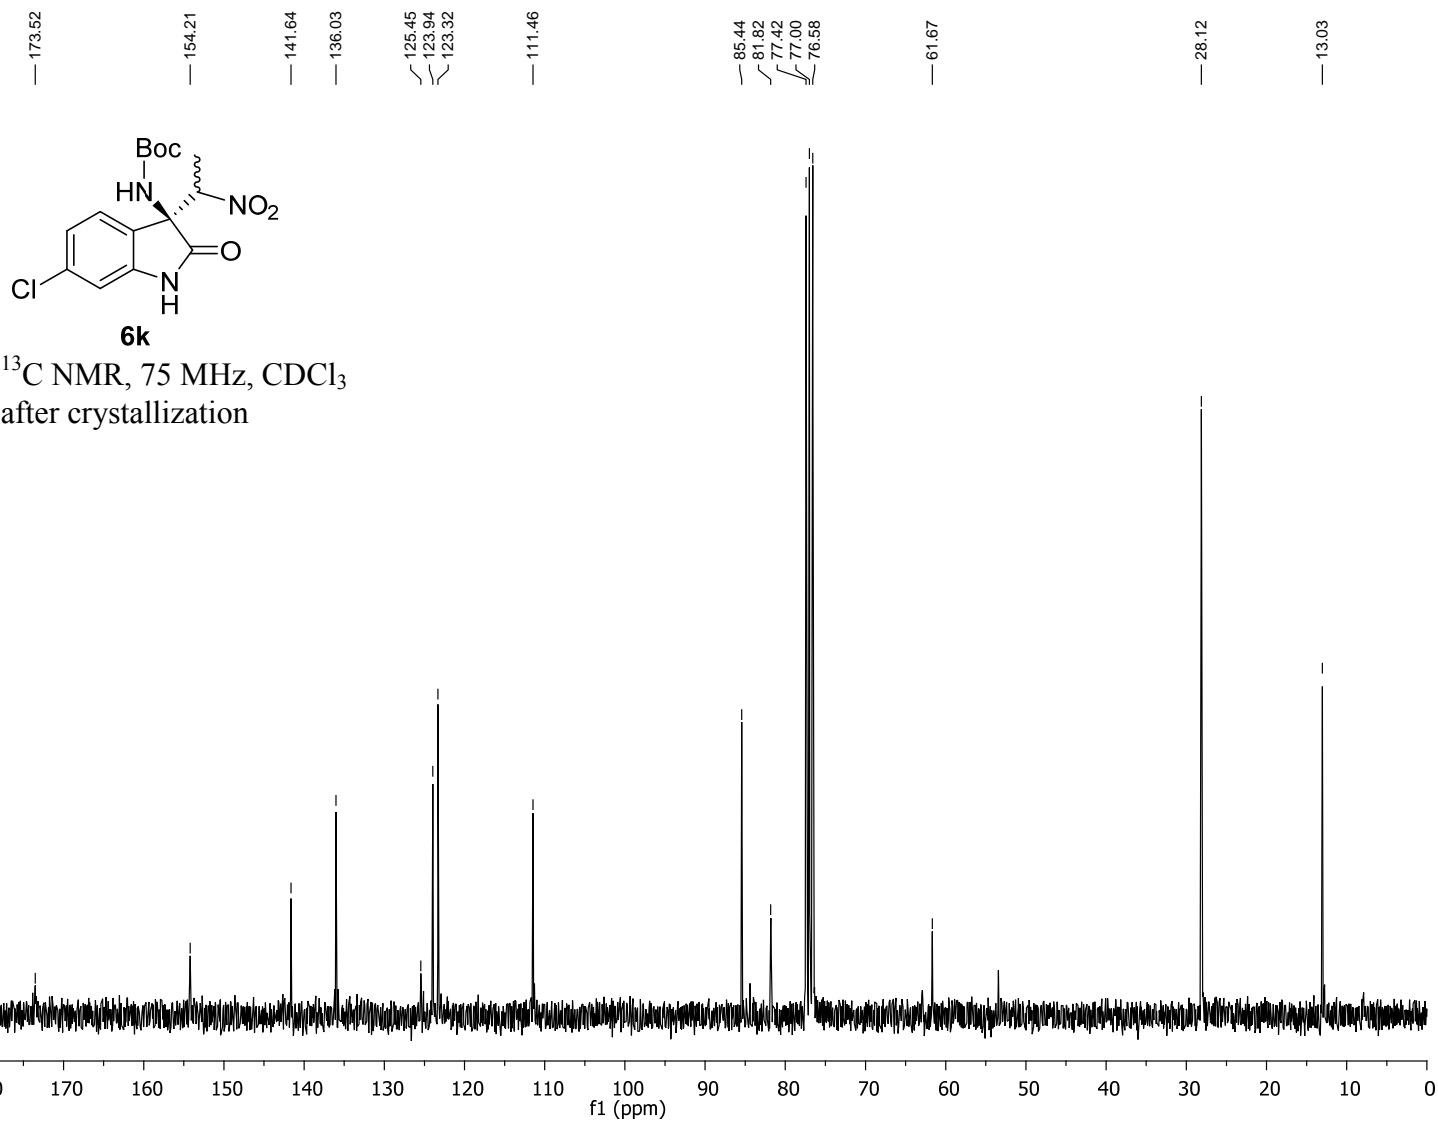

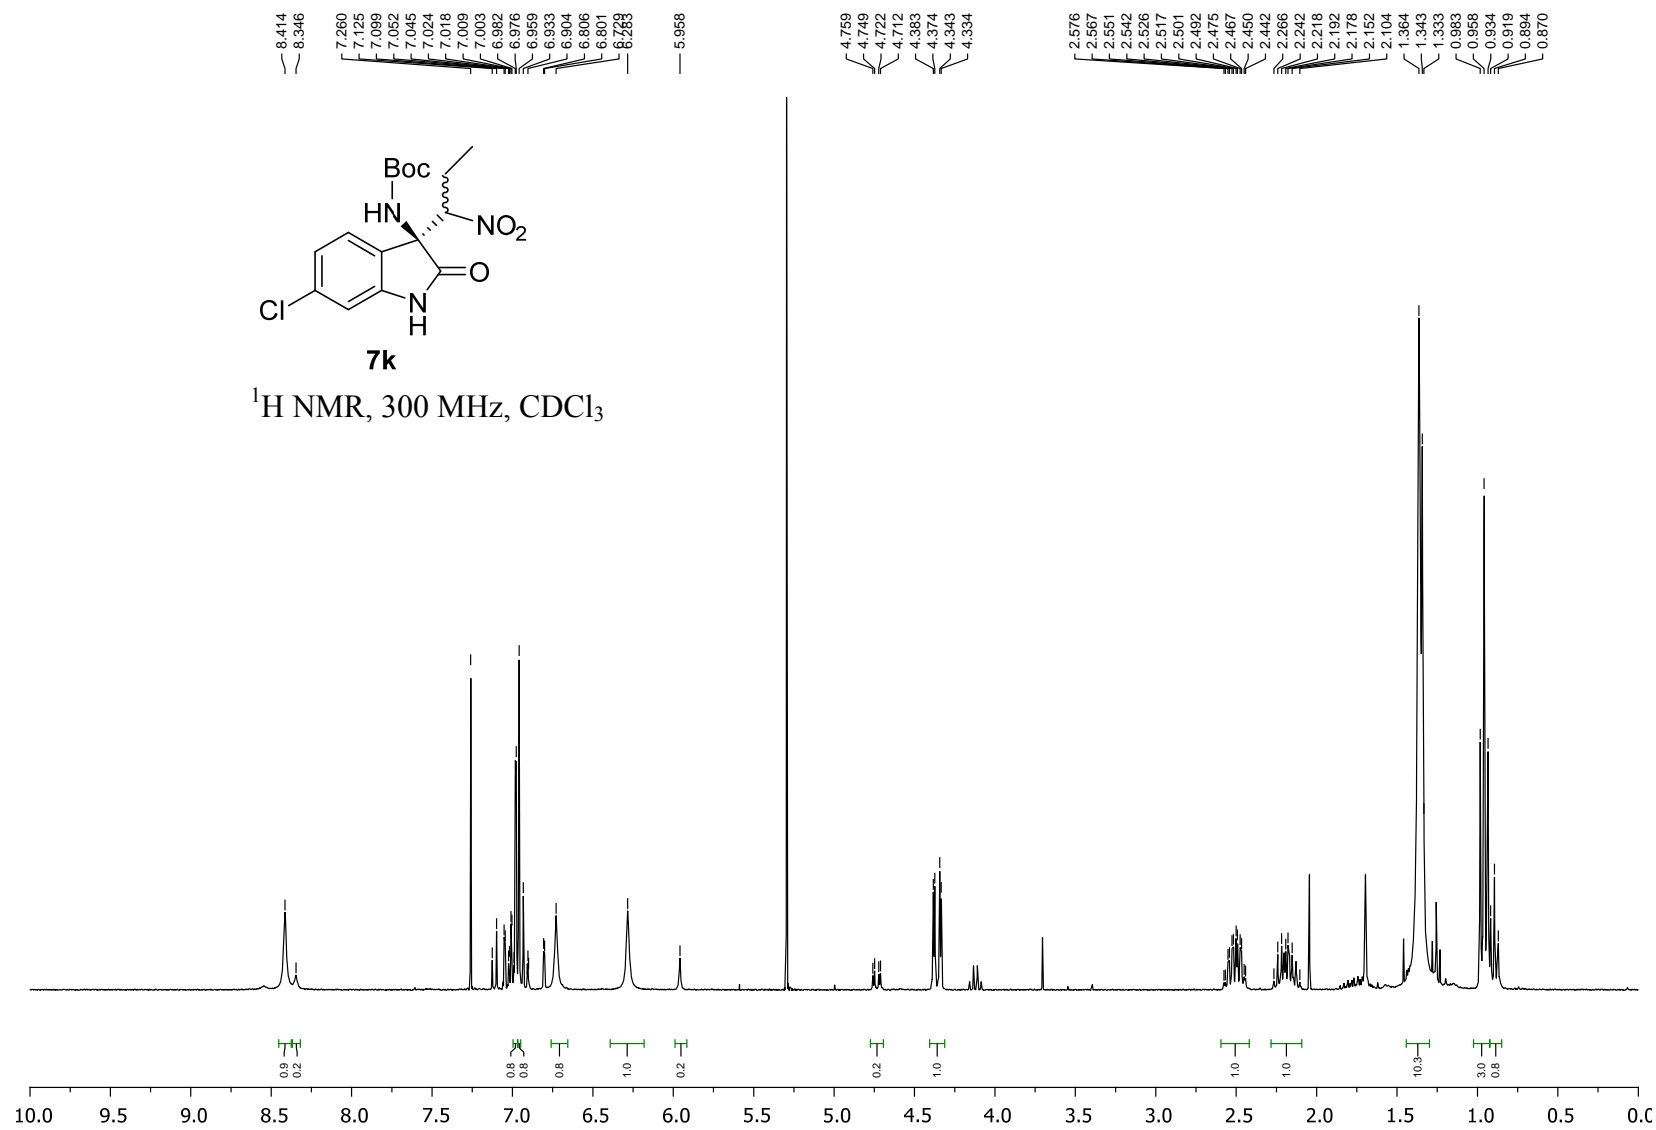

— 173.61  
— 154.17  
— 141.49  
— 135.96

125.64  
123.68  
123.31

— 111.42

— 92.68

81.79  
77.42  
77.00  
76.58

— 61.56

— 28.13

— 20.27

— 10.41

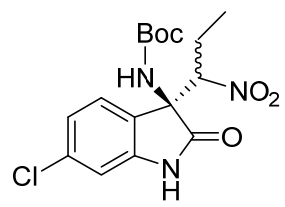

**7k**

<sup>13</sup>C NMR, 75 MHz,

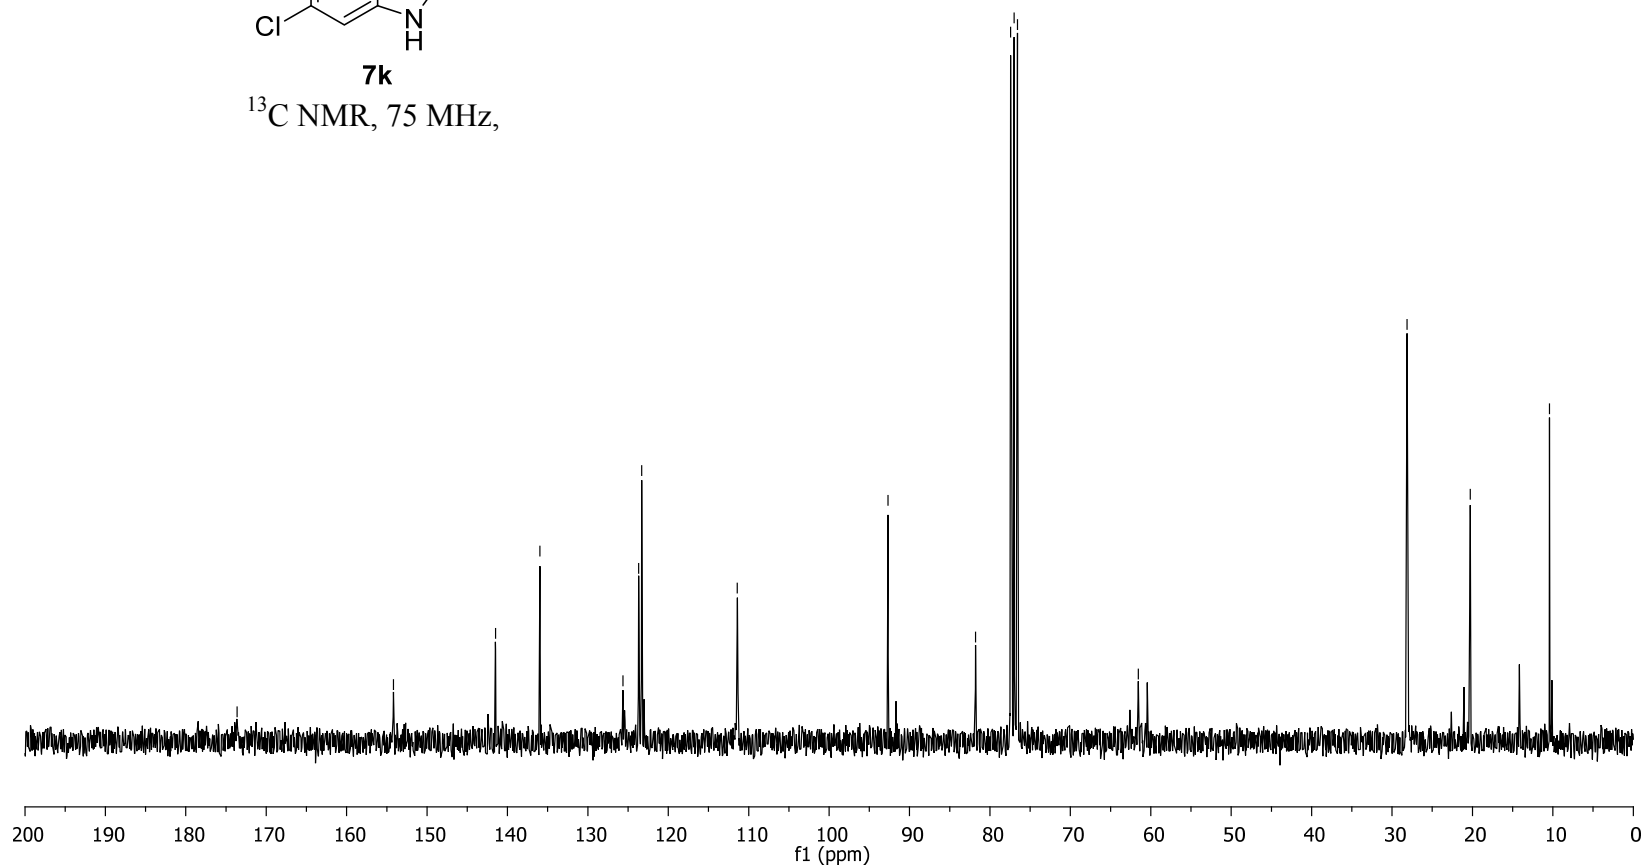

7.742  
7.697  
7.246  
7.230  
7.215  
7.192  
6.974  
6.958  
6.956  
6.945  
6.943  
6.927  
6.151  
6.123

4.918  
4.895  
4.873  
4.850  
4.847  
4.624  
4.601  
4.578

1.735  
1.712  
1.515  
1.389  
1.317  
1.294  
1.248  
1.241

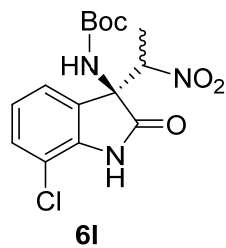

$^1\text{H}$  NMR, 300 MHz,  $\text{CDCl}_3$

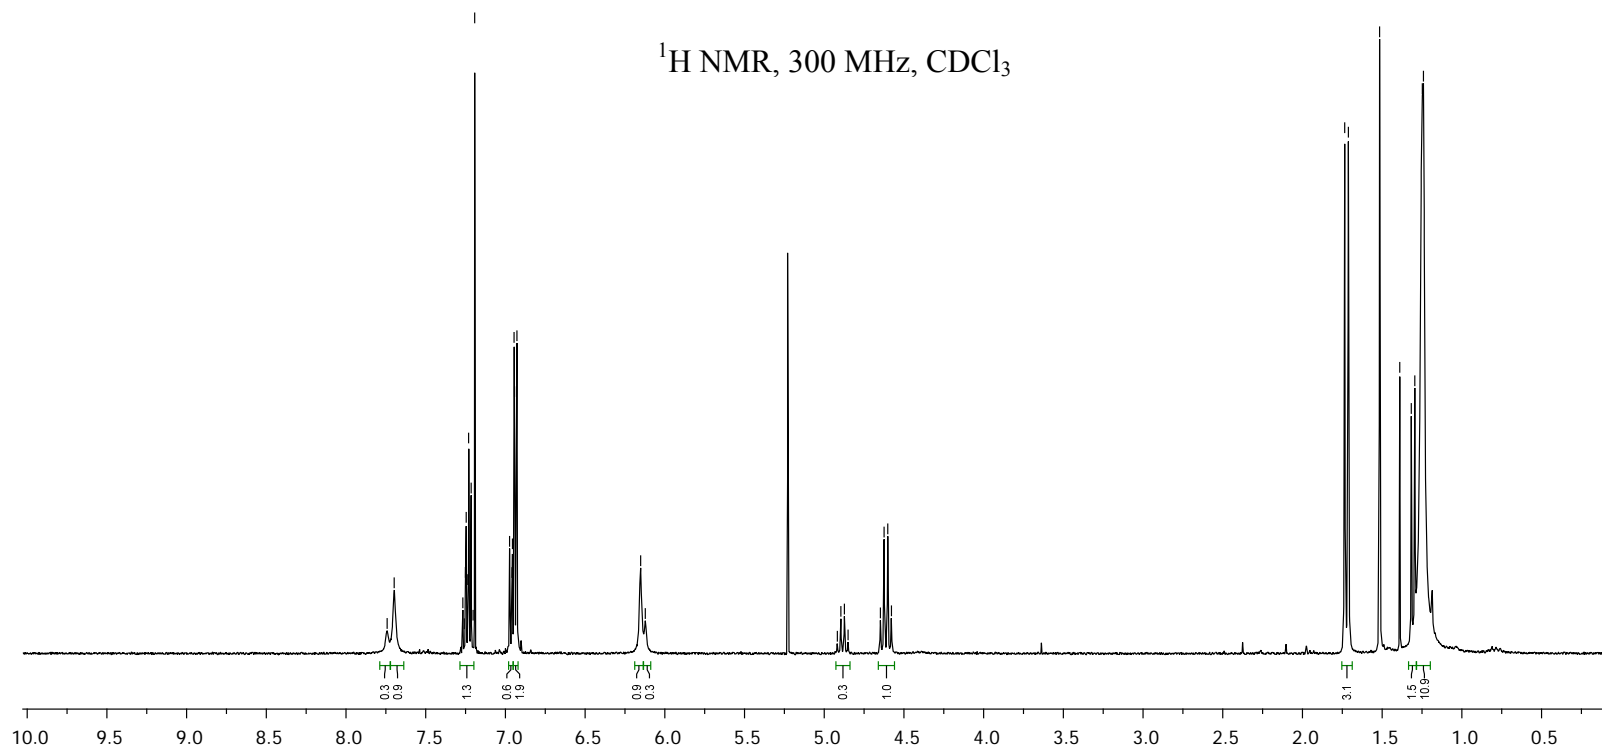

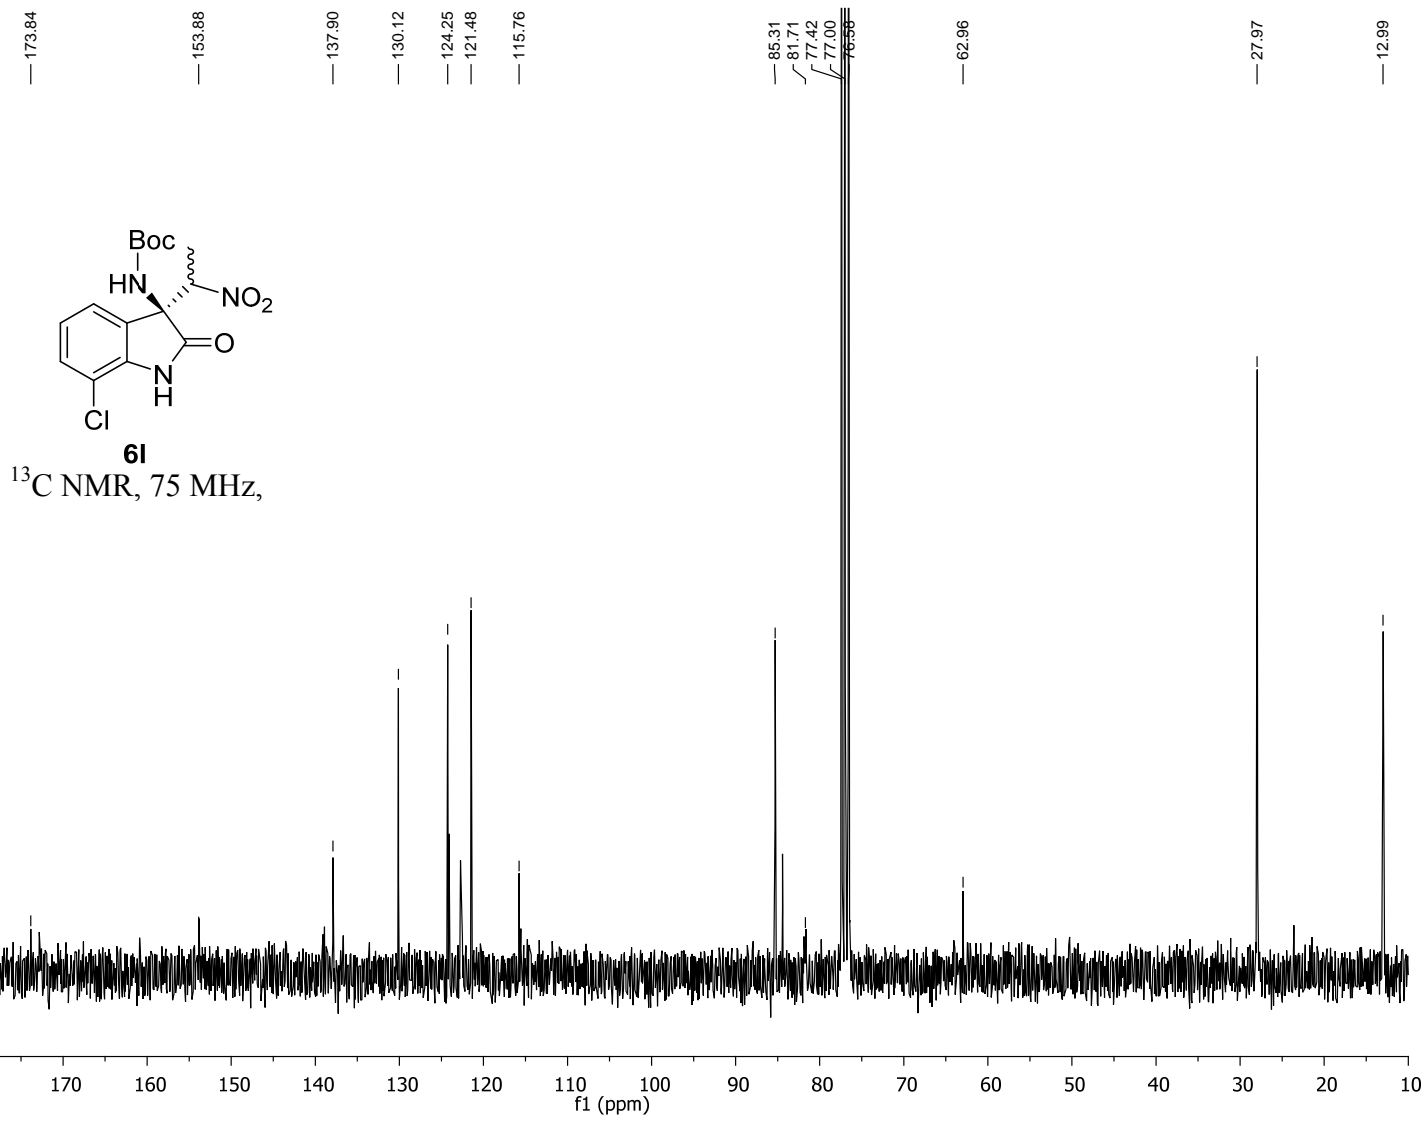

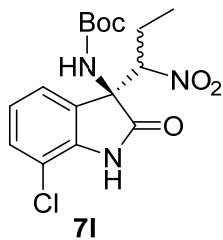

$^1\text{H NMR}$ , 300 MHz,  $\text{CDCl}_3$

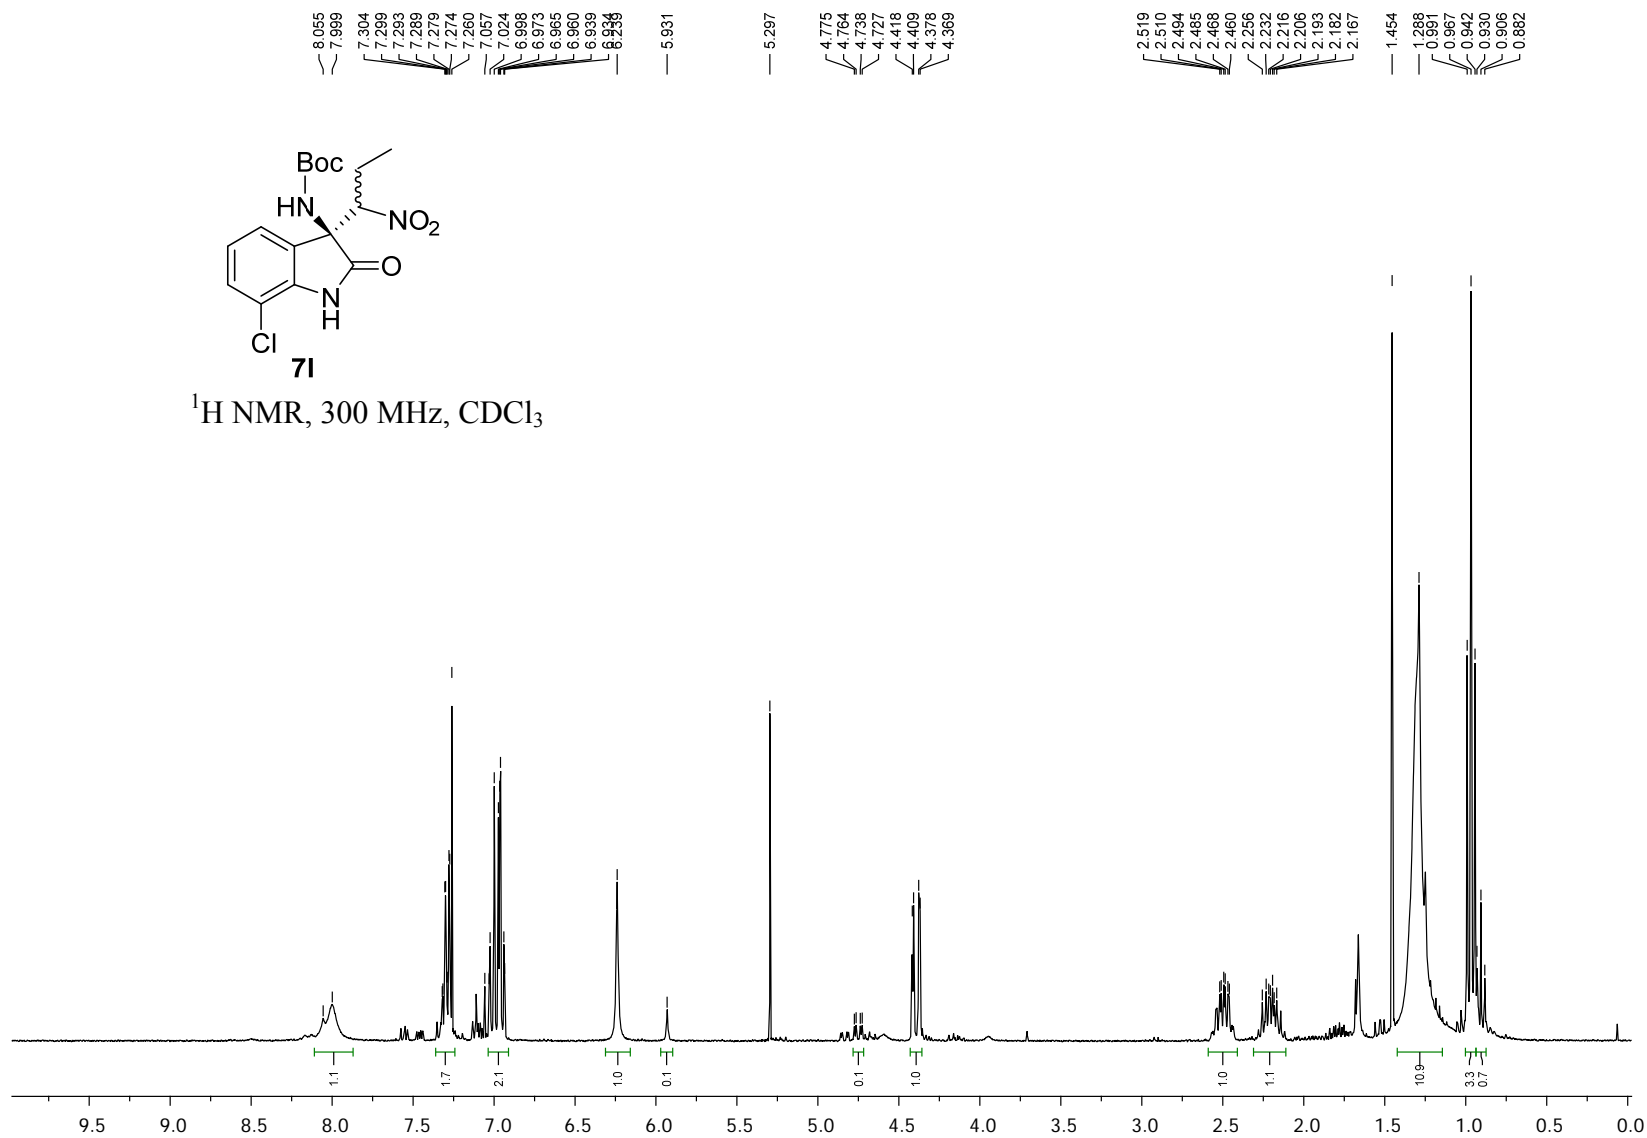



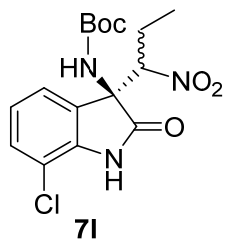

$^1\text{H}$  NMR, 300 MHz,  $\text{CDCl}_3$   
after crystallization

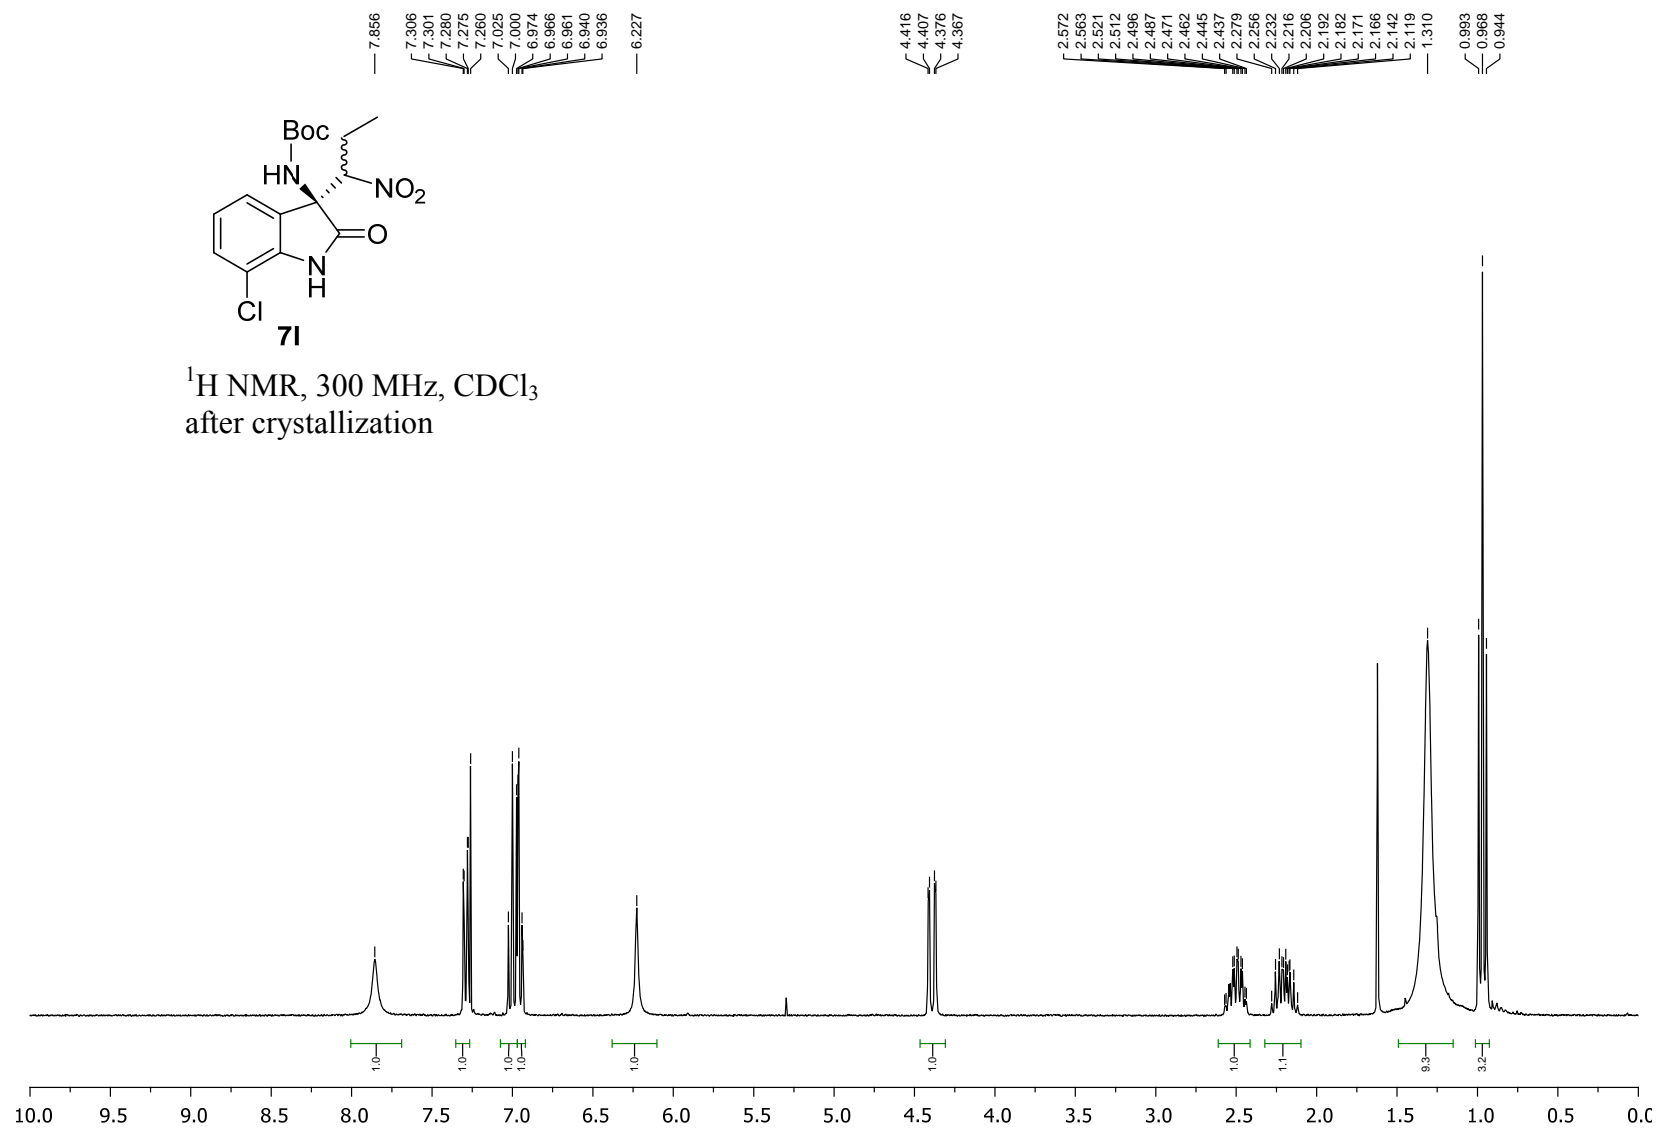

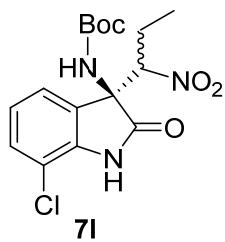

$^{13}\text{C}$  NMR, 75 MHz,  $\text{CDCl}_3$   
after cristallization

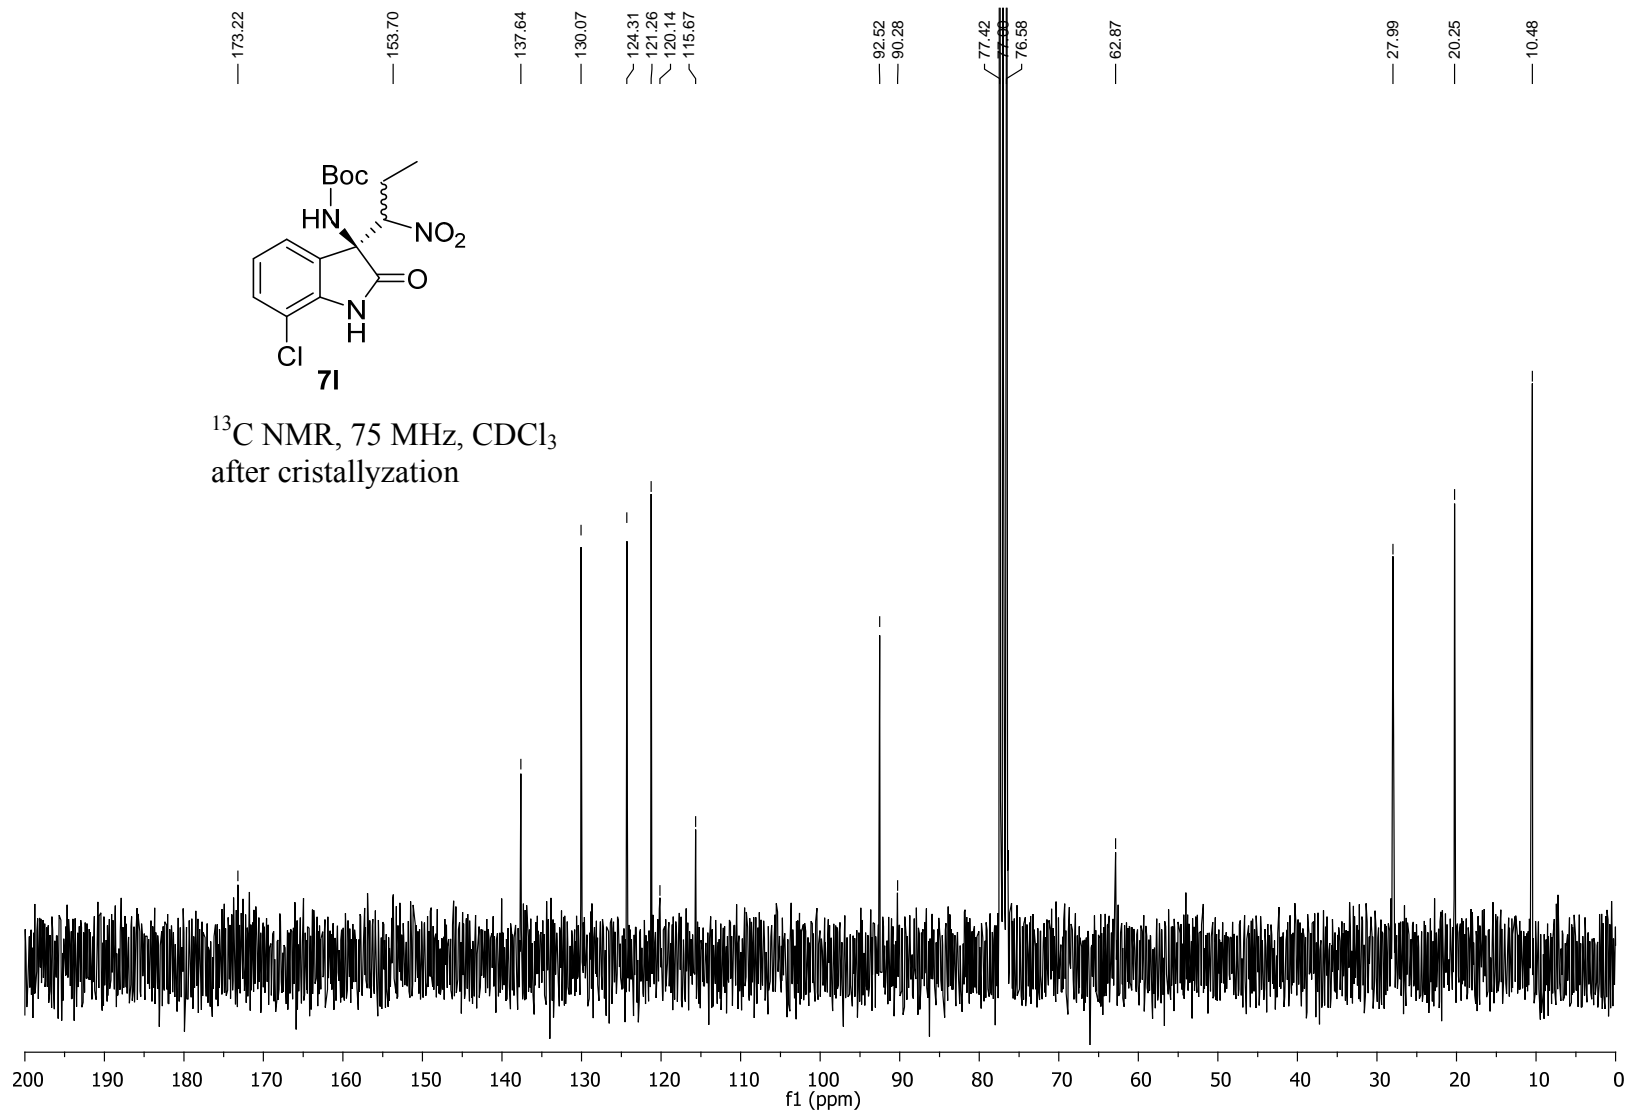

8.686  
7.389  
7.387  
7.385  
7.383  
7.364  
7.362  
7.360  
7.358  
7.321  
7.317  
7.296  
7.291  
7.270  
7.265  
7.079  
7.075  
7.053  
7.050  
7.028  
7.025  
6.959  
6.957  
6.956  
6.954  
6.934  
6.931  
6.890  
6.828

4.913  
4.870  
4.847  
4.804

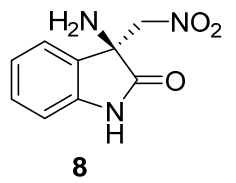

<sup>1</sup>H NMR, 300 MHz, CD<sub>3</sub>CN

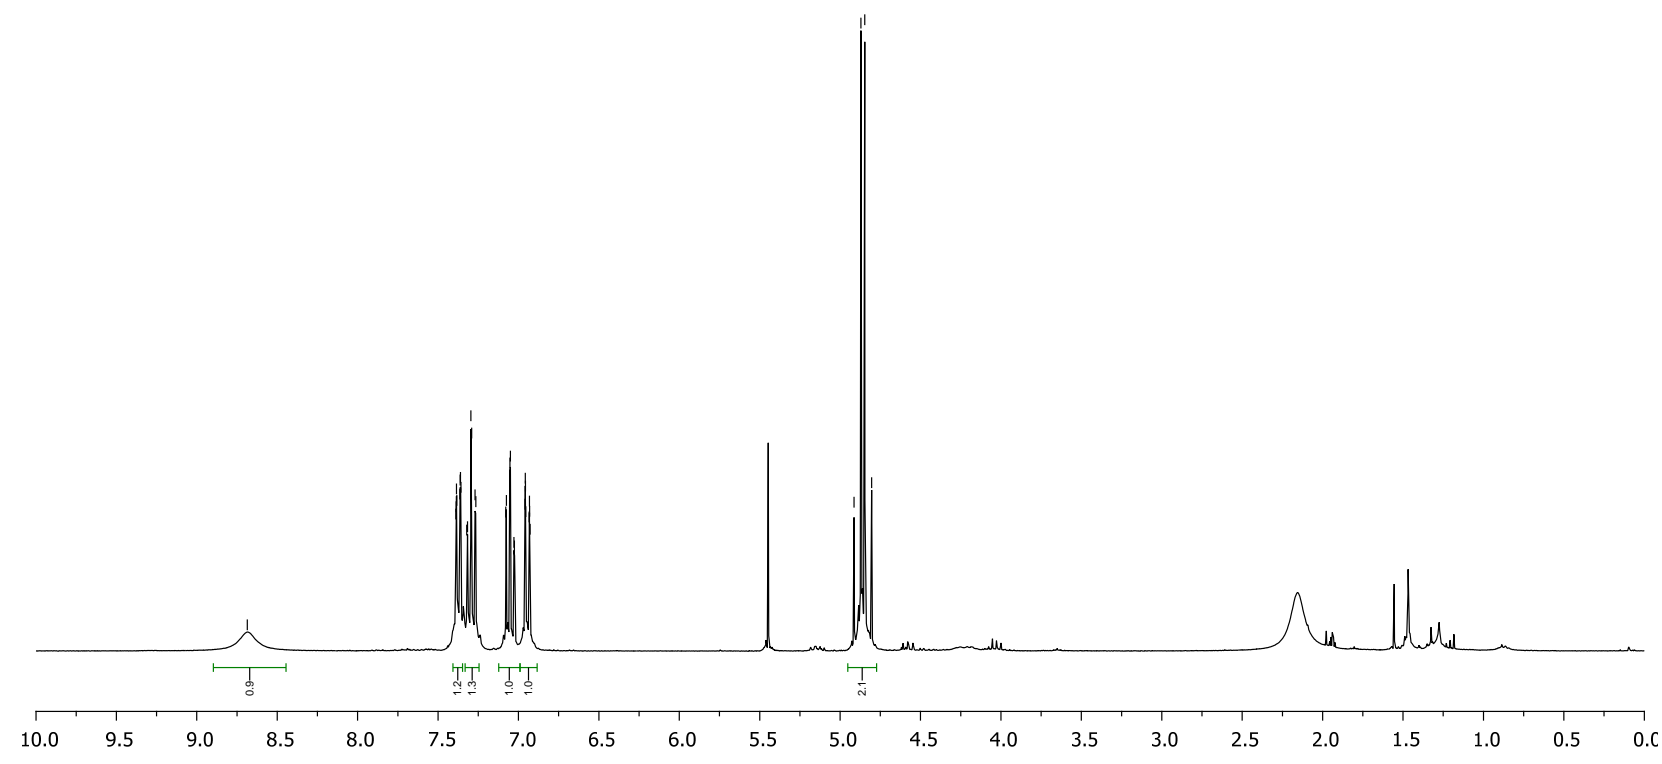

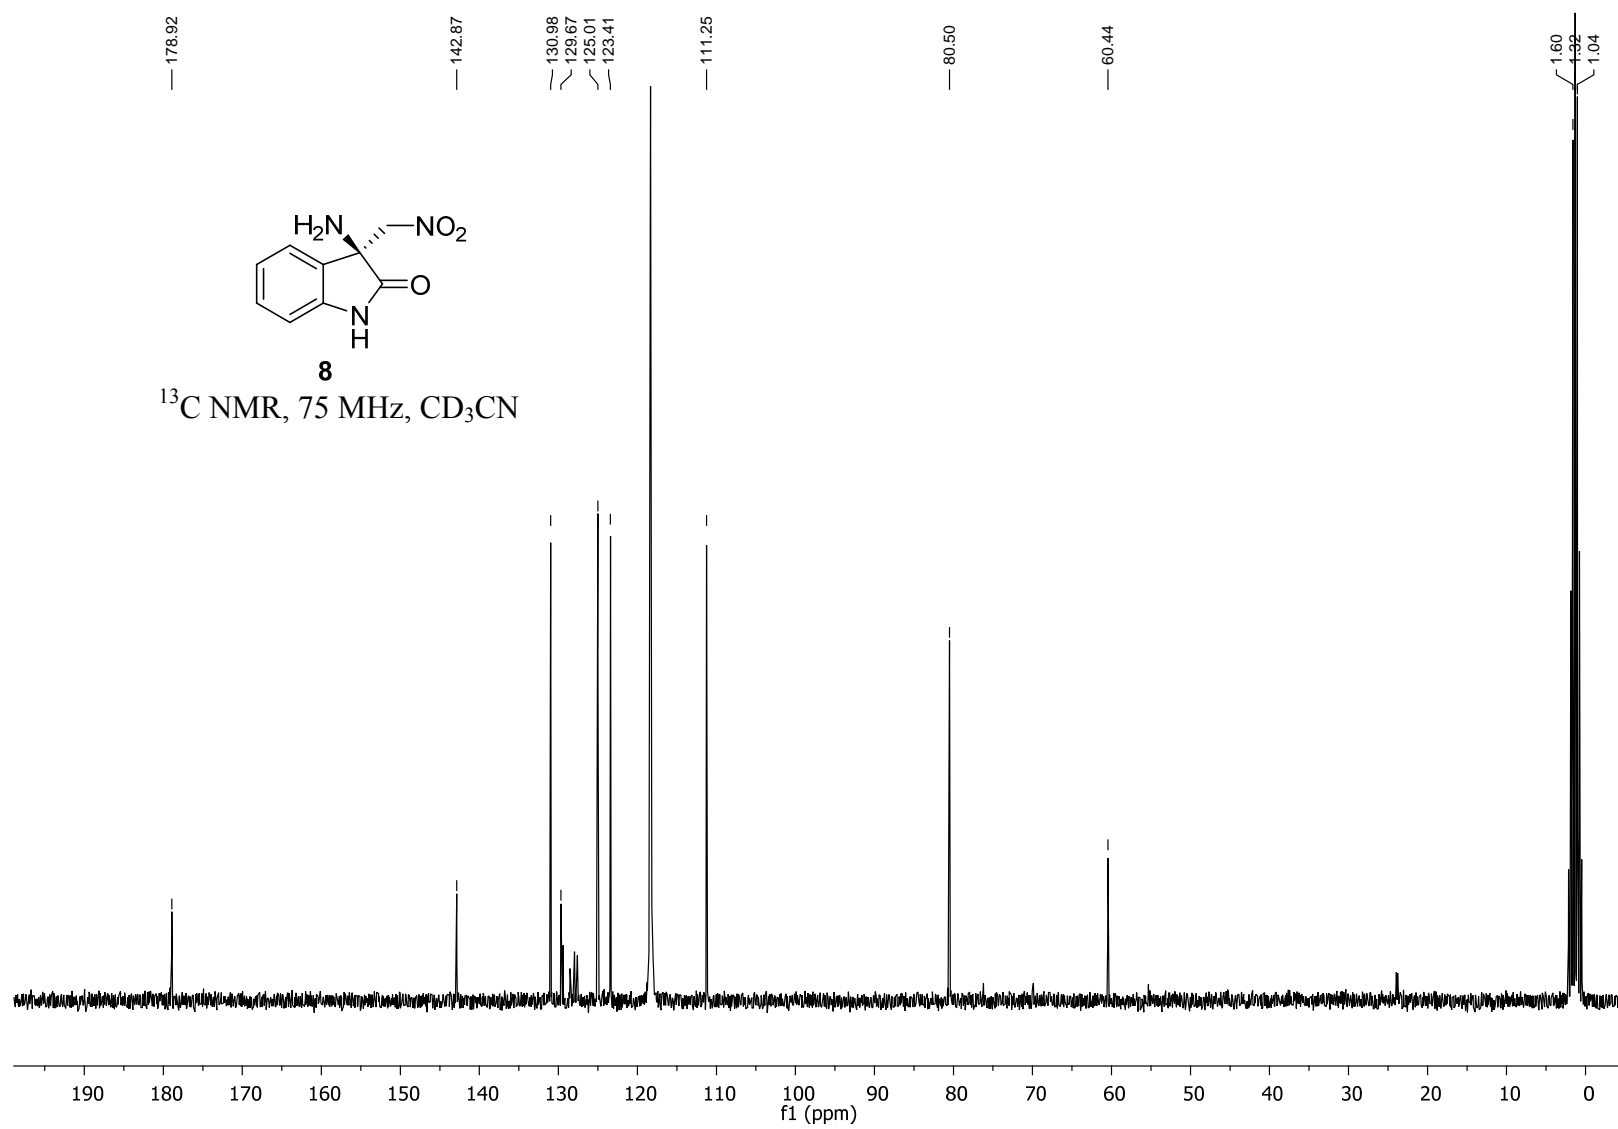

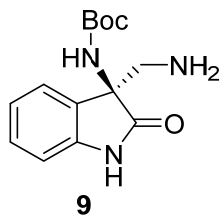

$^1\text{H}$  NMR, 300 MHz,  $\text{CD}_3\text{OD}$

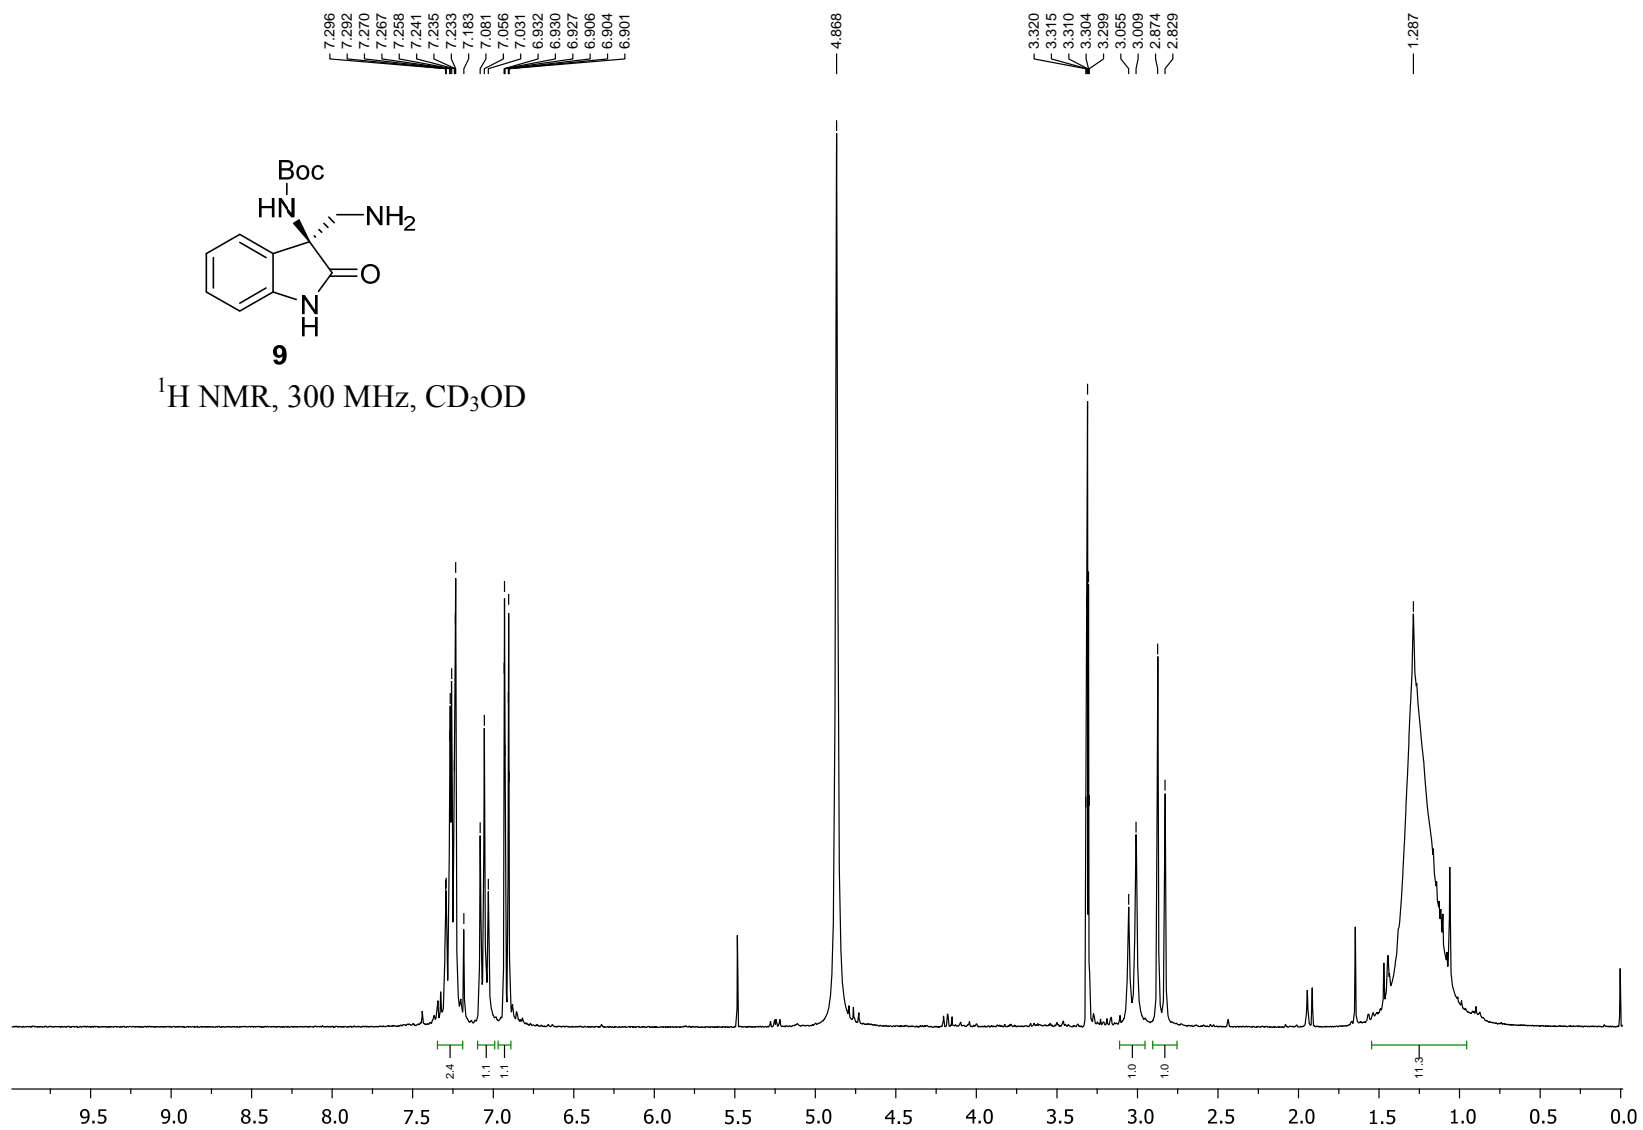

180.05  
156.46  
142.83  
130.17  
127.79  
123.70  
123.62  
111.33  
81.28  
63.73  
49.85  
49.57  
49.28  
49.00  
48.72  
48.43  
48.15  
48.06  
28.38

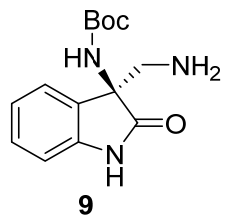

<sup>13</sup>C NMR, 75 MHz, CD<sub>3</sub>OD

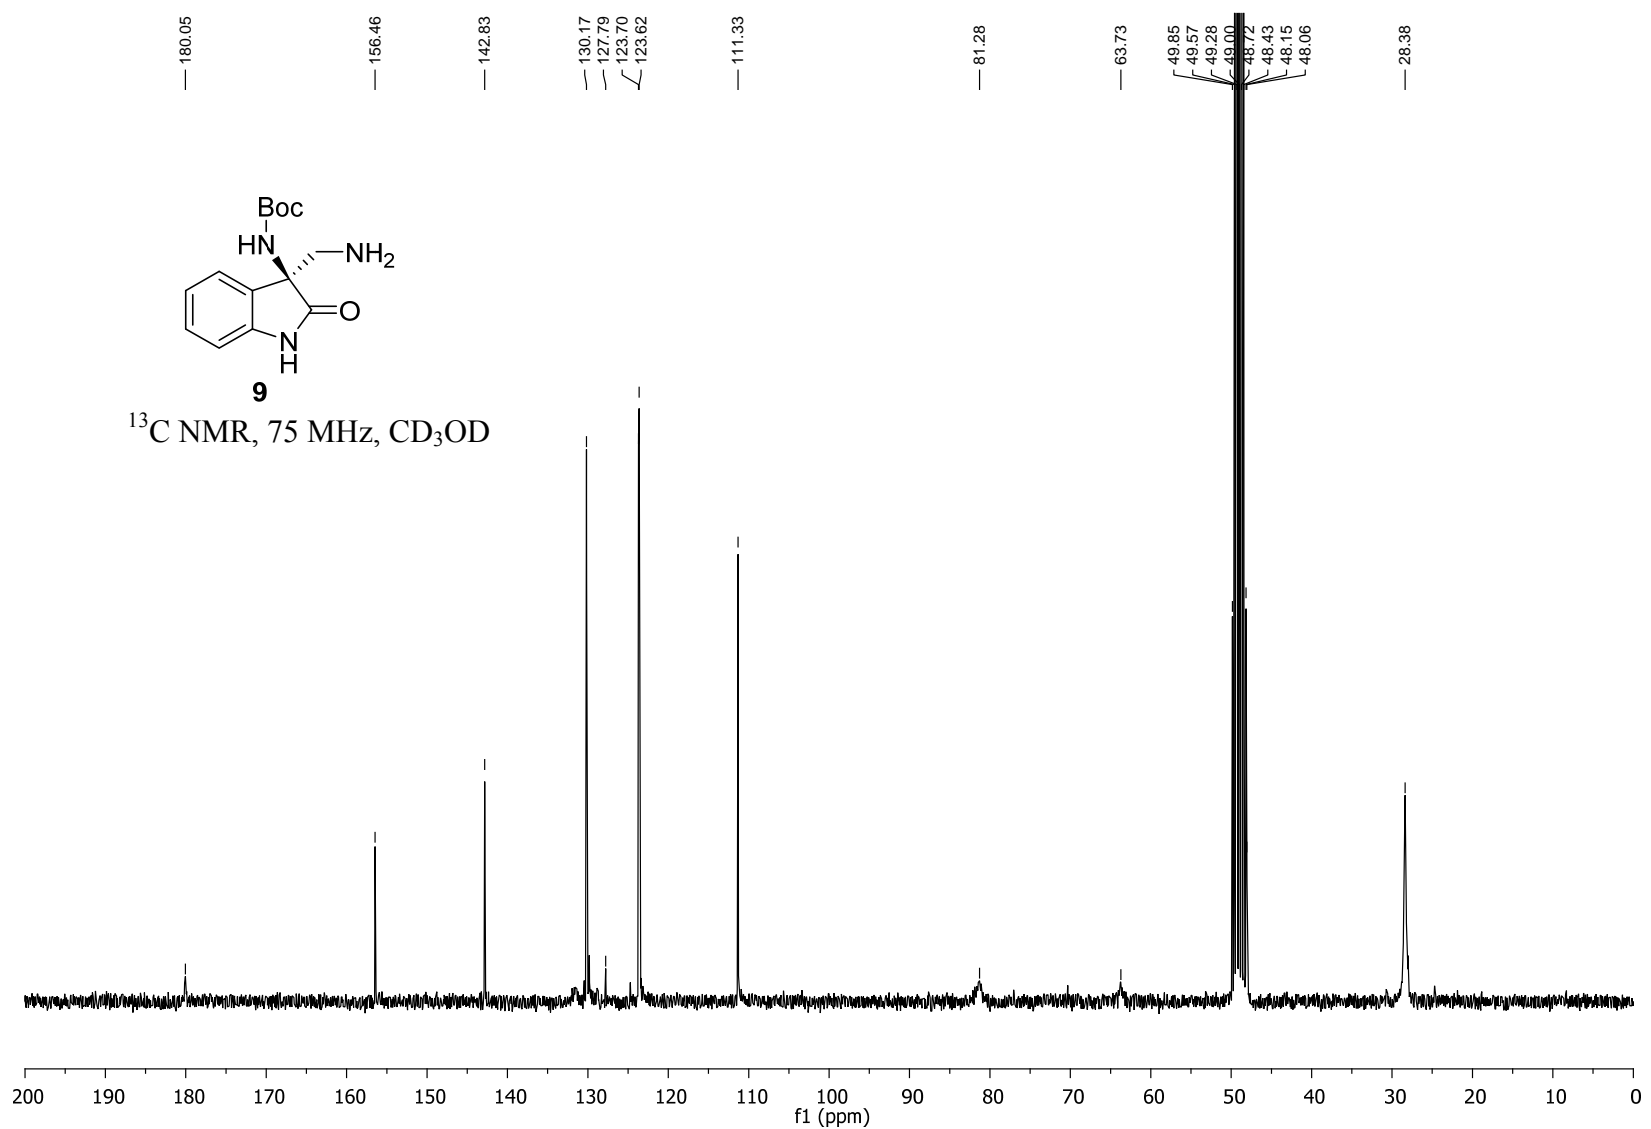

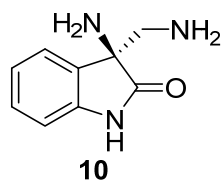

$^1\text{H}$  NMR, 300 MHz,  $\text{CD}_3\text{OD}$

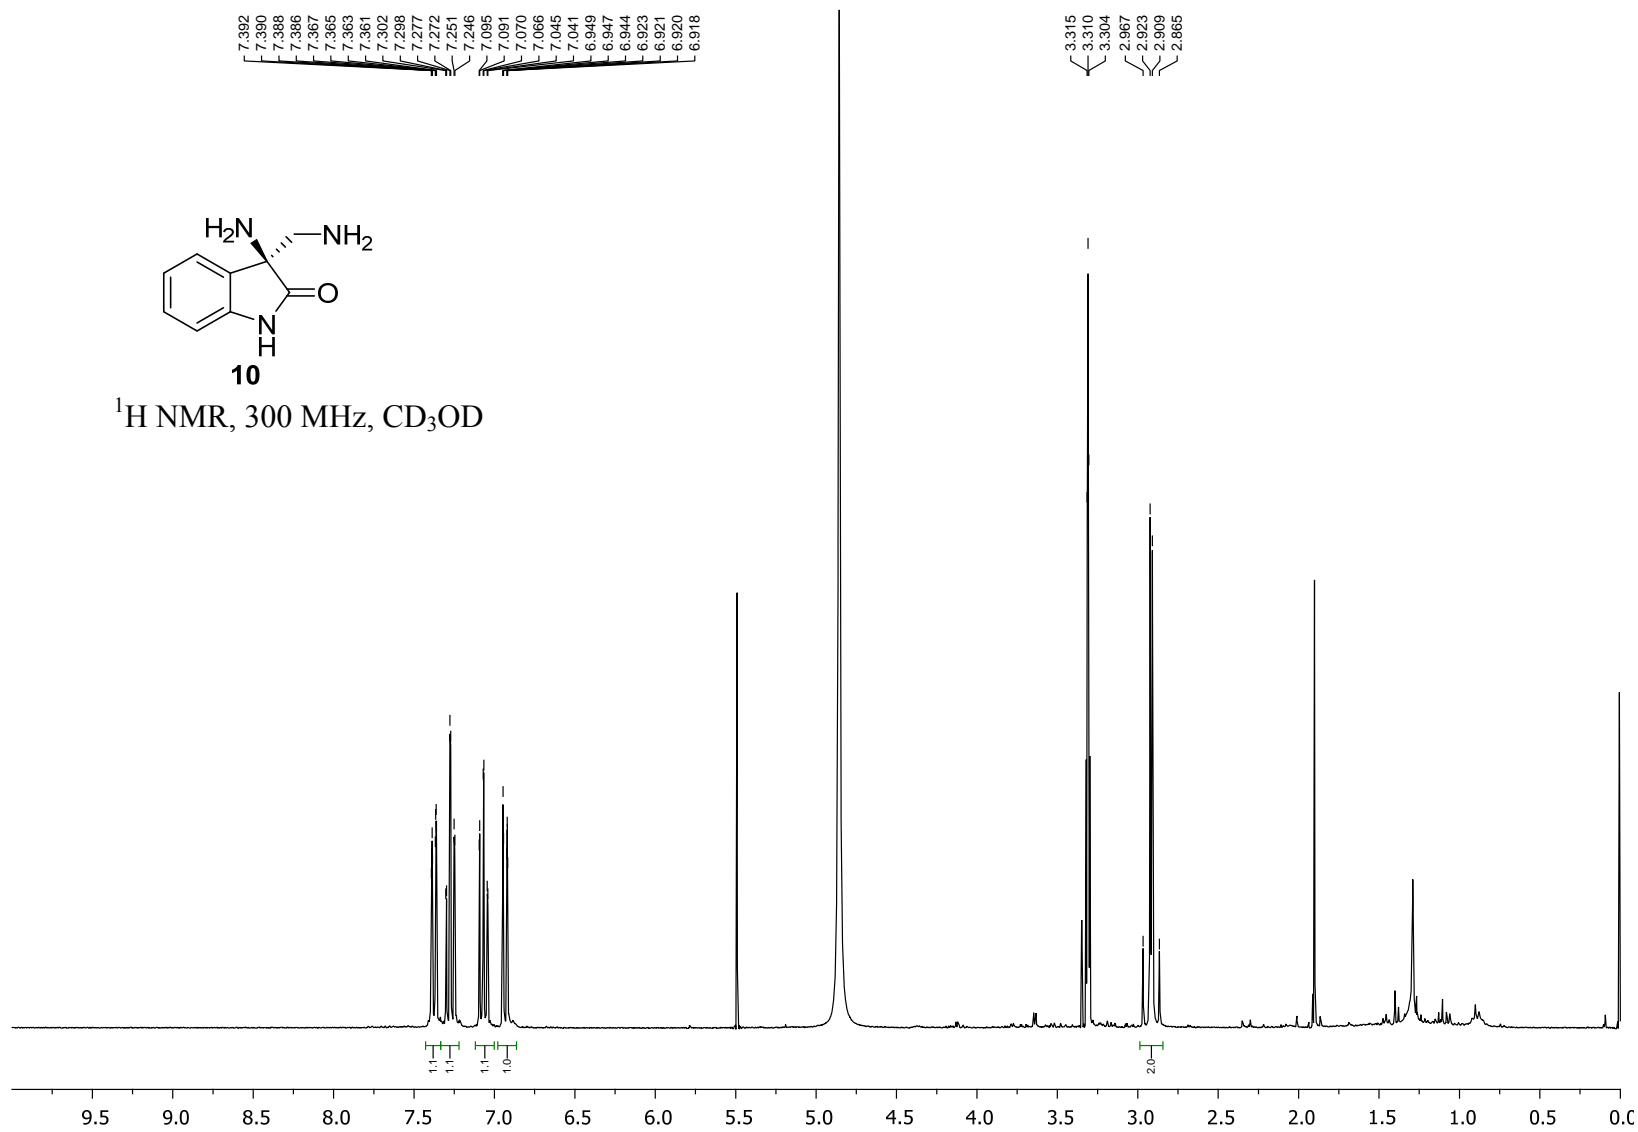

— 182.78

— 143.07

— 132.19

— 130.41

— 124.92

— 123.71

— 111.34

— 62.88

— 49.85

— 49.57

— 49.28

— 48.72

— 48.43

— 48.15

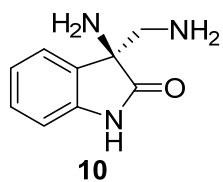

<sup>13</sup>C NMR, 75 MHz, CD<sub>3</sub>OD

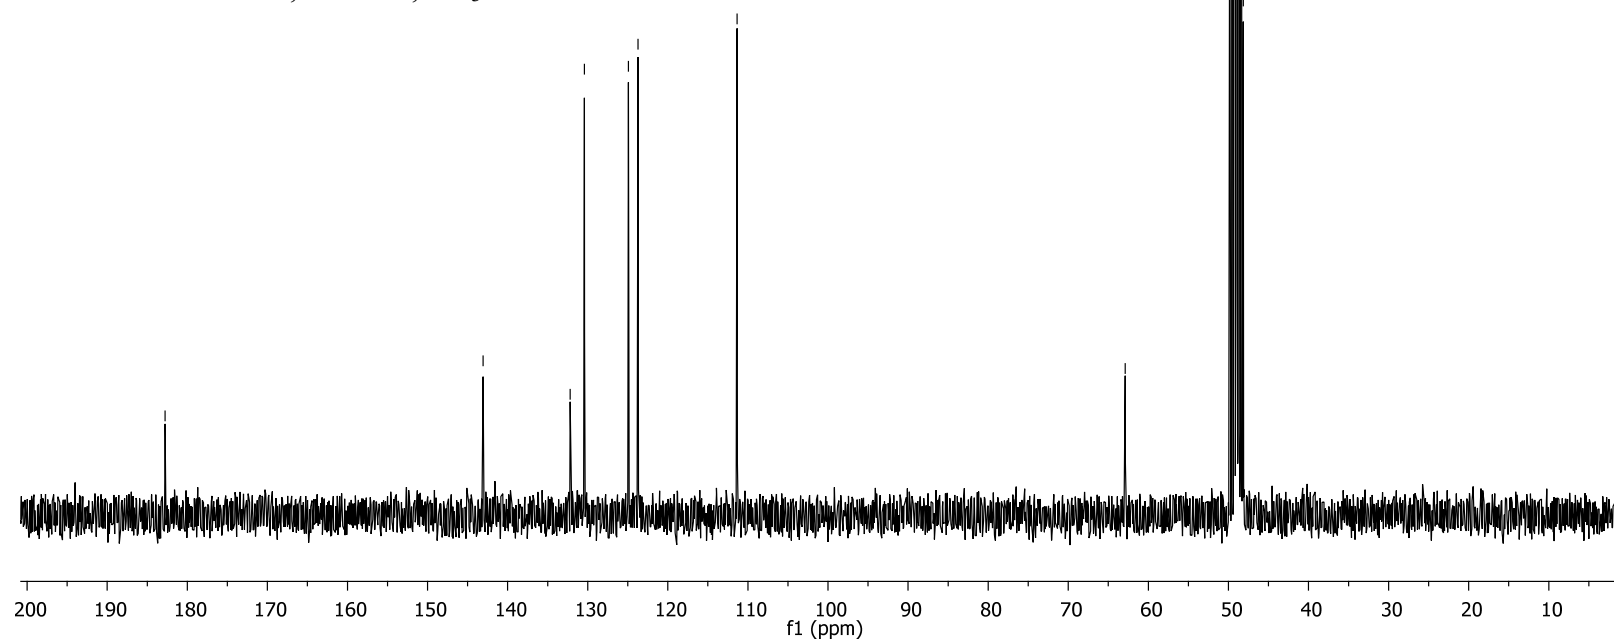



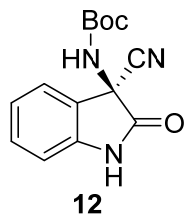

$^1\text{H}$  NMR, 300 MHz,  $\text{CD}_3\text{OD}$

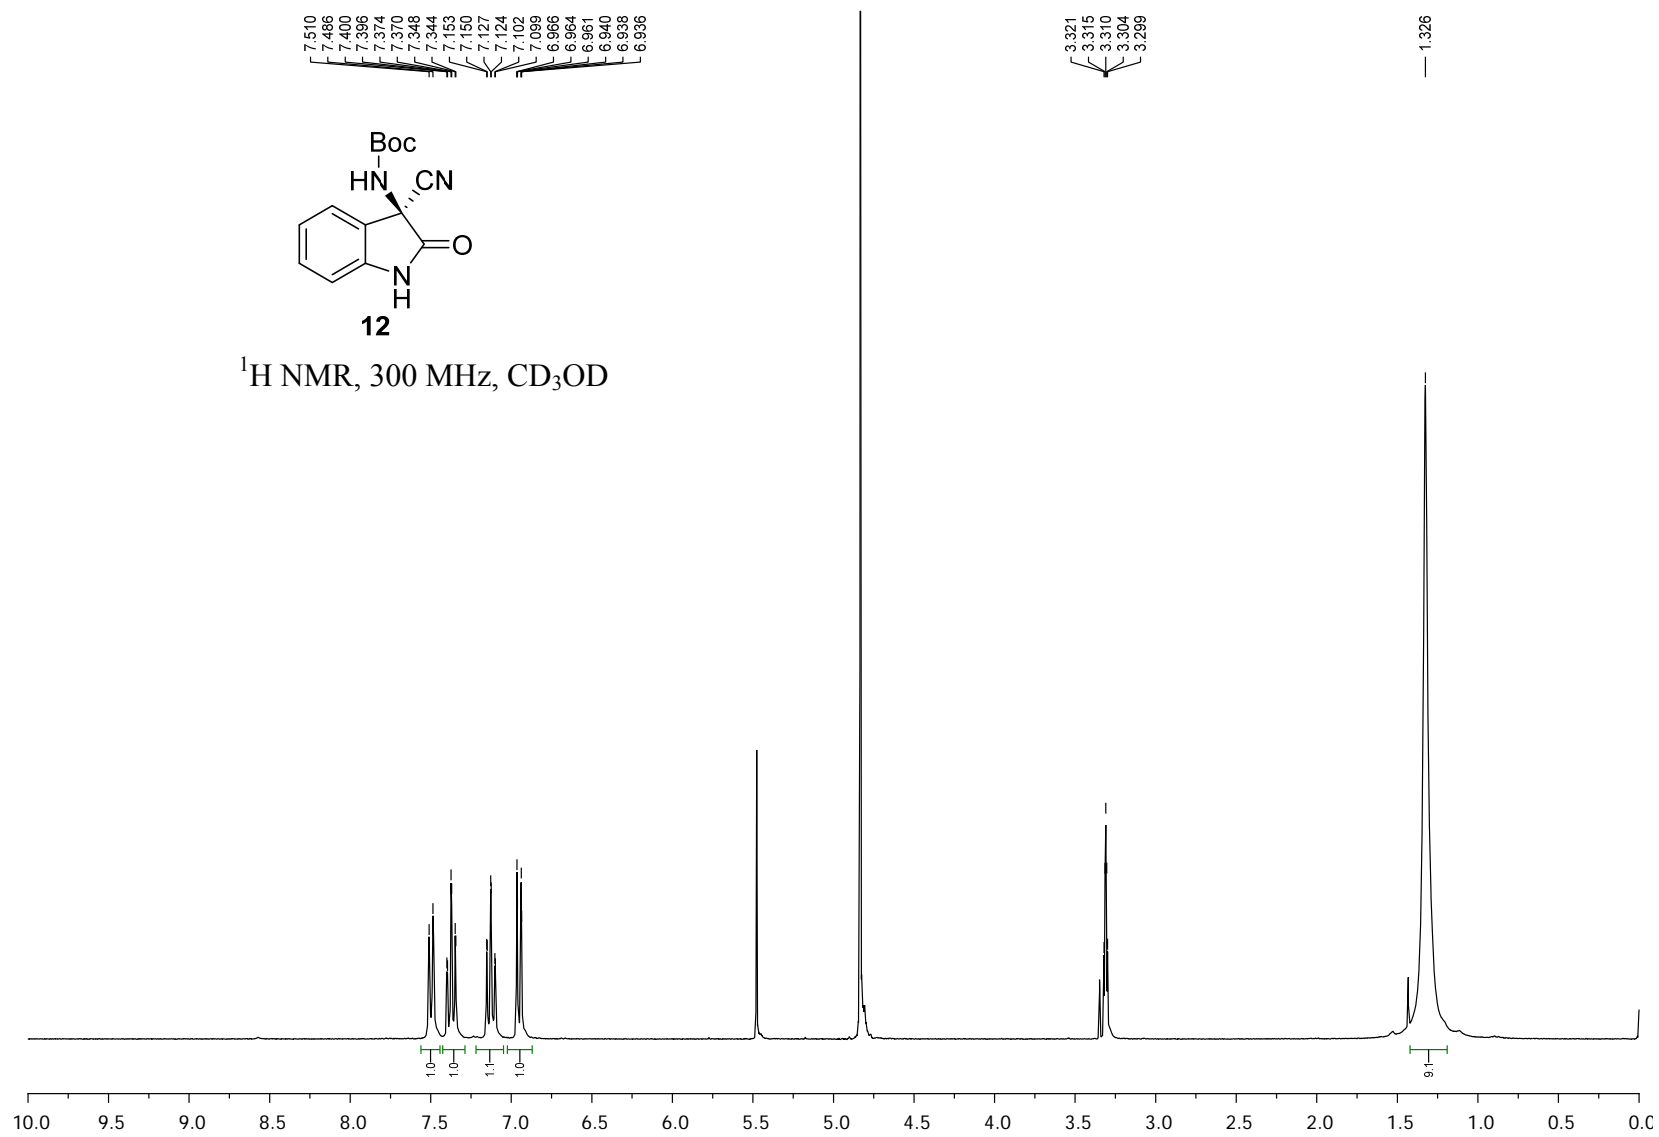

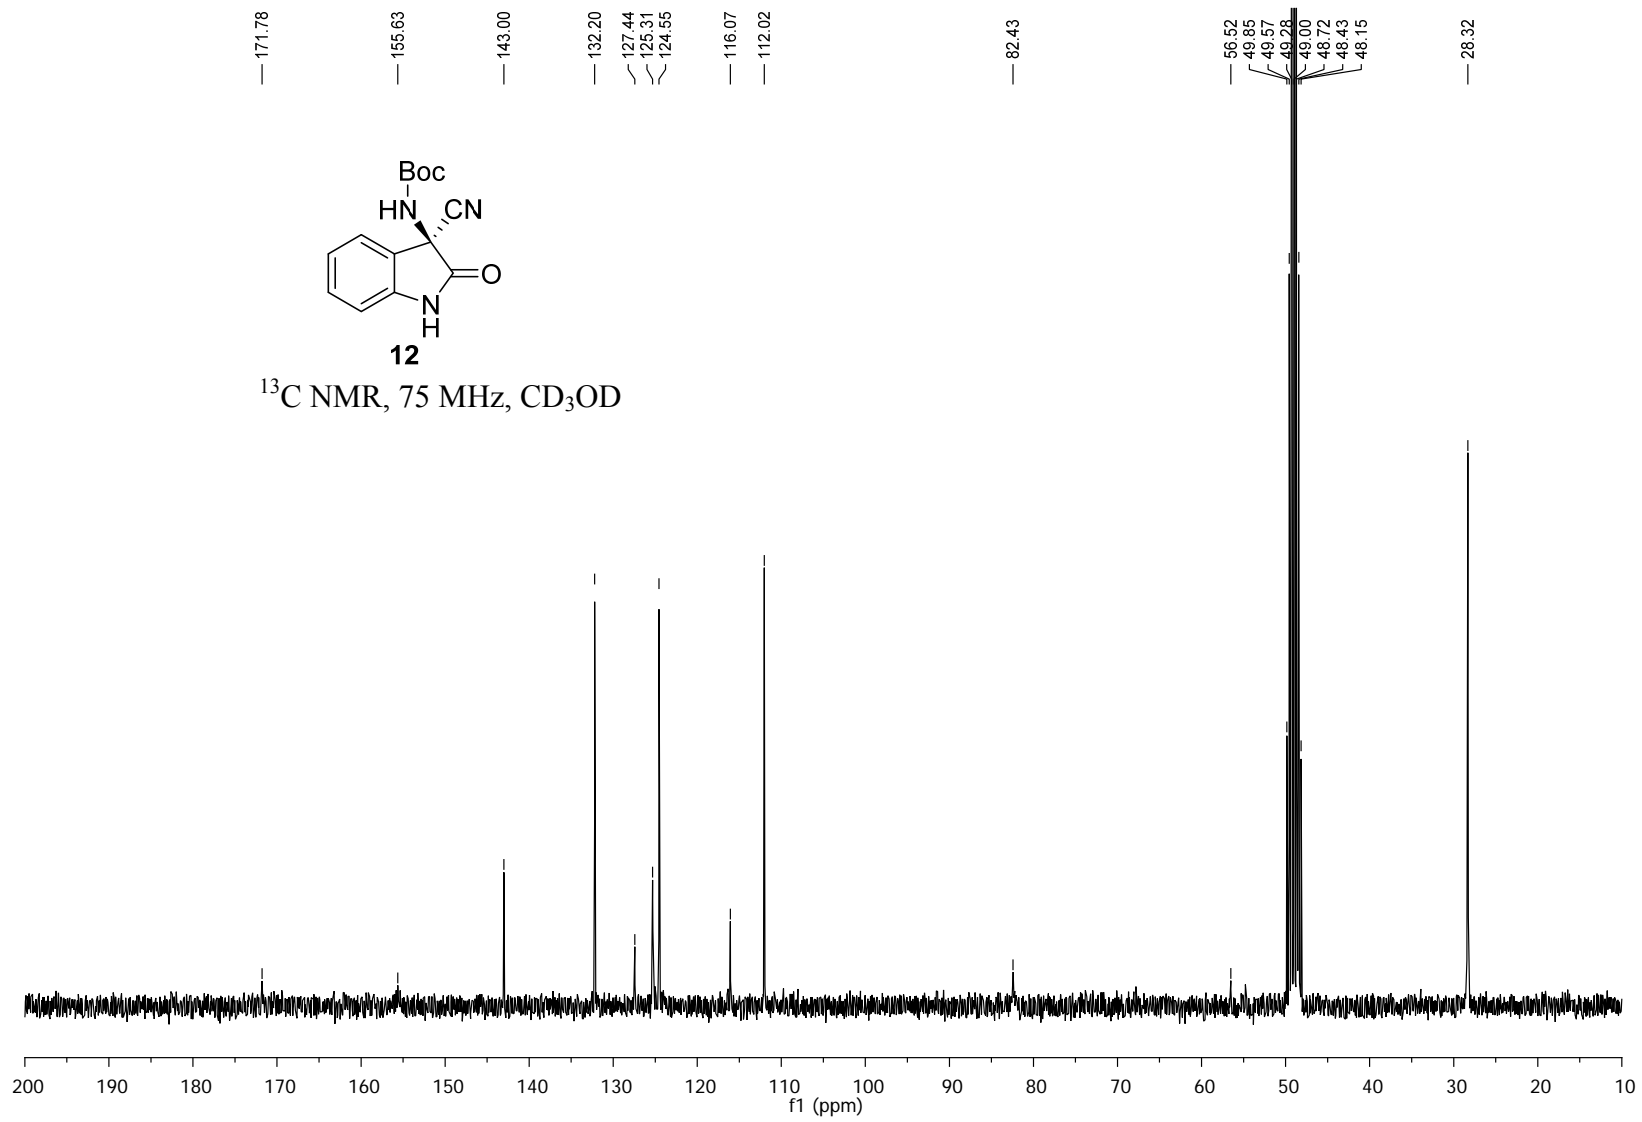

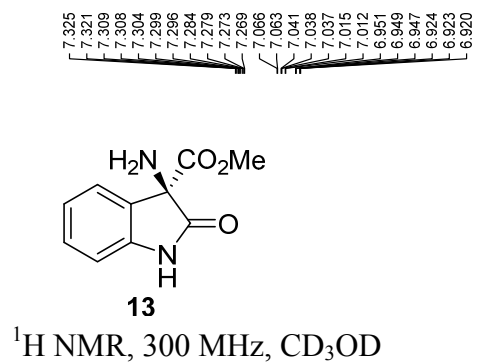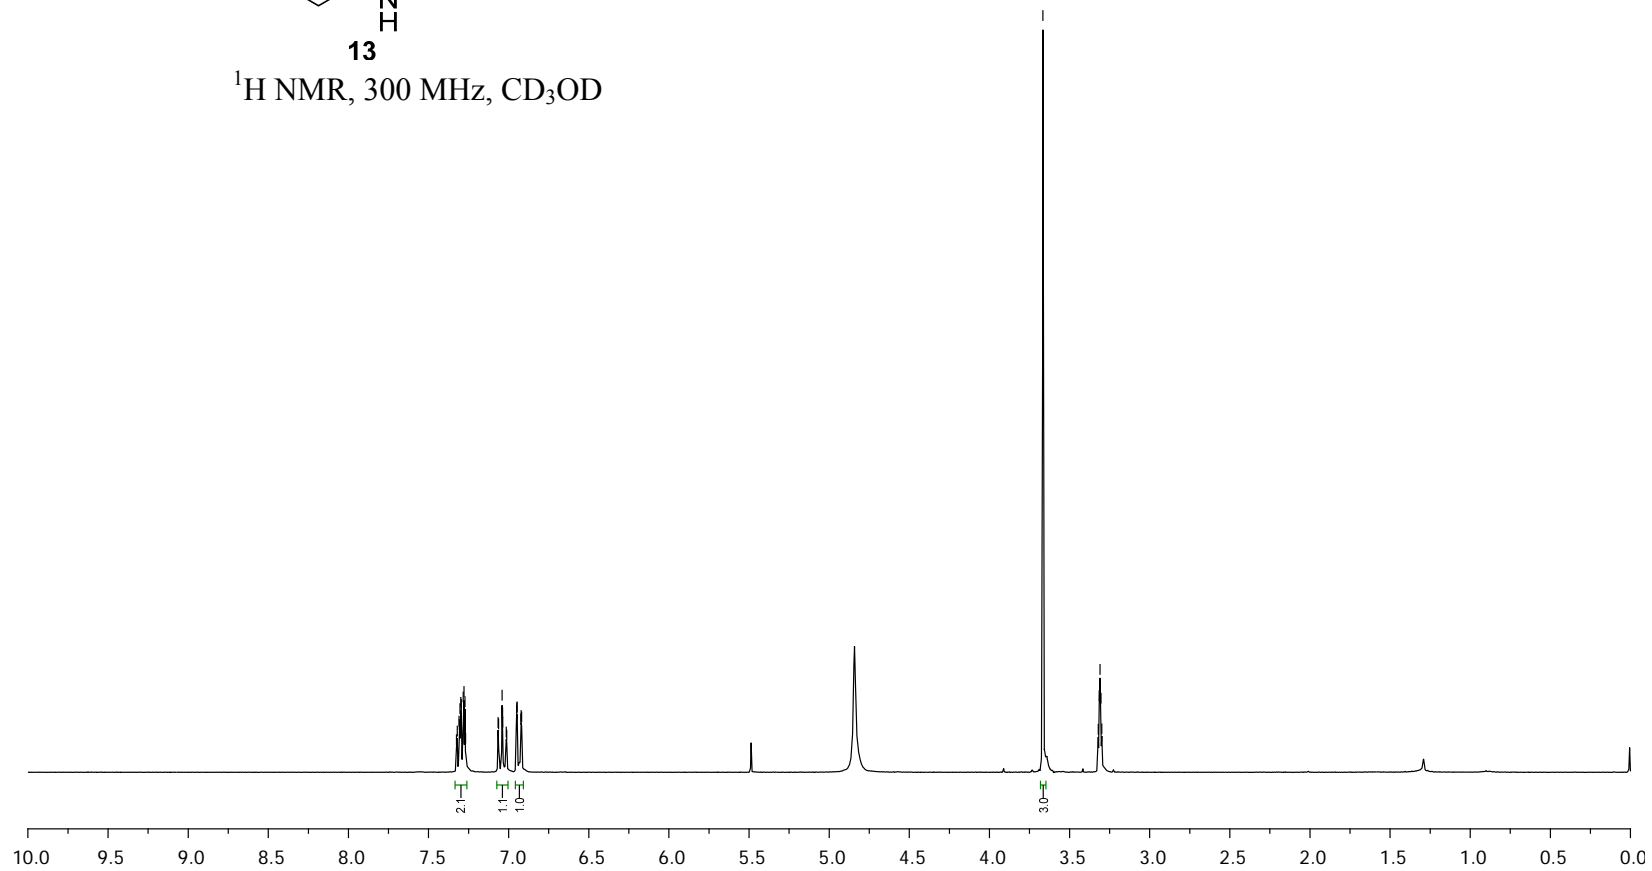

— 178.25

— 171.72

— 143.92

— 131.16

— 130.79

— 124.77

— 123.88

— 111.53

— 66.92

— 53.58

— 49.85

— 49.57

— 49.28

— 49.00

— 48.72

— 48.43

— 48.15

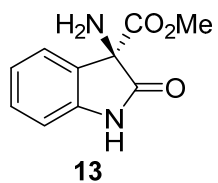

$^{13}\text{C}$  NMR, 75 MHz,  $\text{CD}_3\text{OD}$

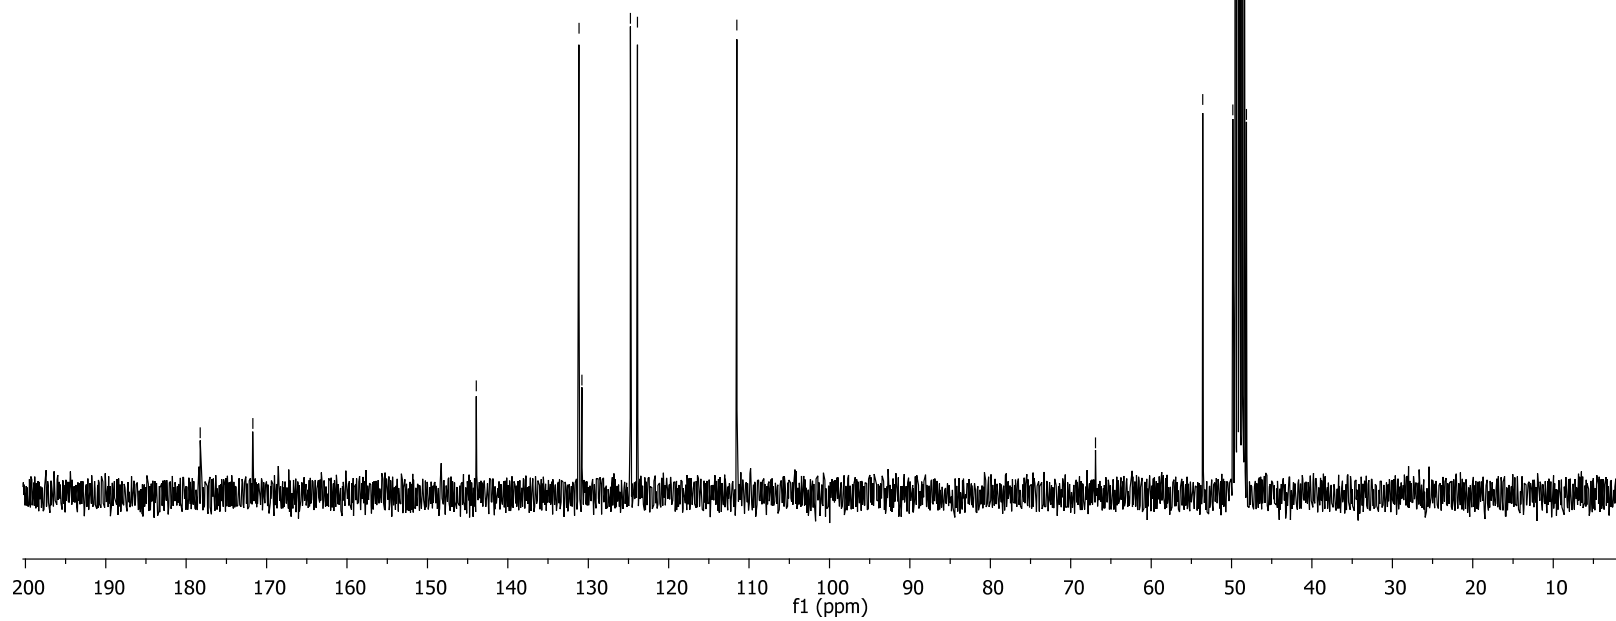

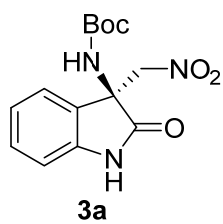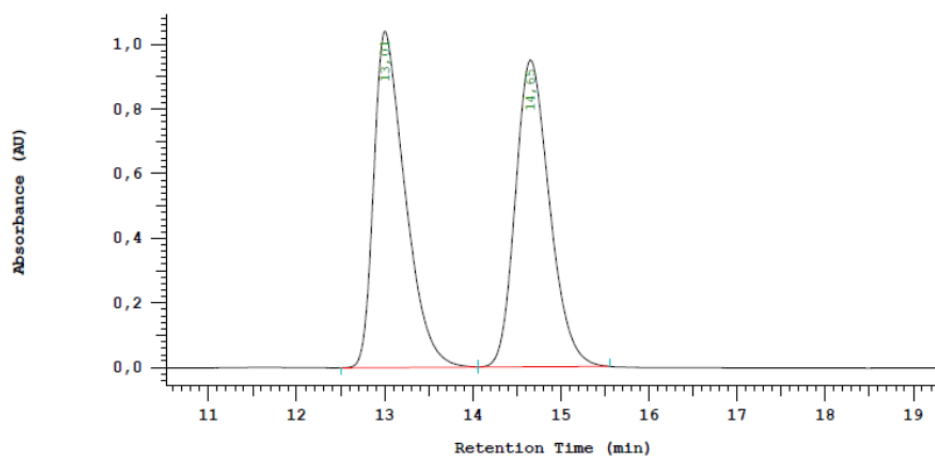

| No. | RT    | Area     | Area %  |
|-----|-------|----------|---------|
| 1   | 13,01 | 12867494 | 50,162  |
| 2   | 14,65 | 12784535 | 49,838  |
|     |       | 25652029 | 100,000 |

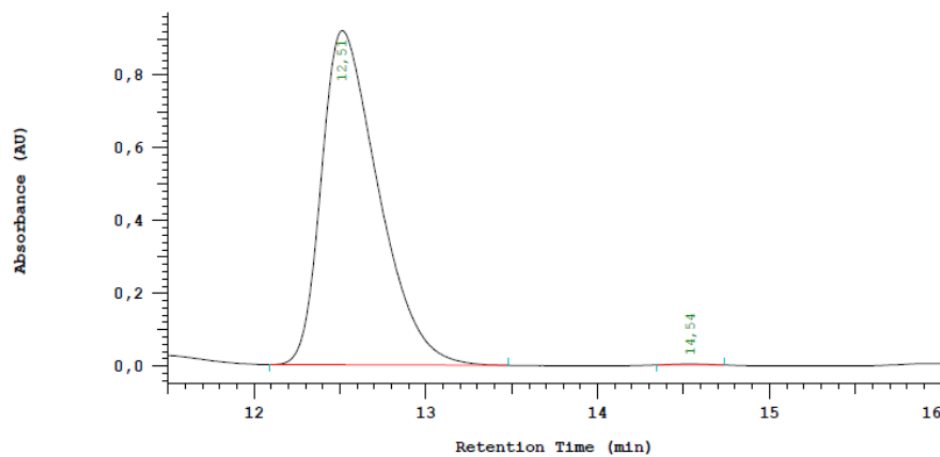

| No. | RT    | Area     | Area %  |
|-----|-------|----------|---------|
| 1   | 12,51 | 10581300 | 99,819  |
| 2   | 14,54 | 19183    | 0,181   |
|     |       | 10600483 | 100,000 |

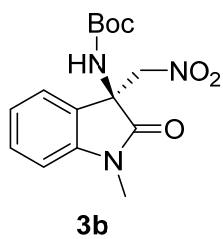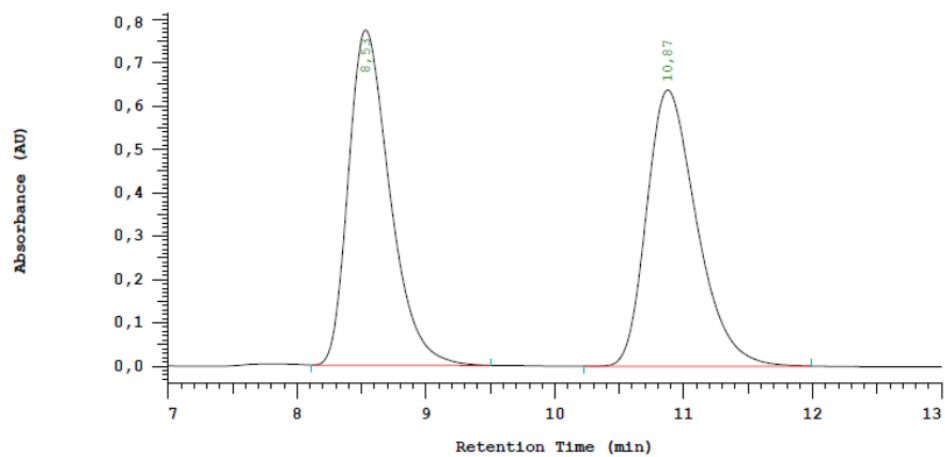

| No. | RT    | Area     | Area %  |
|-----|-------|----------|---------|
| 1   | 8,53  | 8619237  | 50,076  |
| 2   | 10,87 | 8593203  | 49,924  |
|     |       | 17212440 | 100,000 |

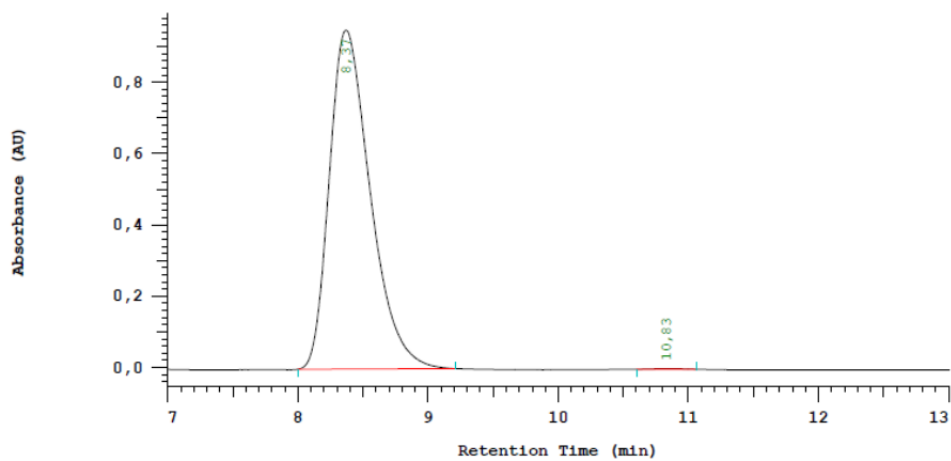

| No. | RT    | Area     | Area %  |
|-----|-------|----------|---------|
| 1   | 8,37  | 10379298 | 99,895  |
| 2   | 10,83 | 10859    | 0,105   |
|     |       | 10390157 | 100,000 |

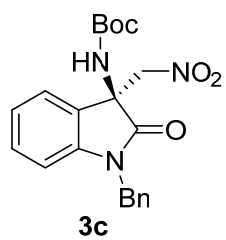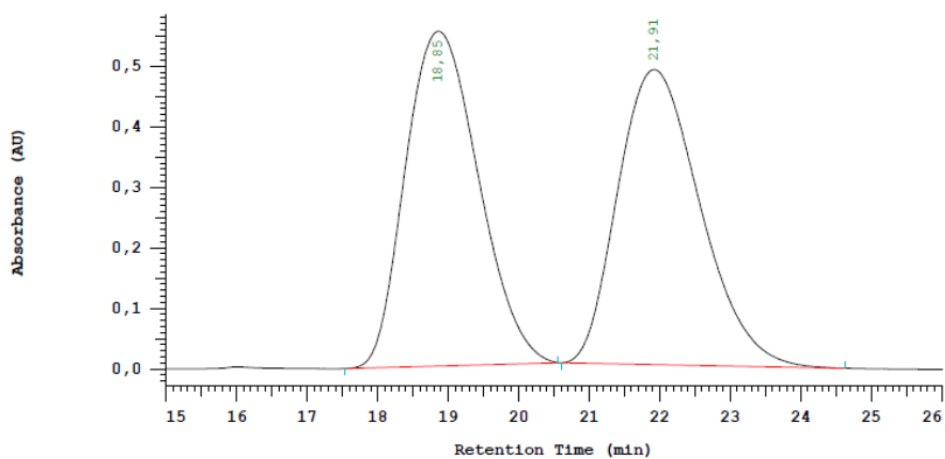

| No. | RT    | Area     | Area %  |
|-----|-------|----------|---------|
| 1   | 18,85 | 19903152 | 50,169  |
| 2   | 21,91 | 19769376 | 49,831  |
|     |       | 39672528 | 100,000 |

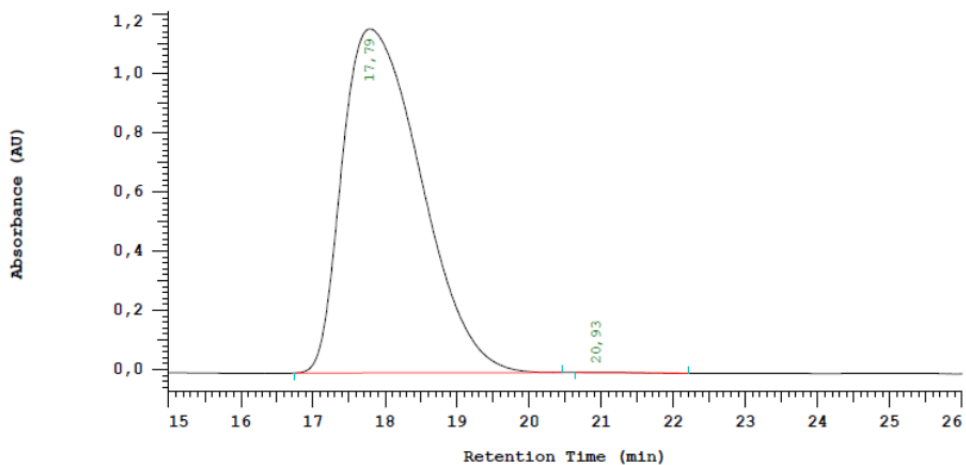

| No. | RT    | Area     | Area %  |
|-----|-------|----------|---------|
| 1   | 17,79 | 44062803 | 99,940  |
| 2   | 20,93 | 26478    | 0,060   |
|     |       | 44089281 | 100,000 |

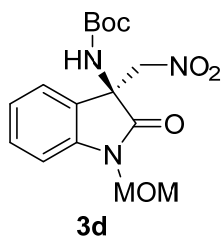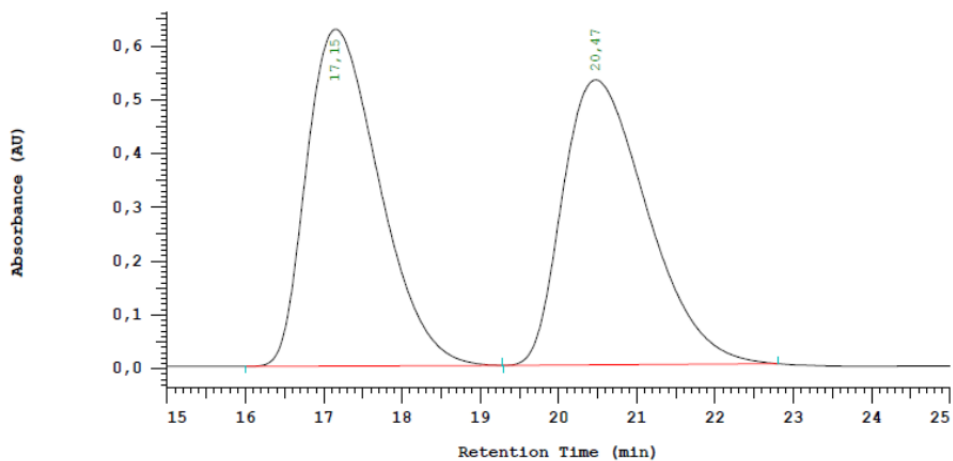

| No. | RT    | Area     | Area %  |
|-----|-------|----------|---------|
| 1   | 17,15 | 20196947 | 50,355  |
| 2   | 20,47 | 19911790 | 49,645  |
|     |       | 40108737 | 100,000 |

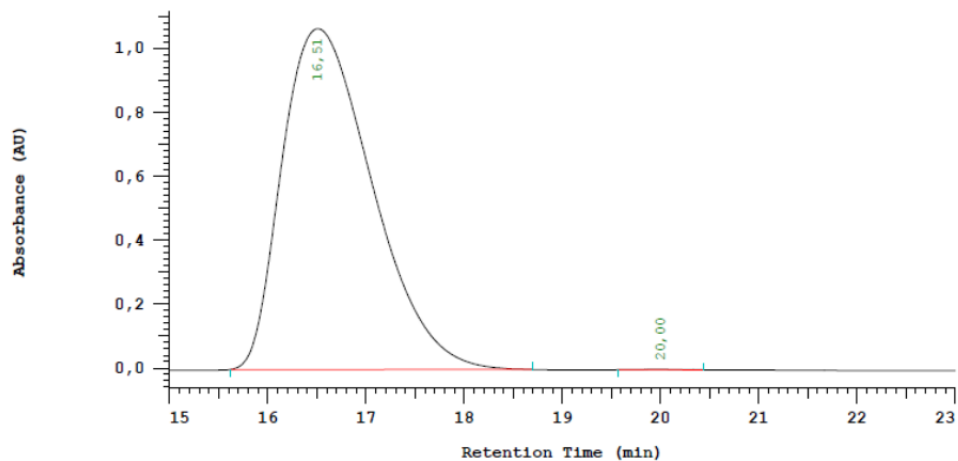

| No. | RT    | Area     | Area %  |
|-----|-------|----------|---------|
| 1   | 16,51 | 34046969 | 99,958  |
| 2   | 20,00 | 14192    | 0,042   |
|     |       | 34061161 | 100,000 |



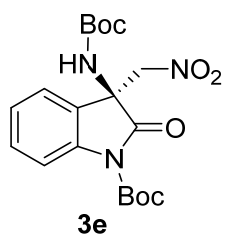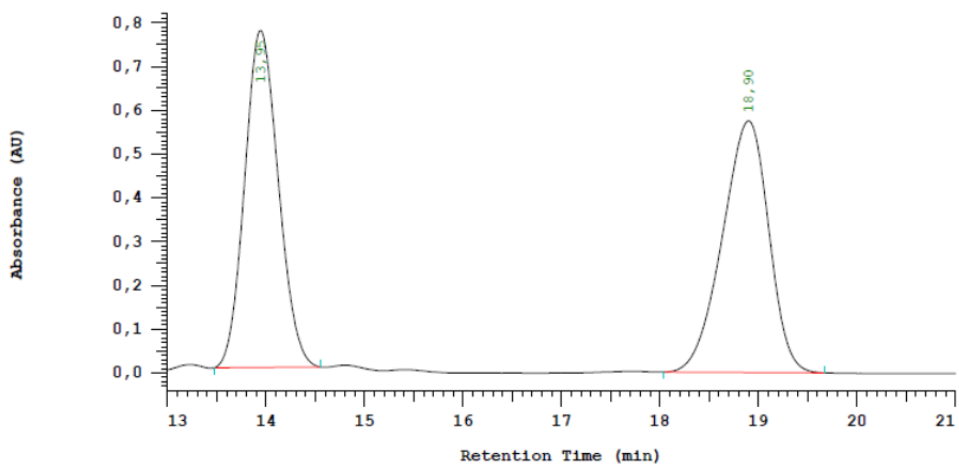

| No. | RT    | Area     | Area %  |
|-----|-------|----------|---------|
| 1   | 13,95 | 9142905  | 49,341  |
| 2   | 18,90 | 9387131  | 50,659  |
|     |       | 18530036 | 100,000 |

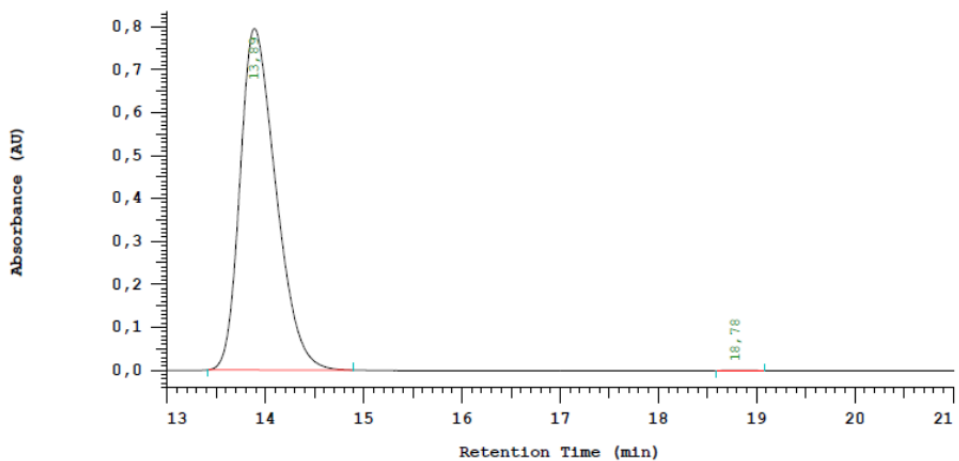

| No. | RT    | Area     | Area %  |
|-----|-------|----------|---------|
| 1   | 13,89 | 10069129 | 99,937  |
| 2   | 18,78 | 6323     | 0,063   |
|     |       | 10075452 | 100,000 |

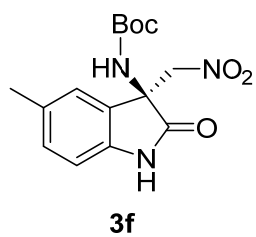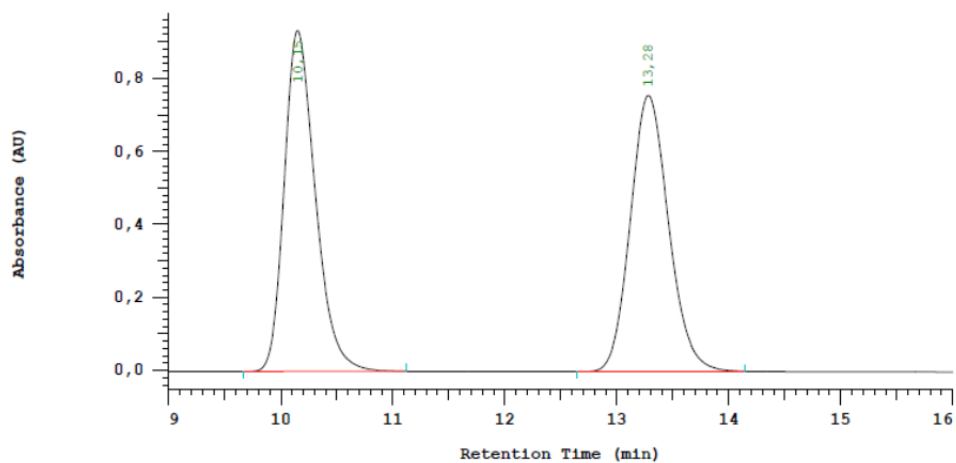

| No. | RT    | Area     | Area %  |
|-----|-------|----------|---------|
| 1   | 10,15 | 9017338  | 50,074  |
| 2   | 13,28 | 8990774  | 49,926  |
|     |       | 18008112 | 100,000 |

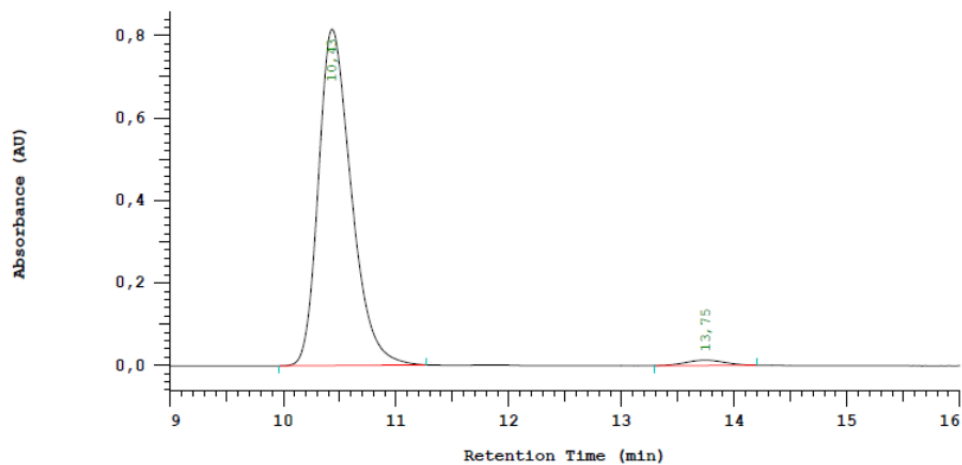

| No. | RT    | Area    | Area %  |
|-----|-------|---------|---------|
| 1   | 10,43 | 8240385 | 98,138  |
| 2   | 13,75 | 156365  | 1,862   |
|     |       | 8396750 | 100,000 |

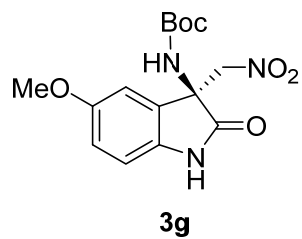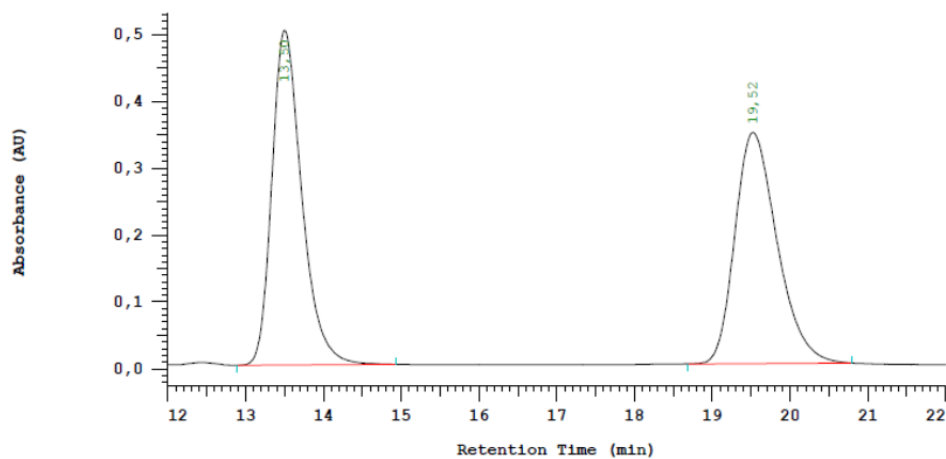

| No. | RT    | Area     | Area %  |
|-----|-------|----------|---------|
| 1   | 13,50 | 6693464  | 50,697  |
| 2   | 19,52 | 6509455  | 49,303  |
|     |       | 13202919 | 100,000 |

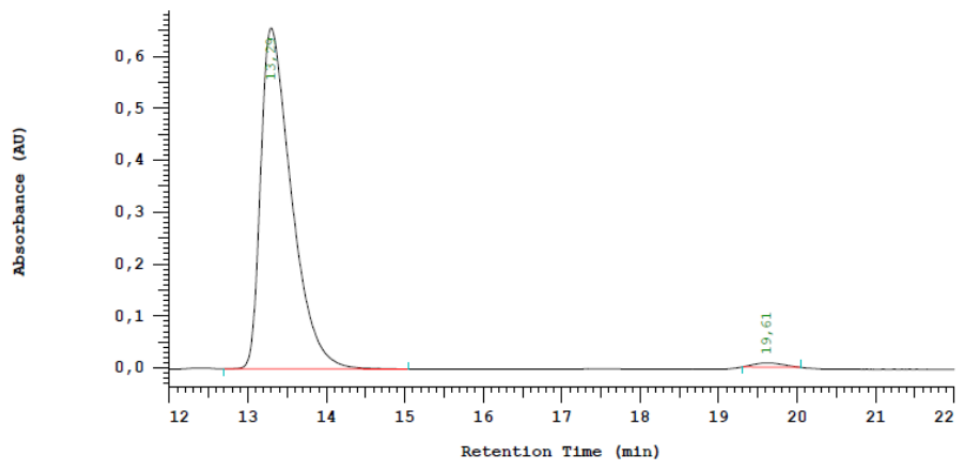

| No. | RT    | Area    | Area %  |
|-----|-------|---------|---------|
| 1   | 13,29 | 8918647 | 98,829  |
| 2   | 19,61 | 105668  | 1,171   |
|     |       | 9024315 | 100,000 |

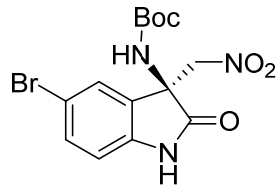

**3h**

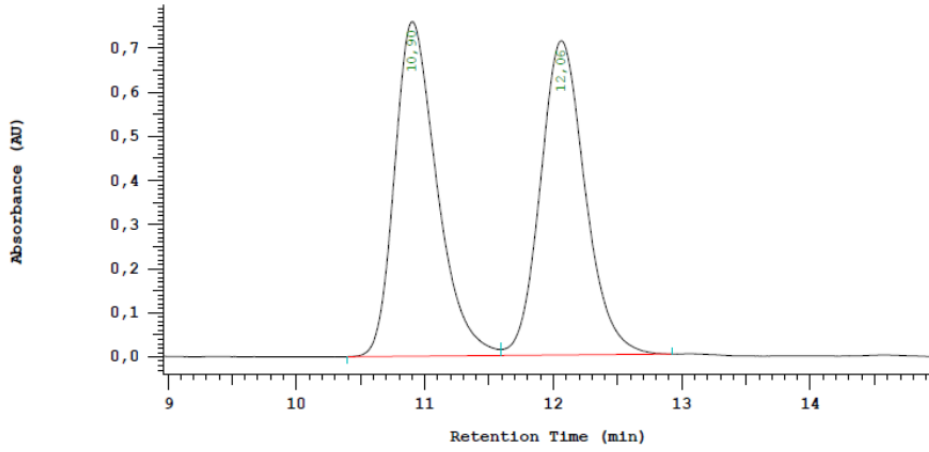

| No. | RT    | Area     | Area %  |
|-----|-------|----------|---------|
| 1   | 10,90 | 8667669  | 50,121  |
| 2   | 12,06 | 8625720  | 49,879  |
|     |       | 17293389 | 100,000 |

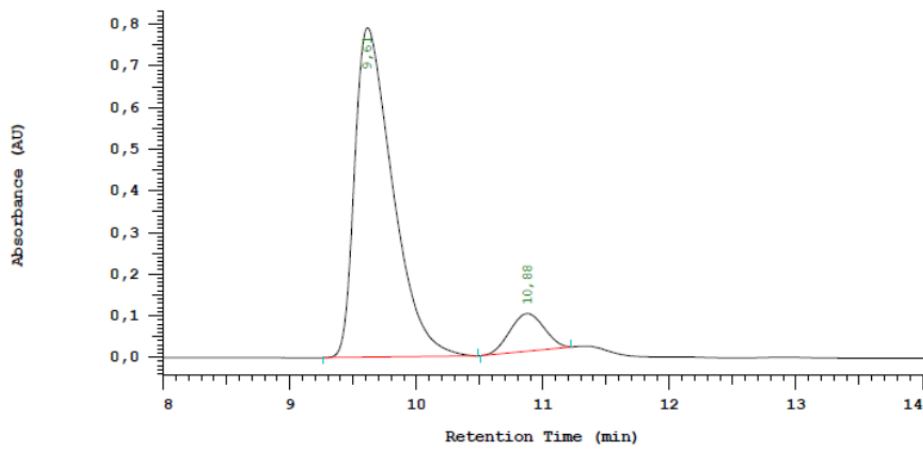

| No. | RT    | Area    | Area %  |
|-----|-------|---------|---------|
| 1   | 9,61  | 8211008 | 90,665  |
| 2   | 10,88 | 845461  | 9,335   |
|     |       | 9056469 | 100,000 |

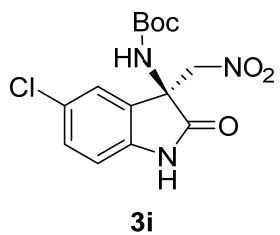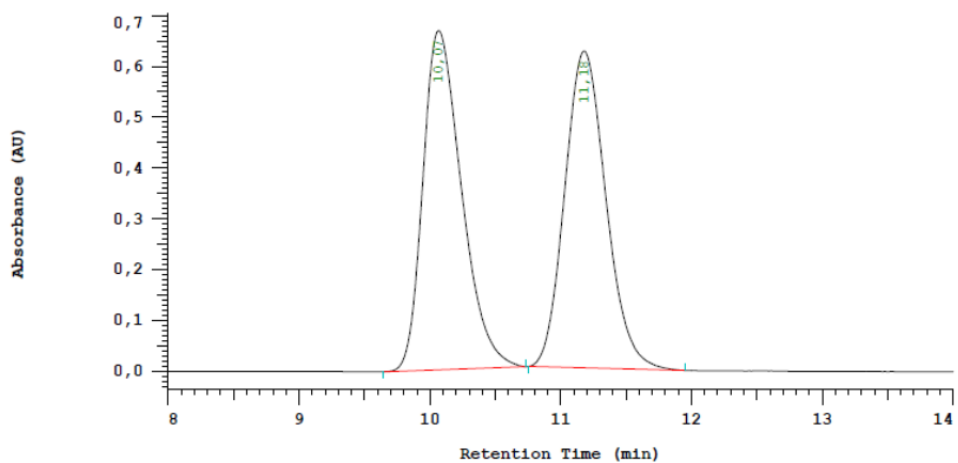

| No. | RT    | Area     | Area %  |
|-----|-------|----------|---------|
| 1   | 10,07 | 6830474  | 50,035  |
| 2   | 11,18 | 6821033  | 49,965  |
|     |       | 13651507 | 100,000 |

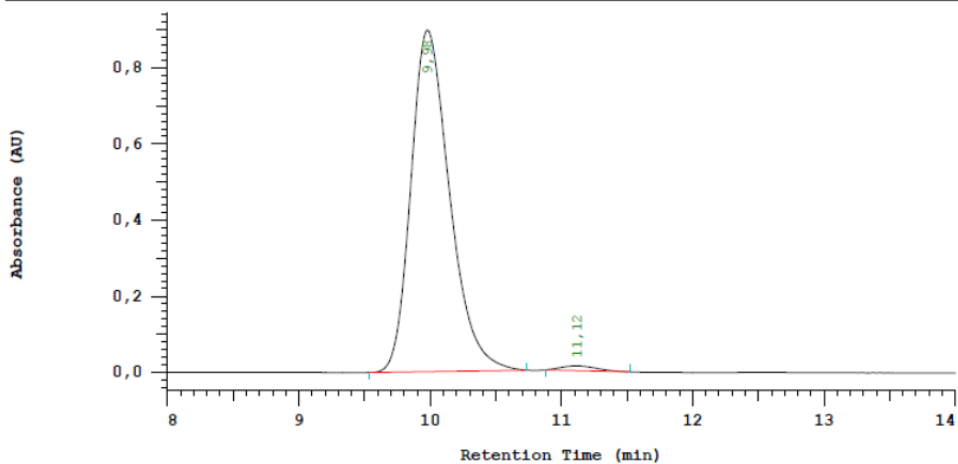

| No. | RT    | Area    | Area %  |
|-----|-------|---------|---------|
| 1   | 9,98  | 9192478 | 98,750  |
| 2   | 11,12 | 116391  | 1,250   |
|     |       | 9308869 | 100,000 |

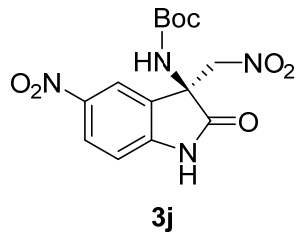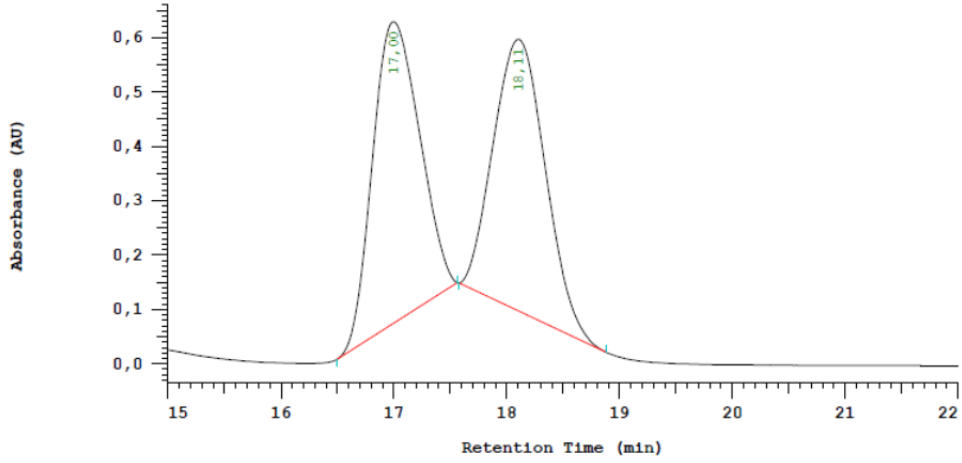

| No. | RT    | Area     | Area %  |
|-----|-------|----------|---------|
| 1   | 17,00 | 7982237  | 49,860  |
| 2   | 18,11 | 8026920  | 50,140  |
|     |       | 16009157 | 100,000 |

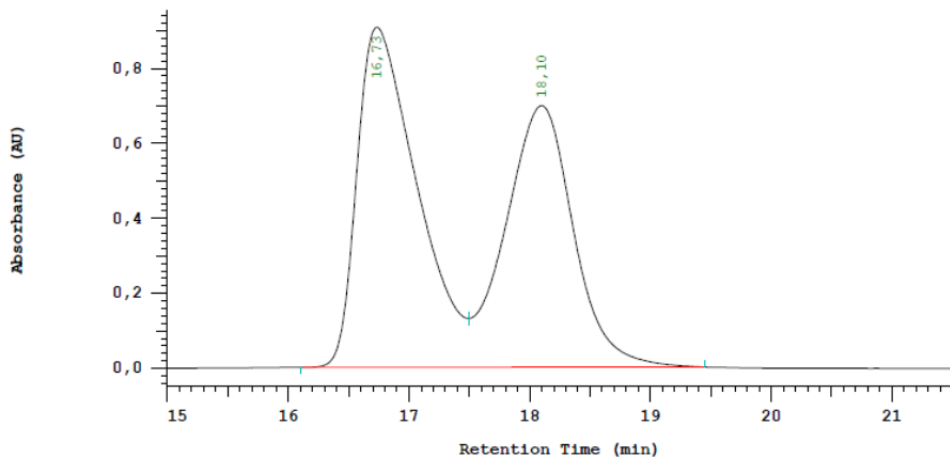

| No. | RT    | Area     | Area %  |
|-----|-------|----------|---------|
| 1   | 16,73 | 15608905 | 53,316  |
| 2   | 18,10 | 13667102 | 46,684  |
|     |       | 29276007 | 100,000 |

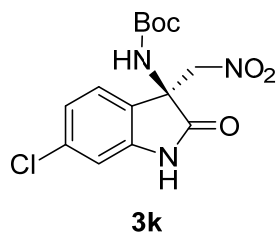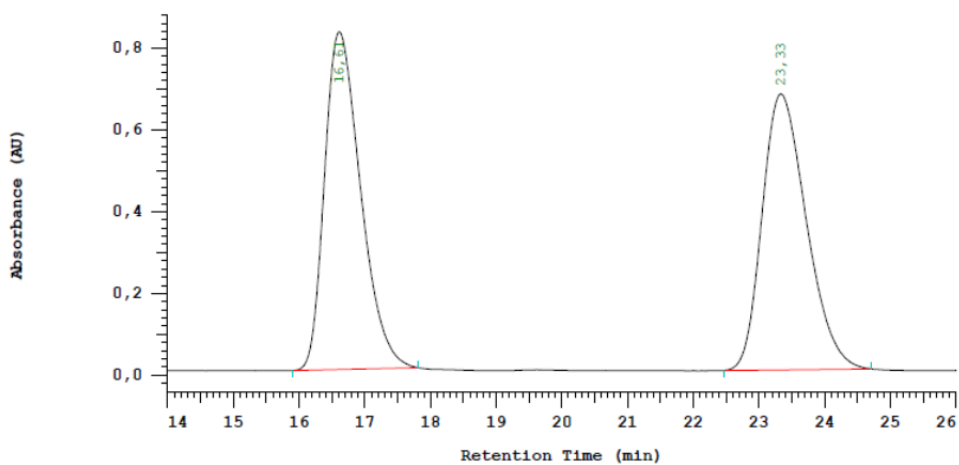

| No. | RT    | Area     | Area %  |
|-----|-------|----------|---------|
| 1   | 16,61 | 15743883 | 50,021  |
| 2   | 23,33 | 15730854 | 49,979  |
|     |       | 31474737 | 100,000 |

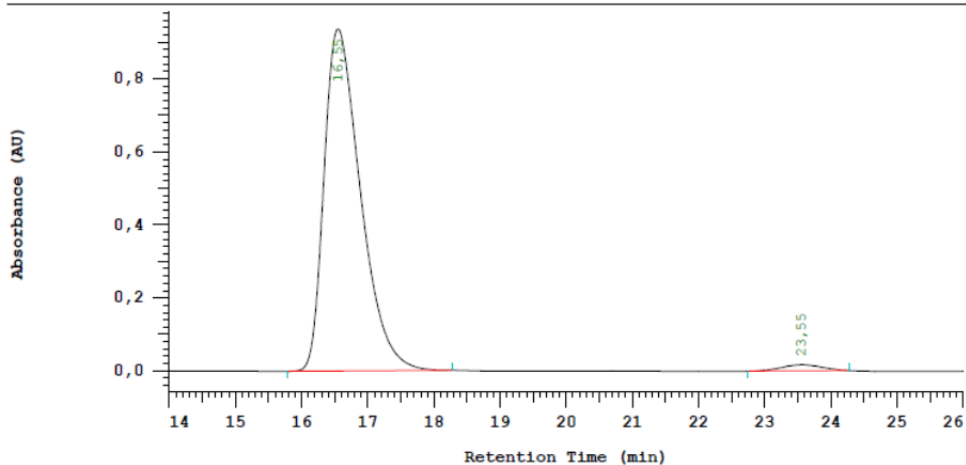

| No. | RT    | Area     | Area %  |
|-----|-------|----------|---------|
| 1   | 16,55 | 17902590 | 98,080  |
| 2   | 23,55 | 350547   | 1,920   |
|     |       | 18253137 | 100,000 |

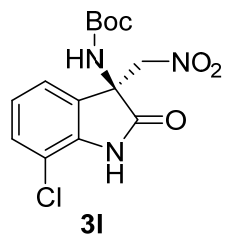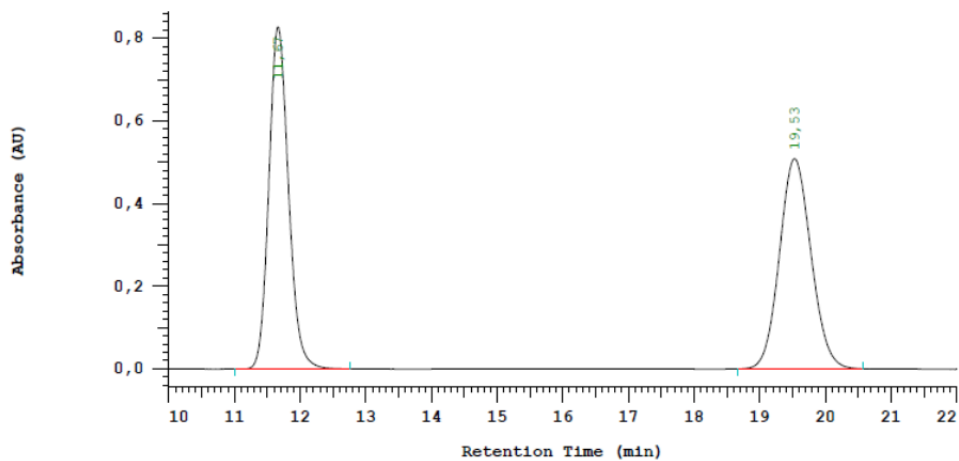

| No. | RT    | Area     | Area %  |
|-----|-------|----------|---------|
| 1   | 11,67 | 8558211  | 50,223  |
| 2   | 19,53 | 8482315  | 49,777  |
|     |       | 17040526 | 100,000 |

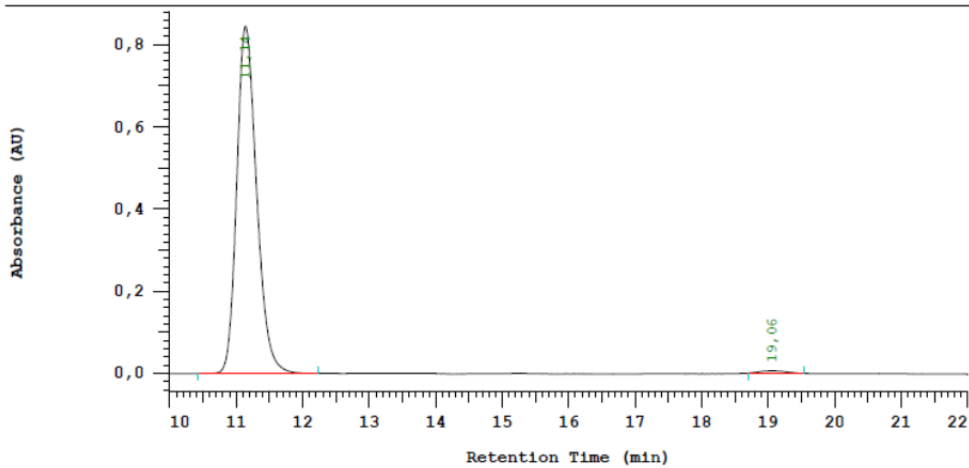

| No. | RT    | Area    | Area %  |
|-----|-------|---------|---------|
| 1   | 11,14 | 8780284 | 99,030  |
| 2   | 19,06 | 85966   | 0,970   |
|     |       | 8866250 | 100,000 |



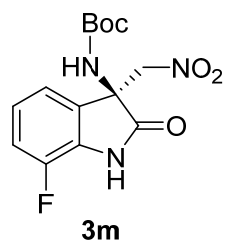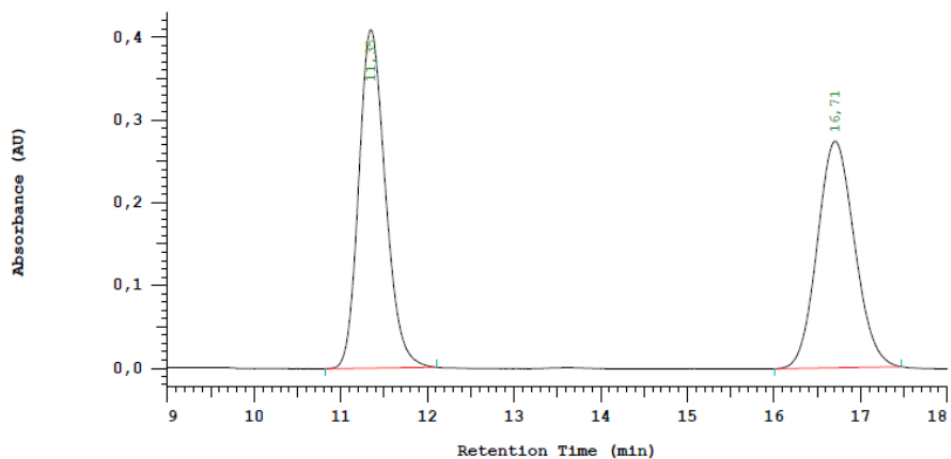

| No. | RT    | Area    | Area %  |
|-----|-------|---------|---------|
| 1   | 11,35 | 4365515 | 51,691  |
| 2   | 16,71 | 4079968 | 48,309  |
|     |       | 8445483 | 100,000 |

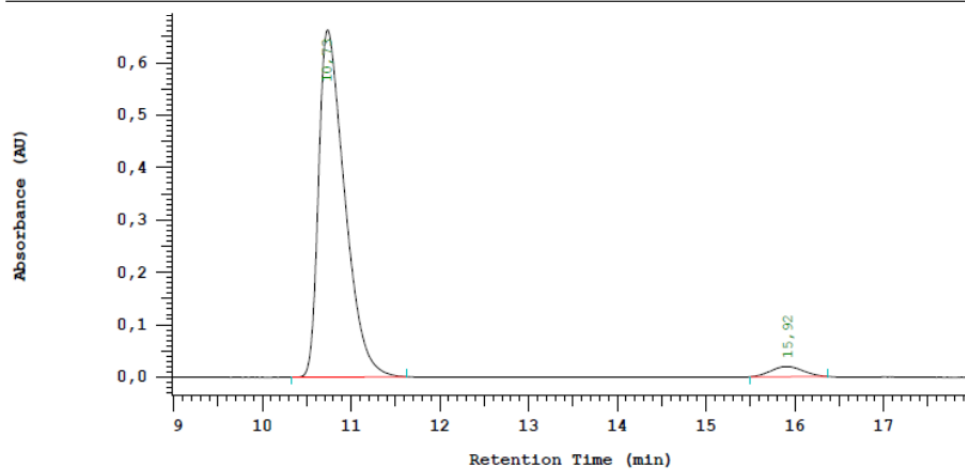

| No. | RT    | Area    | Area %  |
|-----|-------|---------|---------|
| 1   | 10,73 | 6753701 | 96,571  |
| 2   | 15,92 | 239836  | 3,429   |
|     |       | 6993537 | 100,000 |

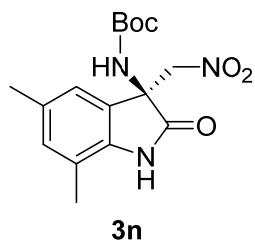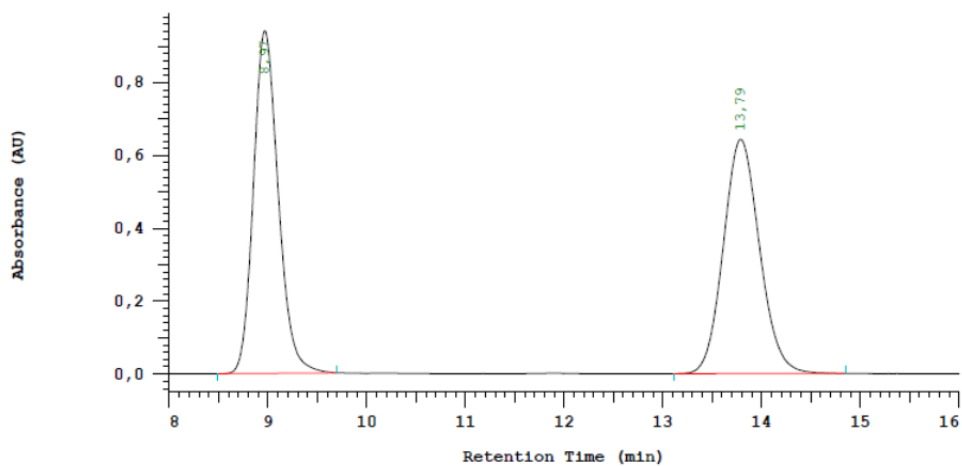

| No. | RT    | Area     | Area %  |
|-----|-------|----------|---------|
| 1   | 8,97  | 8202350  | 50,038  |
| 2   | 13,79 | 8189796  | 49,962  |
|     |       | 16392146 | 100,000 |

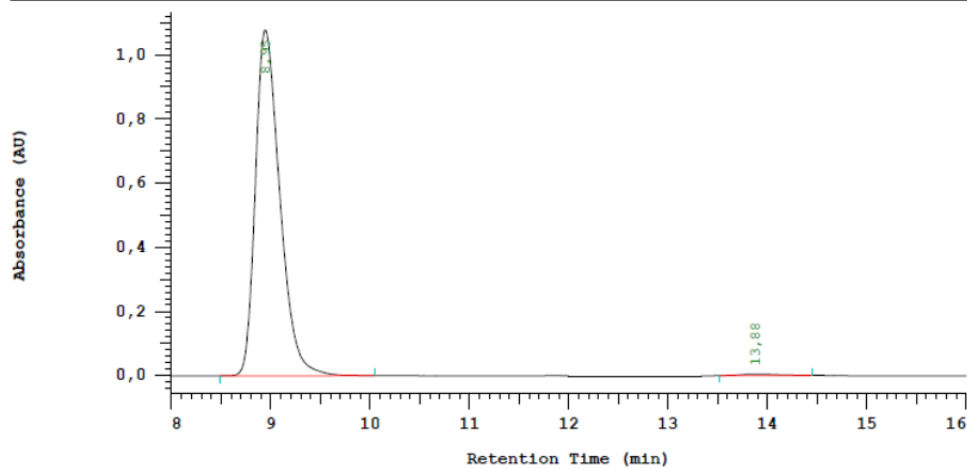

| No. | RT    | Area    | Area %  |
|-----|-------|---------|---------|
| 1   | 8,95  | 9216366 | 99,365  |
| 2   | 13,88 | 58889   | 0,635   |
|     |       | 9275255 | 100,000 |

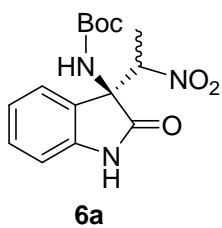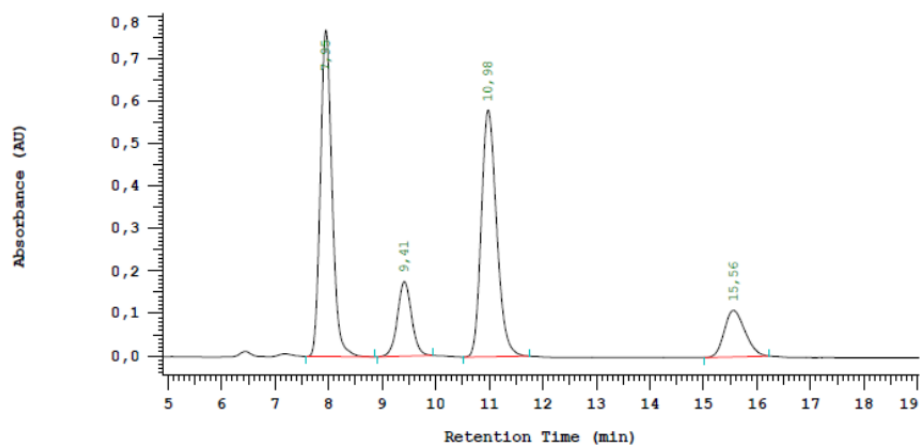

| No. | RT    | Area     | Area %  |
|-----|-------|----------|---------|
| 1   | 7,95  | 5871660  | 39,809  |
| 2   | 9,41  | 1614931  | 10,949  |
| 3   | 10,98 | 5792594  | 39,273  |
| 4   | 15,56 | 1470269  | 9,968   |
|     |       | 14749454 | 100,000 |

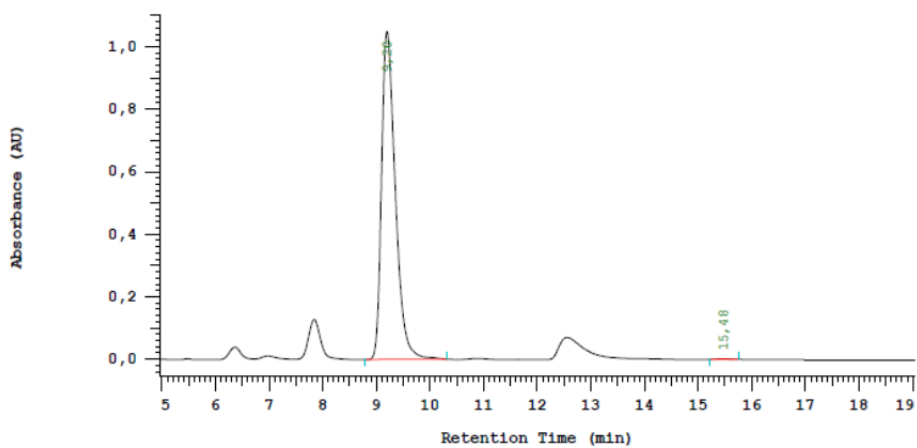

| No. | RT    | Area    | Area %  |
|-----|-------|---------|---------|
| 1   | 9,20  | 9329764 | 99,903  |
| 2   | 15,48 | 9013    | 0,097   |
|     |       | 9338777 | 100,000 |

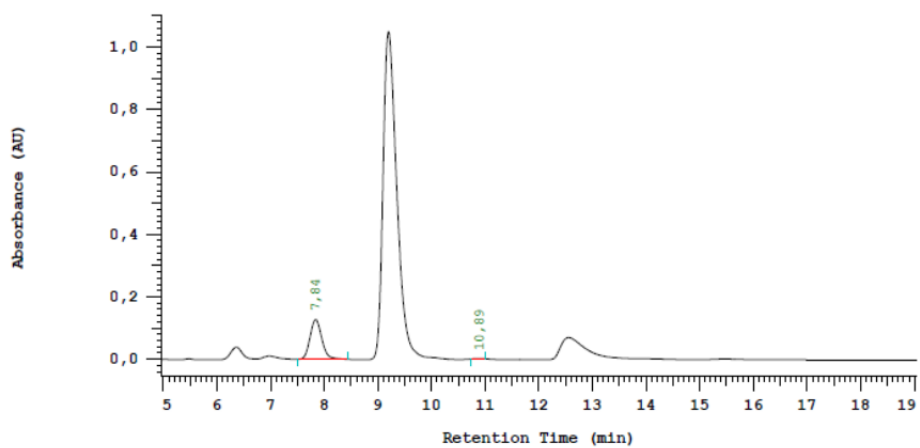

| No. | RT    | Area   | Area %  |
|-----|-------|--------|---------|
| 1   | 7,84  | 971006 | 99,528  |
| 2   | 10,89 | 4608   | 0,472   |
|     |       | 975614 | 100,000 |

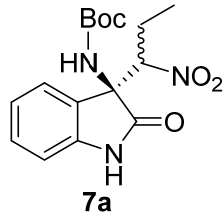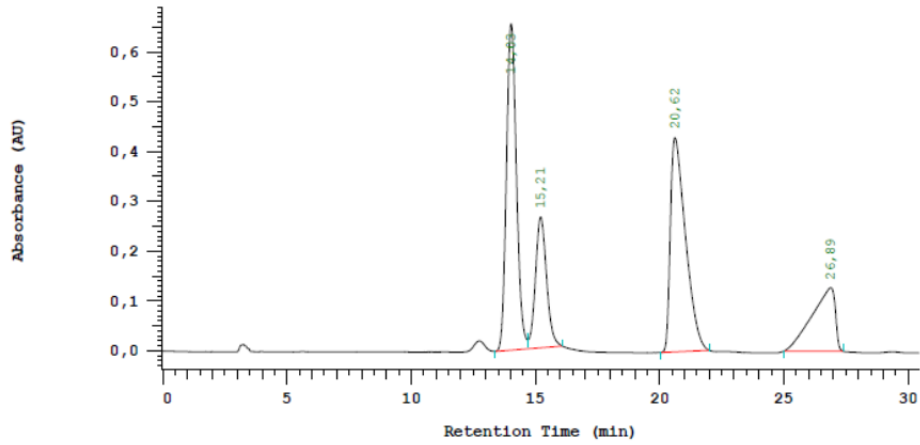

| No. | RT    | Area     | Area %  |
|-----|-------|----------|---------|
| 1   | 14,03 | 9085546  | 34,386  |
| 2   | 15,21 | 4094374  | 15,496  |
| 3   | 20,62 | 9056690  | 34,276  |
| 4   | 26,89 | 4185997  | 15,842  |
|     |       |          | 100,000 |
|     |       | 26422607 |         |

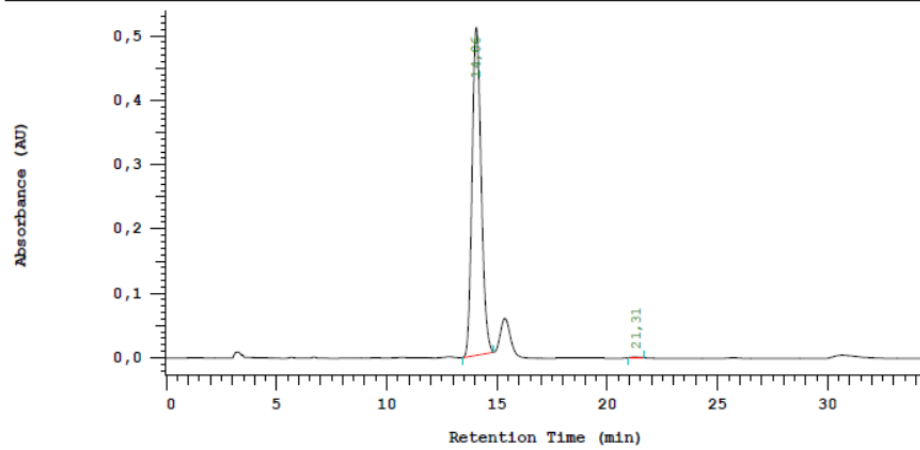

| No. | RT    | Area    | Area %  |
|-----|-------|---------|---------|
| 1   | 14,06 | 7212816 | 99,804  |
| 2   | 21,31 | 14150   | 0,196   |
|     |       |         | 100,000 |
|     |       | 7226966 |         |

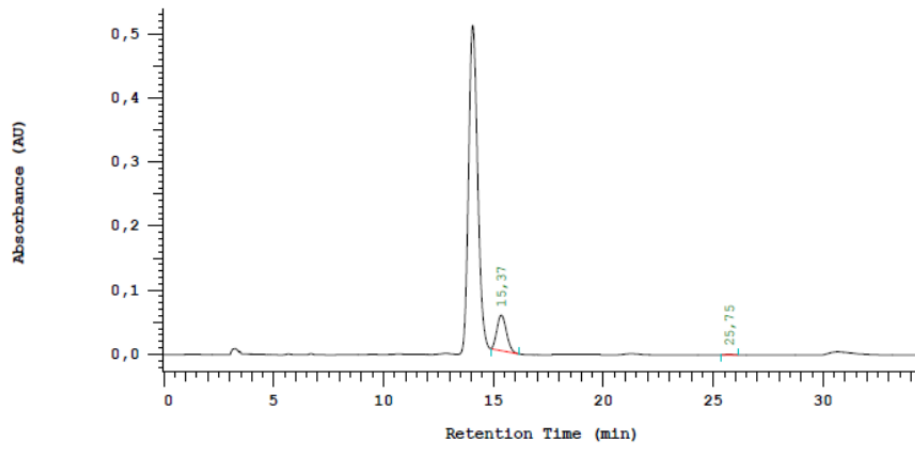

| No. | RT    | Area   | Area %  |
|-----|-------|--------|---------|
| 1   | 15,37 | 836580 | 99,003  |
| 2   | 25,75 | 8420   | 0,997   |
|     |       | 845000 | 100,000 |

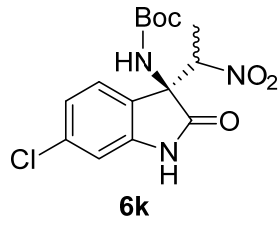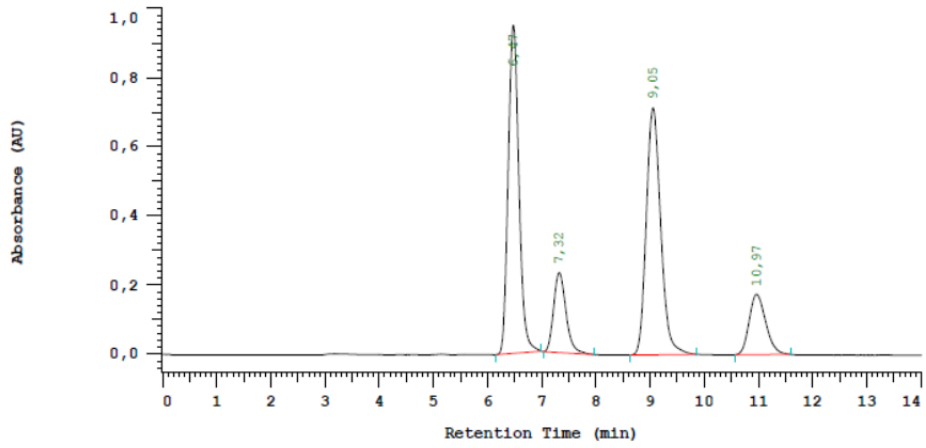

| No. | RT    | Area    | Area %   |
|-----|-------|---------|----------|
| 1   | 6,47  | 6495834 | 38,737   |
| 2   | 7,32  | 1827124 | 10,896   |
| 3   | 9,05  | 6593635 | 39,320   |
| 4   | 10,97 | 1852431 | 11,047   |
|     |       |         | 16769024 |
|     |       |         | 100,000  |

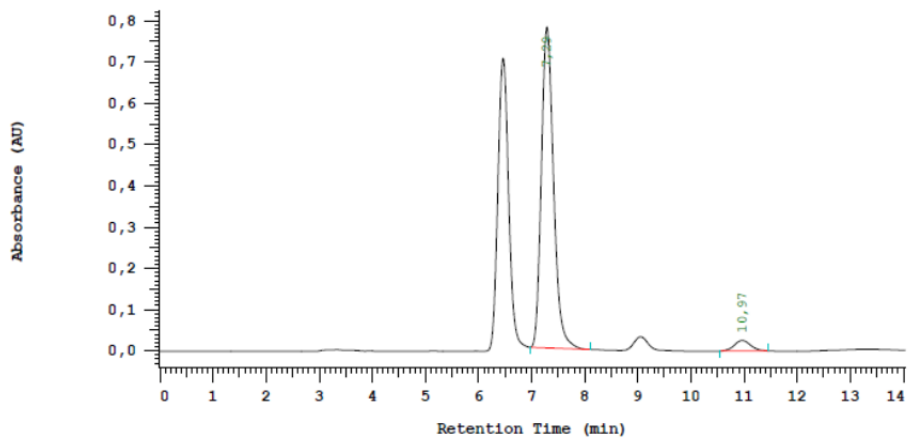

| No. | RT    | Area    | Area %  |
|-----|-------|---------|---------|
| 1   | 7,29  | 6183790 | 95,835  |
| 2   | 10,97 | 268776  | 4,165   |
|     |       |         | 6452566 |
|     |       |         | 100,000 |

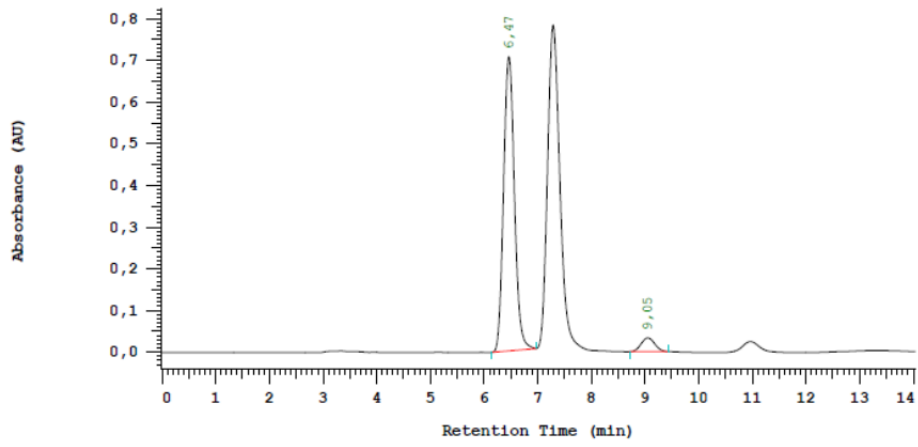

| No. | RT   | Area    | Area %  |
|-----|------|---------|---------|
| 1   | 6,47 | 4932579 | 94,419  |
| 2   | 9,05 | 291547  | 5,581   |
|     |      | 5224126 | 100,000 |



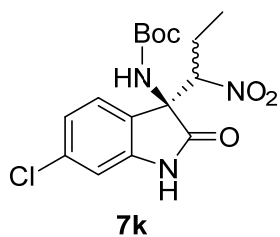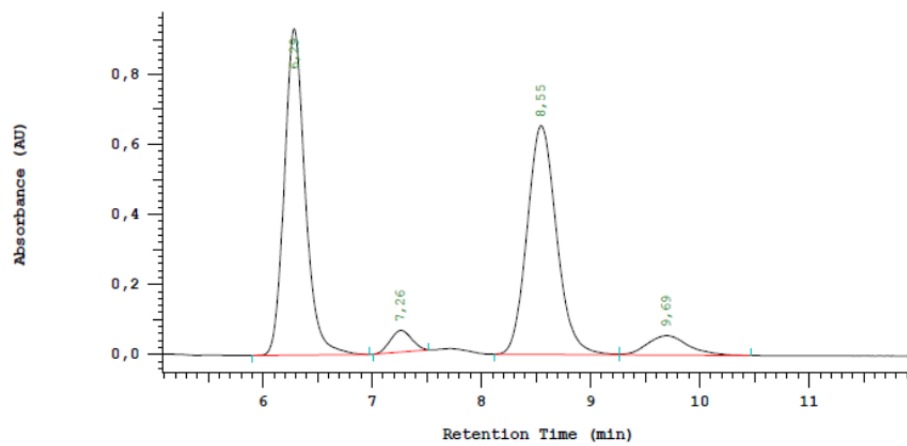

| No. | RT   | Area     | Area %  |
|-----|------|----------|---------|
| 1   | 6,29 | 6192657  | 46,019  |
| 2   | 7,26 | 417839   | 3,105   |
| 3   | 8,55 | 6124110  | 45,509  |
| 4   | 9,69 | 722238   | 5,367   |
|     |      | 13456844 | 100,000 |

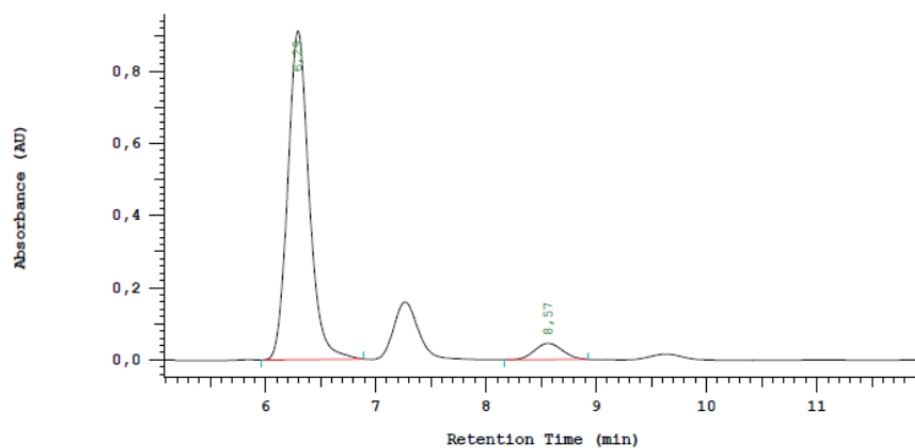

| No. | RT   | Area    | Area %  |
|-----|------|---------|---------|
| 1   | 6,29 | 6130985 | 93,922  |
| 2   | 8,57 | 396783  | 6,078   |
|     |      | 6527768 | 100,000 |

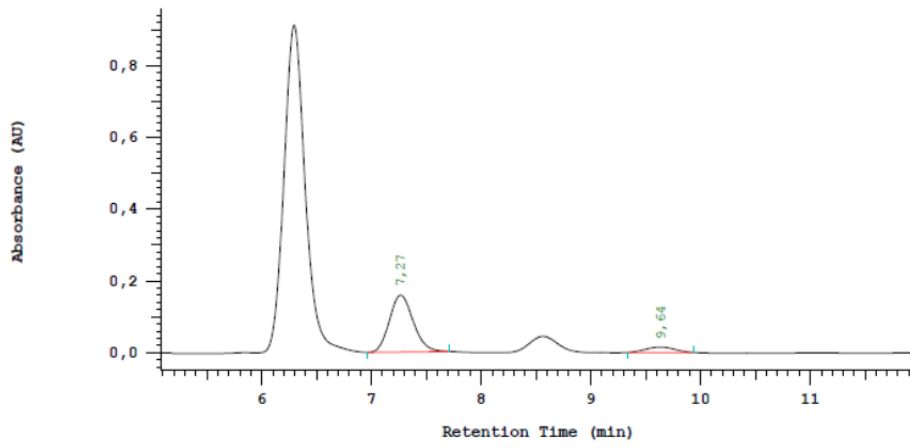

| No. | RT   | Area    | Area %  |
|-----|------|---------|---------|
| 1   | 7,27 | 1192955 | 89,386  |
| 2   | 9,64 | 141656  | 10,614  |
|     |      | 1334611 | 100,000 |

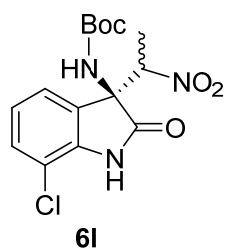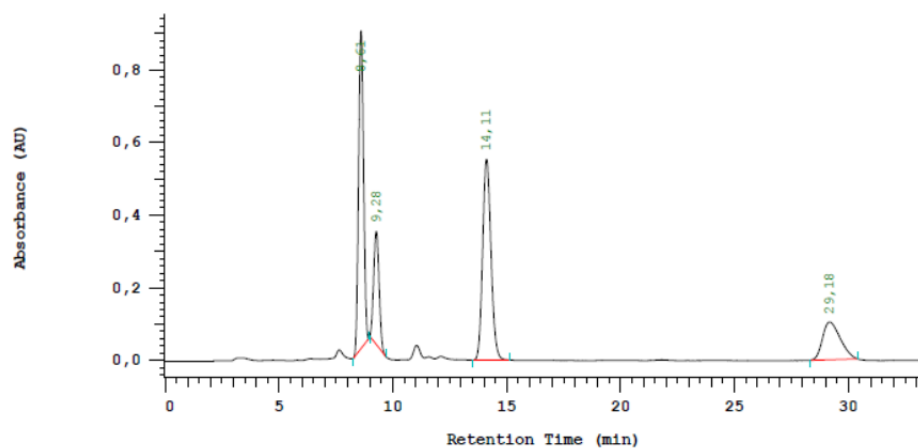

| No. | RT    | Area     | Area %  |
|-----|-------|----------|---------|
| 1   | 8,61  | 6501619  | 34,503  |
| 2   | 9,28  | 2567359  | 13,625  |
| 3   | 14,11 | 6987628  | 37,083  |
| 4   | 29,18 | 2786799  | 14,789  |
|     |       | 18843405 | 100,000 |

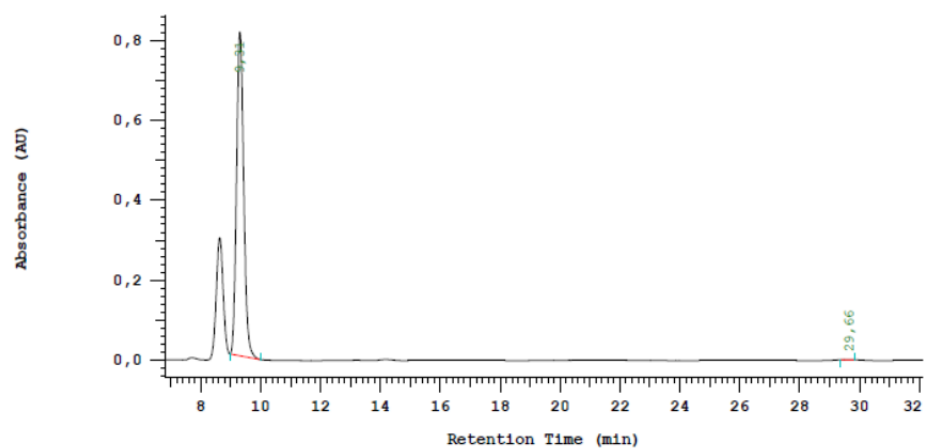

| No. | RT    | Area    | Area %  |
|-----|-------|---------|---------|
| 1   | 9,31  | 6687116 | 99,934  |
| 2   | 29,66 | 4392    | 0,066   |
|     |       | 6691508 | 100,000 |

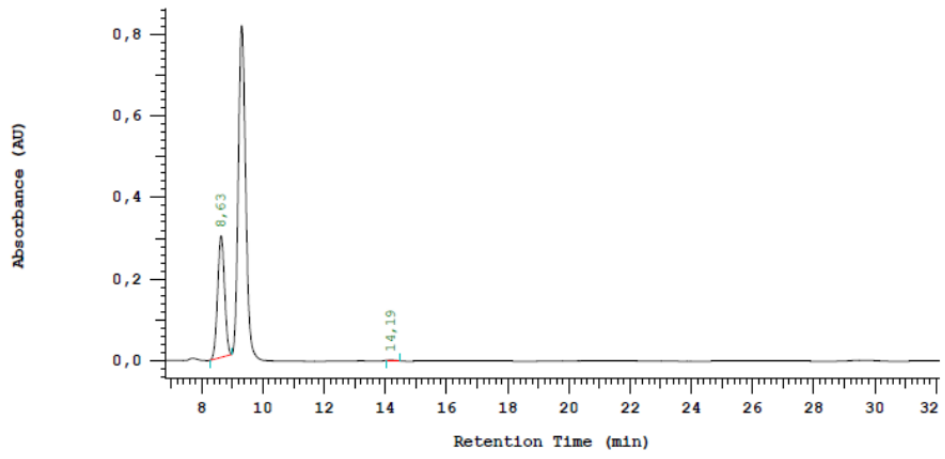

| No. | RT    | Area    | Area %  |
|-----|-------|---------|---------|
| 1   | 8,63  | 2328697 | 99,470  |
| 2   | 14,19 | 12399   | 0,530   |
|     |       | 2341096 | 100,000 |

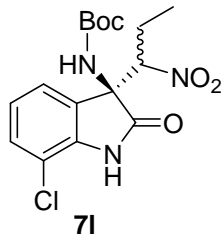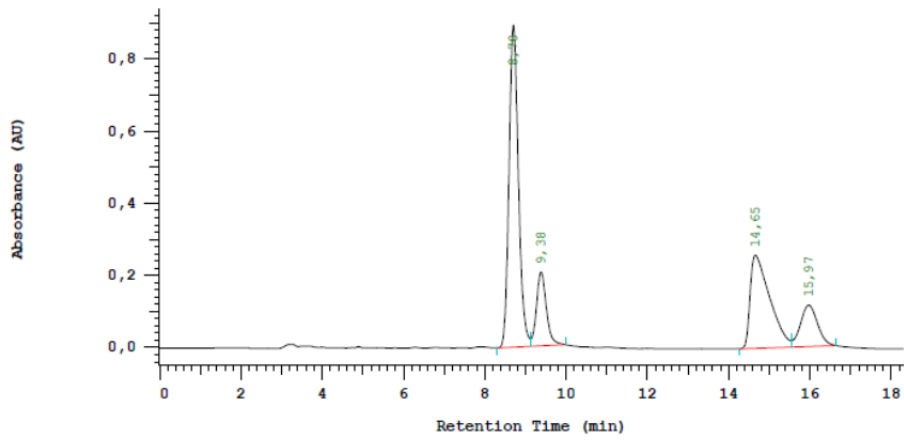

| No. | RT    | Area     | Area %  |
|-----|-------|----------|---------|
| 1   | 8,70  | 7142709  | 48,182  |
| 2   | 9,38  | 1725965  | 11,643  |
| 3   | 14,65 | 4286676  | 28,916  |
| 4   | 15,97 | 1669156  | 11,259  |
|     |       | 14824506 | 100,000 |

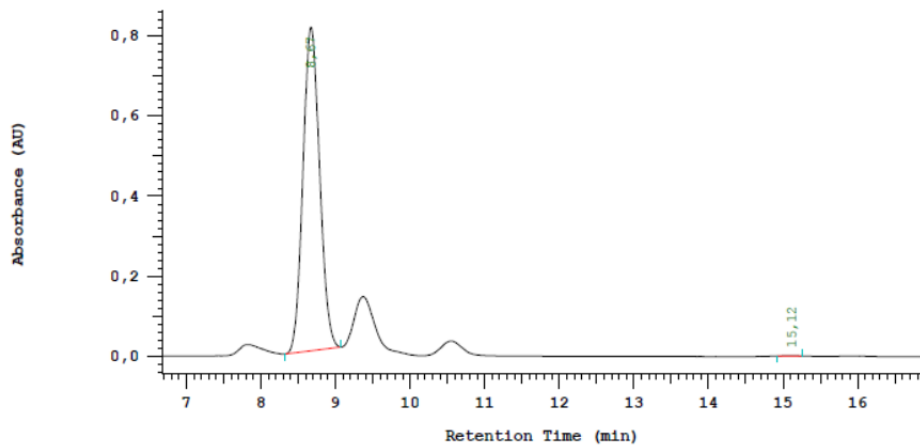

| No. | RT    | Area    | Area %  |
|-----|-------|---------|---------|
| 1   | 8,67  | 6243861 | 99,917  |
| 2   | 15,12 | 5158    | 0,083   |
|     |       | 6249019 | 100,000 |

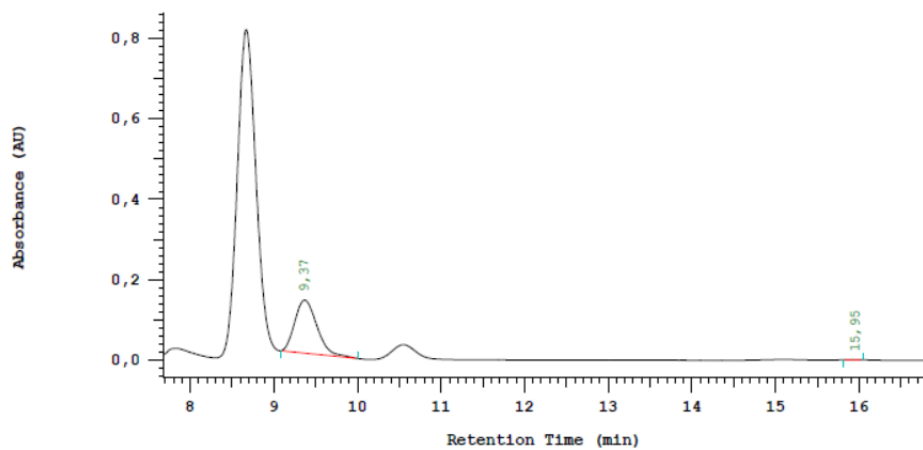

| No. | RT    | Area    | Area %  |
|-----|-------|---------|---------|
| 1   | 9,37  | 1214954 | 99,910  |
| 2   | 15,95 | 1095    | 0,090   |
|     |       | 1216049 | 100,000 |

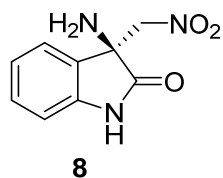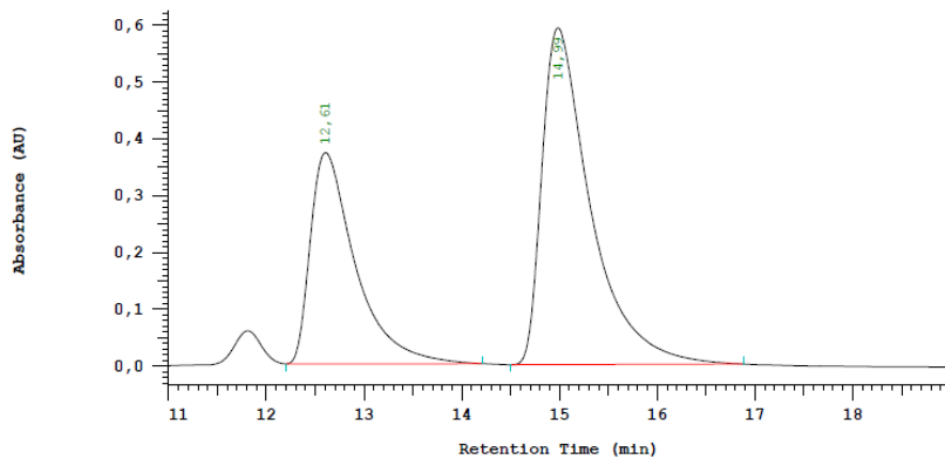

| No. | RT    | Area     | Area %  |
|-----|-------|----------|---------|
| 1   | 12,61 | 5944486  | 36,755  |
| 2   | 14,99 | 10228991 | 63,245  |
|     |       | 16173477 | 100,000 |

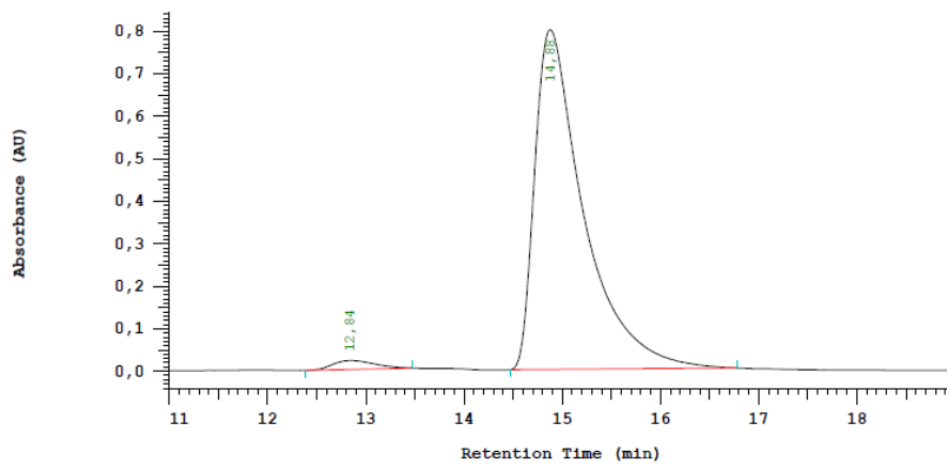

| No. | RT    | Area     | Area %  |
|-----|-------|----------|---------|
| 1   | 12,84 | 306491   | 2,176   |
| 2   | 14,88 | 13780825 | 97,824  |
|     |       | 14087316 | 100,000 |

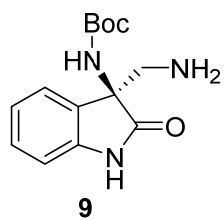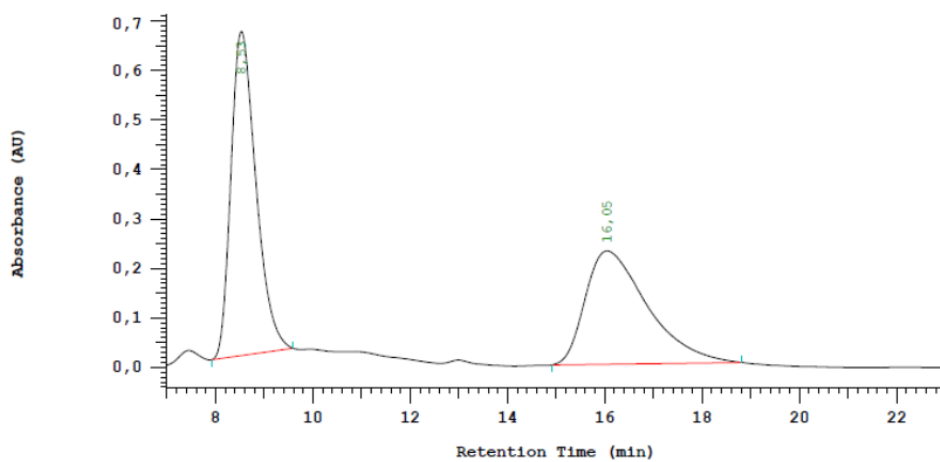

| No. | RT    | Area     | Area %  |
|-----|-------|----------|---------|
| 1   | 8,53  | 11689984 | 53,547  |
| 2   | 16,05 | 10141208 | 46,453  |
|     |       | 21831192 | 100,000 |

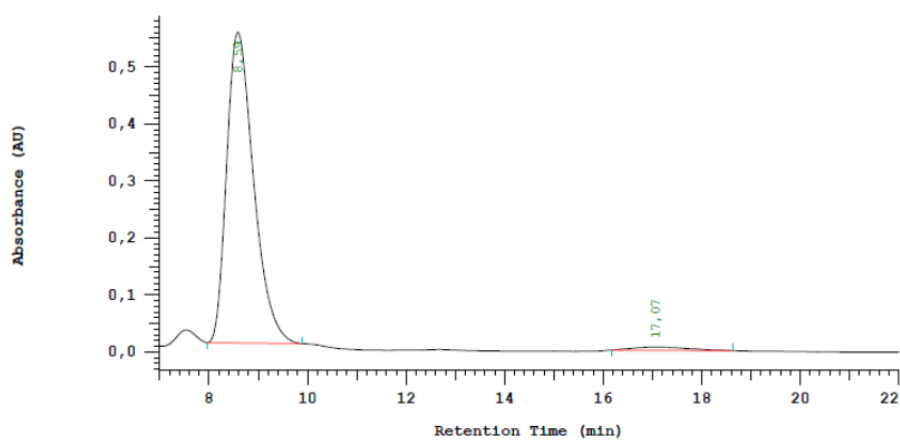

| No. | RT    | Area     | Area %  |
|-----|-------|----------|---------|
| 1   | 8,59  | 10366628 | 97,844  |
| 2   | 17,07 | 228476   | 2,156   |
|     |       | 10595104 | 100,000 |



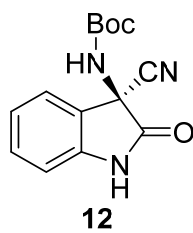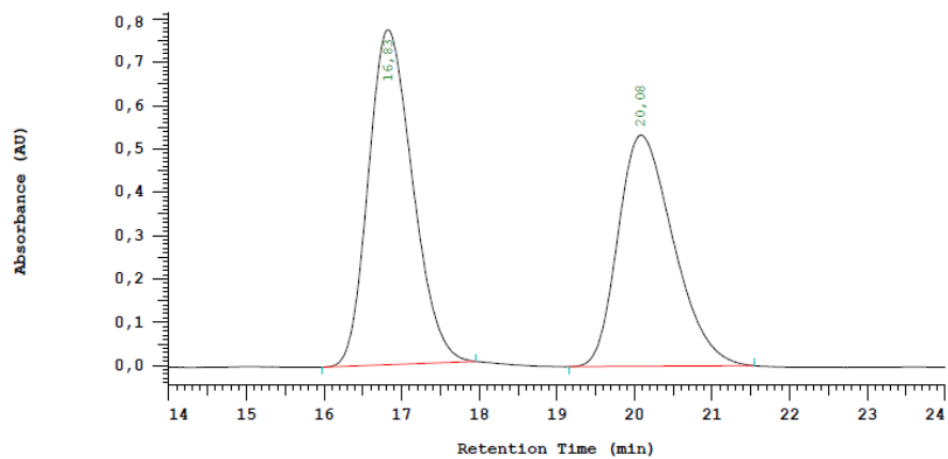

| No. | RT    | Area     | Area %  |
|-----|-------|----------|---------|
| 1   | 16,83 | 15301796 | 53,653  |
| 2   | 20,08 | 13218218 | 46,347  |
|     |       | 28520014 | 100,000 |

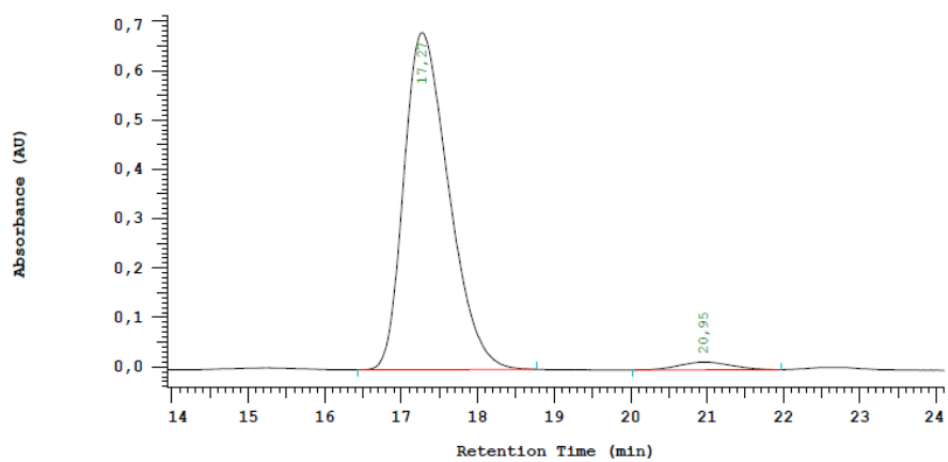

| No. | RT    | Area     | Area %  |
|-----|-------|----------|---------|
| 1   | 17,27 | 13886897 | 97,396  |
| 2   | 20,95 | 371345   | 2,604   |
|     |       | 14258242 | 100,000 |

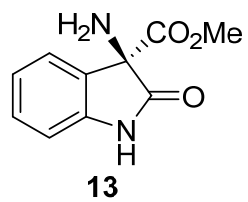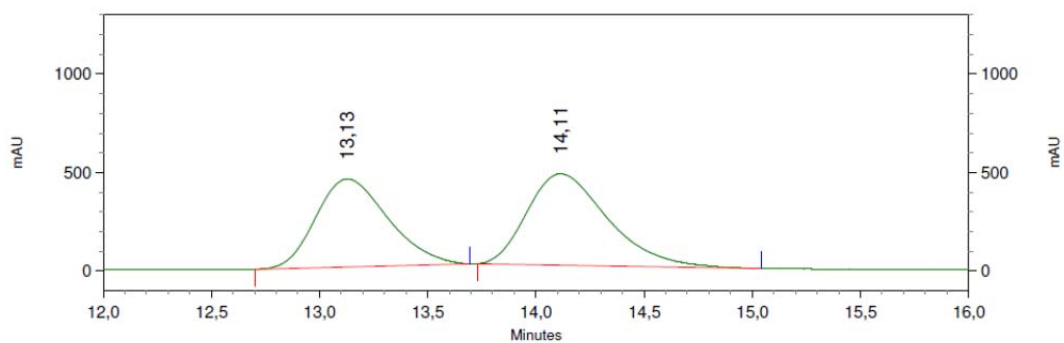

1: 211 nm, 4 nm Results

| Retention Time | Area     | Area Percent |
|----------------|----------|--------------|
| 13,13          | 41518833 | 46,345       |
| 14,11          | 48066914 | 53,655       |

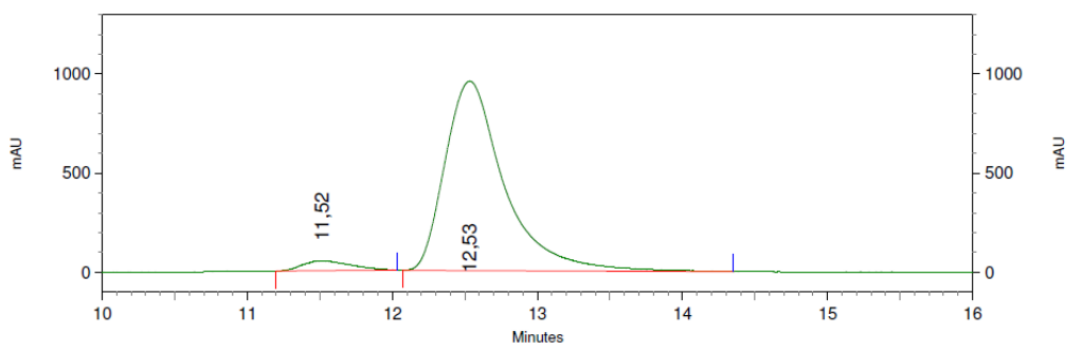

1: 265 nm, 4 nm Results

| Retention Time | Area      | Area Percent |
|----------------|-----------|--------------|
| 11,52          | 4648003   | 4,112        |
| 12,53          | 108397210 | 95,888       |
